# Supplementary material
Source: HighWire-hosted journal article supplement (https://bmjopen.bmj.com/content/7/7/e016070)
Supplement: inline-supplementary-material-3 [file inline-supplementary-material-3.pdf]

|           |                                   |                                                                                                                                                                                                                                                                                                                                                                                                                                                                                                                                                                                                                                                                                                                                                                                                                                                                                          |
|-----------|-----------------------------------|------------------------------------------------------------------------------------------------------------------------------------------------------------------------------------------------------------------------------------------------------------------------------------------------------------------------------------------------------------------------------------------------------------------------------------------------------------------------------------------------------------------------------------------------------------------------------------------------------------------------------------------------------------------------------------------------------------------------------------------------------------------------------------------------------------------------------------------------------------------------------------------|
| <b>OP</b> |                                   | and sudden death.                                                                                                                                                                                                                                                                                                                                                                                                                                                                                                                                                                                                                                                                                                                                                                                                                                                                        |
|           | <b>Remarks</b>                    | * <u>Non-exhaustive list of drugs that may exacerbate HF</u> : NSAIDs (except low-dose aspirin) and COX2-inhibitor: by hydro-sodium retention, antiarrhythmic drugs (except digoxin and amiodarone), tricyclic antidepressants, carbamazepine, corticosteroids (oral or inhaled), glitazones, and calcium inhibitors (except amlodipine and felodipine): by negative inotropic effects, moxonidine, and sotalol.<br>** <u>Non-exhaustive list of sodium-rich drugs</u> : sodium alginate, bicarbonate, diphosphate, effervescent drugs, fosfomycin, penicillins, phosphate, piperacillin, salicylate.                                                                                                                                                                                                                                                                                    |
|           | <b>References</b>                 | ESC 2012: Acute and Chronic Heart Failure:<br><a href="http://eurheartj.oxfordjournals.org/content/33/14/1787.full.pdf?bcsi_scan_628cd39dca2568d2=xWJ7tj2YrRFR05fphQuC5p247toBAAAAd3H7AA==&amp;bcsi_scan_filename=1787.full.pdf">http://eurheartj.oxfordjournals.org/content/33/14/1787.full.pdf?bcsi_scan_628cd39dca2568d2=xWJ7tj2YrRFR05fphQuC5p247toBAAAAd3H7AA==&amp;bcsi_scan_filename=1787.full.pdf</a><br>ACCF/AHA 2013: Guideline for the Management of Heart Failure:<br><a href="http://circ.ahajournals.org/content/128/16/e240.full.pdf">http://circ.ahajournals.org/content/128/16/e240.full.pdf</a><br>George J, et al. Association between cardiovascular events and sodium containing effervescent, dispersible, and soluble drugs: nested case-control study. BMJ 2013: <a href="http://www.bmj.com/content/347/bmj.f6954">http://www.bmj.com/content/347/bmj.f6954</a> |
|           | <b>Strength of recommendation</b> | Experts median agreement: agree<br>Median usefulness rating: useful                                                                                                                                                                                                                                                                                                                                                                                                                                                                                                                                                                                                                                                                                                                                                                                                                      |

### DYSLIPIDAEMIA and HYPOLIPIDEMICS

|                                   |                                                                              |                                                                                                                                                                                                                                                                                                                                                                                                                                                                                                                                                                                                                                                                                                                                                                                                                                                                                                                                                                                                                                                                                                                                                                                                                                                                                                                                                                  |
|-----------------------------------|------------------------------------------------------------------------------|------------------------------------------------------------------------------------------------------------------------------------------------------------------------------------------------------------------------------------------------------------------------------------------------------------------------------------------------------------------------------------------------------------------------------------------------------------------------------------------------------------------------------------------------------------------------------------------------------------------------------------------------------------------------------------------------------------------------------------------------------------------------------------------------------------------------------------------------------------------------------------------------------------------------------------------------------------------------------------------------------------------------------------------------------------------------------------------------------------------------------------------------------------------------------------------------------------------------------------------------------------------------------------------------------------------------------------------------------------------|
| <b>5 UP</b>                       | <b>Rational</b>                                                              | Primary and secondary prevention of heart disease.                                                                                                                                                                                                                                                                                                                                                                                                                                                                                                                                                                                                                                                                                                                                                                                                                                                                                                                                                                                                                                                                                                                                                                                                                                                                                                               |
|                                   | <b>Recommendations</b>                                                       | *Therapeutic objectives targeted based on the cardiovascular risk:<br><u>Very high cardiovascular risk</u> : Heart disease, T2DM, T1DM with organ impairment, moderate to severe renal impairment or HeartScore $\geq 10\%$ : lifestyle and dietary rules and intensive statin treatment (reduction $\geq 50\%$ of the initial LDLc level).<br><u>High cardiovascular risk</u> : 1 pronounced risk factor or HeartScore $\geq 5$ and $< 10\%$ : lifestyle and dietary rules +/- moderate statin treatment.<br><u>Low to moderate risk</u> : HeartScore greater than 1 - $< 5\%$ : lifestyle and dietary rules.<br>It is possible to estimate the cardiovascular risk using different scores**.                                                                                                                                                                                                                                                                                                                                                                                                                                                                                                                                                                                                                                                                   |
|                                   | <b>**Useful links</b>                                                        | HeartScore: <a href="http://www.heartscore.org/Pages/welcome.aspx">http://www.heartscore.org/Pages/welcome.aspx</a><br>Framingham score: <a href="http://cvdrisk.nhlbi.nih.gov/calculator.asp">http://cvdrisk.nhlbi.nih.gov/calculator.asp</a><br>Framingham score adapted to patients with HIV:<br><a href="http://www.hivpv.org/Home/Tools/tabid/91/ctl/ExamView/mid/500/eid/0/lid/0/Default.aspx">http://www.hivpv.org/Home/Tools/tabid/91/ctl/ExamView/mid/500/eid/0/lid/0/Default.aspx</a><br>ASCVD score: <a href="http://tools.cardiosource.org/ASCVD-Risk-Estimator/">http://tools.cardiosource.org/ASCVD-Risk-Estimator/</a>                                                                                                                                                                                                                                                                                                                                                                                                                                                                                                                                                                                                                                                                                                                            |
|                                   | <b>References</b>                                                            | ACC/AHA 2013: Treatment of Blood Cholesterol to Reduce Atherosclerotic Cardiovascular Risk in Adults:<br><a href="http://www.joslin.org/docs/2013-ACC-AHA-Guideline-Treatment-of-Blood-Cholesterol-to-Reduce-Atherosclerotic-Cardiovascular-Risk-in-Adults.pdf">http://www.joslin.org/docs/2013-ACC-AHA-Guideline-Treatment-of-Blood-Cholesterol-to-Reduce-Atherosclerotic-Cardiovascular-Risk-in-Adults.pdf</a><br>ESC/EAS 2012: Guidelines on cardiovascular disease prevention in clinical practice:<br><a href="http://eurheartj.oxfordjournals.org/content/33/13/1635.full.pdf?bcsi_scan_628cd39dca2568d2=jXT1M9P0KMth/PmrbO8RUB5K0p4BAAAUFolAA==&amp;bcsi_scan_filename=1635.full.pdf">http://eurheartj.oxfordjournals.org/content/33/13/1635.full.pdf?bcsi_scan_628cd39dca2568d2=jXT1M9P0KMth/PmrbO8RUB5K0p4BAAAUFolAA==&amp;bcsi_scan_filename=1635.full.pdf</a><br>CCSG 2012: Diagnosis and Treatment of Dyslipidemia for the Prevention of Cardiovascular Disease in the Adult:<br><a href="http://ac.els-cdn.com/S0828282X12015103/1-s2.0-S0828282X12015103-main.pdf?_tid=4ea0bcbe-e12e-11e3-991f-00000aab0f01&amp;acdnat=1400707655_cbb12eab76ca6fd802ca29d6de6a284d">http://ac.els-cdn.com/S0828282X12015103/1-s2.0-S0828282X12015103-main.pdf?_tid=4ea0bcbe-e12e-11e3-991f-00000aab0f01&amp;acdnat=1400707655_cbb12eab76ca6fd802ca29d6de6a284d</a> |
| <b>Strength of recommendation</b> | Experts median agreement: strongly agree<br>Median usefulness rating: useful | % of experts agree or strongly agree: 94.9 %<br>% of experts rating items useful or very useful: 89.7 %                                                                                                                                                                                                                                                                                                                                                                                                                                                                                                                                                                                                                                                                                                                                                                                                                                                                                                                                                                                                                                                                                                                                                                                                                                                          |

|             |                                   |                                                                                                                                                                                                                                                                                                                                                                                                                                                                                                                                                                                                                                                                                                                                                                                                                                                                                                                                                                                                                                                                                                                                                                                   |
|-------------|-----------------------------------|-----------------------------------------------------------------------------------------------------------------------------------------------------------------------------------------------------------------------------------------------------------------------------------------------------------------------------------------------------------------------------------------------------------------------------------------------------------------------------------------------------------------------------------------------------------------------------------------------------------------------------------------------------------------------------------------------------------------------------------------------------------------------------------------------------------------------------------------------------------------------------------------------------------------------------------------------------------------------------------------------------------------------------------------------------------------------------------------------------------------------------------------------------------------------------------|
| <b>6 UP</b> | <b>Rational</b>                   | Prevention of heart disease.<br>Allows a decrease in the LDL-c and triglycerides and an increase in the HDL-c.                                                                                                                                                                                                                                                                                                                                                                                                                                                                                                                                                                                                                                                                                                                                                                                                                                                                                                                                                                                                                                                                    |
|             | <b>Recommendation</b>             | <u>Suggested dosing regimen</u> : maximum tolerated dose making it possible to achieve the target LDL-c level, based on the cardiovascular risk (*see item 5).                                                                                                                                                                                                                                                                                                                                                                                                                                                                                                                                                                                                                                                                                                                                                                                                                                                                                                                                                                                                                    |
|             | <b>References</b>                 | CCSG 2012: Diagnosis and Treatment of Dyslipidemia for the Prevention of Cardiovascular Disease in the Adult:<br><a href="http://ac.els-cdn.com/S0828282X12015103/1-s2.0-S0828282X12015103-main.pdf?_tid=4ea0bcbe-e12e-11e3-991f-00000aab0f01&amp;acdnat=1400707655_cbb12eab76ca6fd802ca29d6de6a284d">http://ac.els-cdn.com/S0828282X12015103/1-s2.0-S0828282X12015103-main.pdf?_tid=4ea0bcbe-e12e-11e3-991f-00000aab0f01&amp;acdnat=1400707655_cbb12eab76ca6fd802ca29d6de6a284d</a><br>ACC/AHA 2013: Treatment of Blood Cholesterol to Reduce Atherosclerotic Cardiovascular Risk in Adults:<br><a href="http://www.joslin.org/docs/2013-ACC-AHA-Guideline-Treatment-of-Blood-Cholesterol-to-Reduce-Atherosclerotic-Cardiovascular-Risk-in-Adults.pdf">http://www.joslin.org/docs/2013-ACC-AHA-Guideline-Treatment-of-Blood-Cholesterol-to-Reduce-Atherosclerotic-Cardiovascular-Risk-in-Adults.pdf</a><br>ESC 2011: Dyslipidaemias (Management of): <a href="http://www.escardio.org/guidelines-surveys/esc-guidelines/GuidelinesDocuments/Dyslipidaemias-2011.aspx">http://www.escardio.org/guidelines-surveys/esc-guidelines/GuidelinesDocuments/Dyslipidaemias-2011.aspx</a> |
|             | <b>Strength of recommendation</b> | Experts median agreement: agree<br>Median usefulness rating: useful                                                                                                                                                                                                                                                                                                                                                                                                                                                                                                                                                                                                                                                                                                                                                                                                                                                                                                                                                                                                                                                                                                               |

|              |                 |                                                                                                                  |
|--------------|-----------------|------------------------------------------------------------------------------------------------------------------|
| <b>7 DDI</b> | <b>Rational</b> | Most statins undergo a hepatic metabolism involving the CYP (except pravastatin, rosuvastatin and pitavastatin). |
|--------------|-----------------|------------------------------------------------------------------------------------------------------------------|



|             |                                   |                                                                                                                                                                                                                                                                                                                                                                                                                                                                                                                                                                                                                                                                                                                                                                                                                                                                                                                                                                                                                                                                                                                                                                                                                                                                                                                                                                                                                                                                                                                                                                                                                                                                                                                                                                                                                                                                                                                                |                                                                                                         |
|-------------|-----------------------------------|--------------------------------------------------------------------------------------------------------------------------------------------------------------------------------------------------------------------------------------------------------------------------------------------------------------------------------------------------------------------------------------------------------------------------------------------------------------------------------------------------------------------------------------------------------------------------------------------------------------------------------------------------------------------------------------------------------------------------------------------------------------------------------------------------------------------------------------------------------------------------------------------------------------------------------------------------------------------------------------------------------------------------------------------------------------------------------------------------------------------------------------------------------------------------------------------------------------------------------------------------------------------------------------------------------------------------------------------------------------------------------------------------------------------------------------------------------------------------------------------------------------------------------------------------------------------------------------------------------------------------------------------------------------------------------------------------------------------------------------------------------------------------------------------------------------------------------------------------------------------------------------------------------------------------------|---------------------------------------------------------------------------------------------------------|
| 12<br>Other | <b>Rational</b>                   | Secondary prevention of an acute cardiovascular event.                                                                                                                                                                                                                                                                                                                                                                                                                                                                                                                                                                                                                                                                                                                                                                                                                                                                                                                                                                                                                                                                                                                                                                                                                                                                                                                                                                                                                                                                                                                                                                                                                                                                                                                                                                                                                                                                         |                                                                                                         |
|             | <b>References</b>                 | ACCF/AHA 2013: Guideline for the Management of ST-Elevation Myocardial Infarction: <a href="https://circ.ahajournals.org/content/127/4/e362.full.pdf">https://circ.ahajournals.org/content/127/4/e362.full.pdf</a><br>ESC 2012: Acute Myocardial Infarction in patients presenting with ST-segment elevation (Management of): <a href="http://www.escardio.org/guidelines-surveys/esc-guidelines/GuidelinesDocuments/AMI-STEMI.aspx">http://www.escardio.org/guidelines-surveys/esc-guidelines/GuidelinesDocuments/AMI-STEMI.aspx</a><br>ESC 2011: Acute Coronary Syndromes (ACS) in patients presenting without persistent ST-segment elevation (Management of): <a href="http://www.escardio.org/guidelines-surveys/esc-guidelines/GuidelinesDocuments/ACS-2011.aspx">http://www.escardio.org/guidelines-surveys/esc-guidelines/GuidelinesDocuments/ACS-2011.aspx</a>                                                                                                                                                                                                                                                                                                                                                                                                                                                                                                                                                                                                                                                                                                                                                                                                                                                                                                                                                                                                                                                        |                                                                                                         |
|             | <b>Strength of recommendation</b> | Experts median agreement: strongly agree<br>Median usefulness rating: useful                                                                                                                                                                                                                                                                                                                                                                                                                                                                                                                                                                                                                                                                                                                                                                                                                                                                                                                                                                                                                                                                                                                                                                                                                                                                                                                                                                                                                                                                                                                                                                                                                                                                                                                                                                                                                                                   | % of experts agree or strongly agree: 97.4 %<br>% of experts rating items useful or very useful: 84.6 % |
| 13<br>UP    | <b>Rational</b>                   | Secondary prevention of an acute cardiovascular event.                                                                                                                                                                                                                                                                                                                                                                                                                                                                                                                                                                                                                                                                                                                                                                                                                                                                                                                                                                                                                                                                                                                                                                                                                                                                                                                                                                                                                                                                                                                                                                                                                                                                                                                                                                                                                                                                         |                                                                                                         |
|             | <b>Recommendations</b>            | <u>As 1<sup>st</sup> line treatment</u> : cardioselective beta-blockers* are preferred, with the goal of a heart rate < 70/min.<br><u>Alternative</u> : in patients with beta-blockers intolerance, verapamil or diltiazem may be offered (Only in patients without HF, or decreased LVEF).<br>Monitor DDI and adapt treatment before starting these molecules.                                                                                                                                                                                                                                                                                                                                                                                                                                                                                                                                                                                                                                                                                                                                                                                                                                                                                                                                                                                                                                                                                                                                                                                                                                                                                                                                                                                                                                                                                                                                                                |                                                                                                         |
|             | <b>Remarks</b>                    | *Non-exhaustive list of cardioselective beta-blockers: acebutolol, atenolol, bevantolol (+ alpha-agonist), bisoprolol, celiprolol (+ alpha-blocker), esmolol, metoprolol, pafenolol, practolol, tolamolol, xamoterol.                                                                                                                                                                                                                                                                                                                                                                                                                                                                                                                                                                                                                                                                                                                                                                                                                                                                                                                                                                                                                                                                                                                                                                                                                                                                                                                                                                                                                                                                                                                                                                                                                                                                                                          |                                                                                                         |
|             | <b>References</b>                 | ACCF/AHA 2013: Guideline for the Management of ST-Elevation Myocardial Infarction: <a href="https://circ.ahajournals.org/content/127/4/e362.full.pdf">https://circ.ahajournals.org/content/127/4/e362.full.pdf</a><br>ESC 2012: Acute Myocardial Infarction in patients presenting with ST-segment elevation (Management of): <a href="http://www.escardio.org/guidelines-surveys/esc-guidelines/GuidelinesDocuments/AMI-STEMI.aspx">http://www.escardio.org/guidelines-surveys/esc-guidelines/GuidelinesDocuments/AMI-STEMI.aspx</a><br>ESC 2011: Acute Coronary Syndromes (ACS) in patients presenting without persistent ST-segment elevation (Management of): <a href="http://www.escardio.org/guidelines-surveys/esc-guidelines/GuidelinesDocuments/ACS-2011.aspx">http://www.escardio.org/guidelines-surveys/esc-guidelines/GuidelinesDocuments/ACS-2011.aspx</a>                                                                                                                                                                                                                                                                                                                                                                                                                                                                                                                                                                                                                                                                                                                                                                                                                                                                                                                                                                                                                                                        |                                                                                                         |
|             | <b>Strength of recommendation</b> | Experts median agreement: strongly agree<br>Median usefulness rating: very useful                                                                                                                                                                                                                                                                                                                                                                                                                                                                                                                                                                                                                                                                                                                                                                                                                                                                                                                                                                                                                                                                                                                                                                                                                                                                                                                                                                                                                                                                                                                                                                                                                                                                                                                                                                                                                                              | % of experts agree or strongly agree: 100 %<br>% of experts rating items useful or very useful: 94.9 %  |
| 14<br>UP    | <b>Rational</b>                   | Secondary prevention of an acute cardiovascular event.                                                                                                                                                                                                                                                                                                                                                                                                                                                                                                                                                                                                                                                                                                                                                                                                                                                                                                                                                                                                                                                                                                                                                                                                                                                                                                                                                                                                                                                                                                                                                                                                                                                                                                                                                                                                                                                                         |                                                                                                         |
|             | <b>Recommendations</b>            | <u>Suggested regimen</u> : double antiplatelet therapy for 1 month if a bare stent has been placed, 6 months if an impregnated stent has been placed, (duration between 1 and 12 months depending on risk factors and the type of endoprosthesis), then low-dose aspirin, alone, for life (75–160 mg QD)<br>Re-evaluate the duration of the double antiplatelet therapy on a case-by-case basis and in collaboration with a cardiologist in the event a stent is placed (based on the risk of thrombosis on the endoprosthesis, haemorrhage risk, presence of an anticoagulant, etc.).<br><u>As 2<sup>nd</sup> line</u> : long-term clopidogrel (75 mg QD), prasugrel (10 mg QD), ticagrelor (90 mg BID).                                                                                                                                                                                                                                                                                                                                                                                                                                                                                                                                                                                                                                                                                                                                                                                                                                                                                                                                                                                                                                                                                                                                                                                                                      |                                                                                                         |
|             | <b>References</b>                 | ACCF/AHA 2013: Guideline for the Management of ST-Elevation Myocardial Infarction: <a href="https://circ.ahajournals.org/content/127/4/e362.full.pdf">https://circ.ahajournals.org/content/127/4/e362.full.pdf</a><br>ESC 2013: Aspirin, still first-line in secondary prevention of cardiovascular complications in peripheral artery disease: <a href="http://www.escardio.org/communities/councils/ccp/e-journal/volume11/Pages/Aspirin-peripheral-arterial-occlusive-disease.aspx#.UtHeLtJFVWI">http://www.escardio.org/communities/councils/ccp/e-journal/volume11/Pages/Aspirin-peripheral-arterial-occlusive-disease.aspx#.UtHeLtJFVWI</a><br>ACCP 2012: Antiplatelet Drugs. American College of Chest Physicians Evidence Based Clinical Practice Guidelines (9th Edition): <a href="http://journal.publications.chestnet.org/data/Journals/CHEST/23443/112293.pdf">http://journal.publications.chestnet.org/data/Journals/CHEST/23443/112293.pdf</a><br>ACCF/AHA 2012: Focused Update Incorporated Into the ACCF/AHA 2007 Guidelines for the Management of Patients With Unstable Angina/Non–ST-Elevation Myocardial Infarction: <a href="http://circ.ahajournals.org/content/127/23/e663.full.pdf">http://circ.ahajournals.org/content/127/23/e663.full.pdf</a><br>ESC 2012: Acute Myocardial Infarction in patients presenting with ST-segment elevation (Management of): <a href="http://www.escardio.org/guidelines-surveys/esc-guidelines/GuidelinesDocuments/AMI-STEMI.aspx">http://www.escardio.org/guidelines-surveys/esc-guidelines/GuidelinesDocuments/AMI-STEMI.aspx</a><br>ESC 2011: Acute Coronary Syndromes (ACS) in patients presenting without persistent ST-segment elevation (Management of): <a href="http://www.escardio.org/guidelines-surveys/esc-guidelines/GuidelinesDocuments/ACS-2011.aspx">http://www.escardio.org/guidelines-surveys/esc-guidelines/GuidelinesDocuments/ACS-2011.aspx</a> |                                                                                                         |
|             | <b>Strength of recommendation</b> | Experts median agreement: strongly agree<br>Median usefulness rating: very useful                                                                                                                                                                                                                                                                                                                                                                                                                                                                                                                                                                                                                                                                                                                                                                                                                                                                                                                                                                                                                                                                                                                                                                                                                                                                                                                                                                                                                                                                                                                                                                                                                                                                                                                                                                                                                                              | % of experts agree or strongly agree: 100 %<br>% of experts rating items useful or very useful: 94.9 %  |
|             | <b>Rational</b>                   | Management of cardiovascular risk factors.                                                                                                                                                                                                                                                                                                                                                                                                                                                                                                                                                                                                                                                                                                                                                                                                                                                                                                                                                                                                                                                                                                                                                                                                                                                                                                                                                                                                                                                                                                                                                                                                                                                                                                                                                                                                                                                                                     |                                                                                                         |
| 15<br>UP    | <b>Recommendations</b>            | <u>As 1<sup>st</sup> line treatment</u> : medium or high dose statins combined with lifestyle and dietary measures.<br><u>In case of intolerance</u> : cholesterol reducer, alone or in combination with a biliary acid or                                                                                                                                                                                                                                                                                                                                                                                                                                                                                                                                                                                                                                                                                                                                                                                                                                                                                                                                                                                                                                                                                                                                                                                                                                                                                                                                                                                                                                                                                                                                                                                                                                                                                                     |                                                                                                         |

|                            |                                   |                                                                                                                                                                                                                                                                                                                                                                                                                                                                                                                                                                                                                                                                                                                                                                                                                                                                                                                                                                                                                                                                                                                                                                                                   |
|----------------------------|-----------------------------------|---------------------------------------------------------------------------------------------------------------------------------------------------------------------------------------------------------------------------------------------------------------------------------------------------------------------------------------------------------------------------------------------------------------------------------------------------------------------------------------------------------------------------------------------------------------------------------------------------------------------------------------------------------------------------------------------------------------------------------------------------------------------------------------------------------------------------------------------------------------------------------------------------------------------------------------------------------------------------------------------------------------------------------------------------------------------------------------------------------------------------------------------------------------------------------------------------|
|                            |                                   | nicotinic acid sequestering agent.<br>Therapeutic goals: LDLc < 1.8 mmol/l or reduction ≥ 50% of the initial LDL-c level.                                                                                                                                                                                                                                                                                                                                                                                                                                                                                                                                                                                                                                                                                                                                                                                                                                                                                                                                                                                                                                                                         |
|                            | <b>References</b>                 | ACC/AHA 2013: Guideline on the Treatment of Blood Cholesterol to Reduce Atherosclerotic Cardiovascular Risk in Adults: <a href="http://circ.ahajournals.org/content/early/2013/11/11/01.cir.0000437738.63853.7a.full.pdf">http://circ.ahajournals.org/content/early/2013/11/11/01.cir.0000437738.63853.7a.full.pdf</a><br>ACCF/AHA 2013: Guideline for the Management of ST-Elevation Myocardial Infarction: <a href="https://circ.ahajournals.org/content/127/4/e362.full.pdf">https://circ.ahajournals.org/content/127/4/e362.full.pdf</a><br>ESC 2012: Acute Myocardial Infarction in patients presenting with ST-segment elevation (Management of): <a href="http://www.escardio.org/guidelines-surveys/esc-guidelines/GuidelinesDocuments/AMI-STEMI.aspx">http://www.escardio.org/guidelines-surveys/esc-guidelines/GuidelinesDocuments/AMI-STEMI.aspx</a><br>ESC 2011: Acute Coronary Syndromes (ACS) in patients presenting without persistent ST-segment elevation (Management of): <a href="http://www.escardio.org/guidelines-surveys/esc-guidelines/GuidelinesDocuments/ACS-2011.aspx">http://www.escardio.org/guidelines-surveys/esc-guidelines/GuidelinesDocuments/ACS-2011.aspx</a> |
|                            | <b>Strength of recommendation</b> | Experts median agreement: strongly agree % of experts agree or strongly agree: 97.4 %<br>Median usefulness rating: very useful % of experts rating items useful or very useful: 94.9 %                                                                                                                                                                                                                                                                                                                                                                                                                                                                                                                                                                                                                                                                                                                                                                                                                                                                                                                                                                                                            |
|                            | <b>Rational</b>                   | Low, but significant reduction of 30 days mortality. Modest long-term efficacy in patients with no associated pathology.                                                                                                                                                                                                                                                                                                                                                                                                                                                                                                                                                                                                                                                                                                                                                                                                                                                                                                                                                                                                                                                                          |
|                            | <b>Recommendations</b>            | Monitor renal function and kalaemia.<br>* <u>Non-exhaustive list of exacerbating factors</u> : presence of HF, reduced LVEF, diabetes, prior myocardial infarction, high blood pressure or renal impairment.<br><u>Alternatives</u> : in case of ACEI intolerance, an ARB (preferably valsartan) can be prescribed.                                                                                                                                                                                                                                                                                                                                                                                                                                                                                                                                                                                                                                                                                                                                                                                                                                                                               |
| 16<br>UP                   | <b>References</b>                 | ACCF/AHA 2013: Guideline for the Management of ST-Elevation Myocardial Infarction: <a href="https://circ.ahajournals.org/content/127/4/e362.full.pdf">https://circ.ahajournals.org/content/127/4/e362.full.pdf</a><br>ESC 2012: Acute Myocardial Infarction in patients presenting with ST-segment elevation (Management of): <a href="http://www.escardio.org/guidelines-surveys/esc-guidelines/GuidelinesDocuments/AMI-STEMI.aspx">http://www.escardio.org/guidelines-surveys/esc-guidelines/GuidelinesDocuments/AMI-STEMI.aspx</a><br>ESC 2011: Acute Coronary Syndromes (ACS) in patients presenting without persistent ST-segment elevation (Management of): <a href="http://www.escardio.org/guidelines-surveys/esc-guidelines/GuidelinesDocuments/ACS-2011.aspx">http://www.escardio.org/guidelines-surveys/esc-guidelines/GuidelinesDocuments/ACS-2011.aspx</a>                                                                                                                                                                                                                                                                                                                           |
|                            | <b>Strength of recommendation</b> | Experts median agreement: strongly agree % of experts agree or strongly agree: 100 %<br>Median usefulness rating: very useful % of experts rating items useful or very useful: 92.3 %                                                                                                                                                                                                                                                                                                                                                                                                                                                                                                                                                                                                                                                                                                                                                                                                                                                                                                                                                                                                             |
| <b>HIGH BLOOD PRESSURE</b> |                                   |                                                                                                                                                                                                                                                                                                                                                                                                                                                                                                                                                                                                                                                                                                                                                                                                                                                                                                                                                                                                                                                                                                                                                                                                   |
|                            | <b>Rational</b>                   | Management of cardiovascular risk factors and decreased mortality.                                                                                                                                                                                                                                                                                                                                                                                                                                                                                                                                                                                                                                                                                                                                                                                                                                                                                                                                                                                                                                                                                                                                |
|                            | <b>Recommendations</b>            | <u>Systolic BP (sBP) &lt; 140 mmHg</u> : diabetes, chronic kidney failure (CKF), history of stroke or transient ischaemic attack, patients with cardiovascular risk, or heart disease.<br><u>sBP 140–150 mmHg</u> : patient > 65 years (except in case of orthostatic hypotension).<br><u>Diastolic BP (dBp) &lt; 90 mmHg</u> : for all patients (optionally in case of diabetes: dBp < 85 mmHg).                                                                                                                                                                                                                                                                                                                                                                                                                                                                                                                                                                                                                                                                                                                                                                                                 |
|                            | <b>Remarks</b>                    | * <u>First-line drugs to treat HBP</u> : thiazide diuretics (chlorthalidone, hydrochlorothiazide, indapamide), ACEI, ARB, calcium inhibitors.<br>Beta-blockers are no longer recommended by the Joint National Committee (JNC 8) as 1 <sup>st</sup> line to treat HBP in the non-black general population.<br>In case of bi-therapy, fixed combinations should be favoured in order to improve patient observance.<br>** <u>Pharmacological measures</u> are recommended in adults < 60 years when the BP is > 140/90 mmHg) subject to the quality of the diagnosis in a hospitalisation context for acute affection.<br>*** <u>Lifestyle and diet modifications</u> : decrease salt consumption (5–6 g/day), decrease alcohol consumption, increase fruit and vegetable intake, engage in regular physical activity (30 minutes/day, 5 to 7 days/week), counselling/assistance to quit tobacco use, weight loss and decreased waist size (body mass index < 25 kg/m <sup>2</sup> , waist size < 102 cm in men and < 88 cm in women).                                                                                                                                                             |
| 17<br>UP                   | <b>References</b>                 | Joint National Committee (JNC 8) 2014: Management of High Blood Pressure in Adults: <a href="http://jama.jamanetwork.com/article.aspx?articleid=1791497">http://jama.jamanetwork.com/article.aspx?articleid=1791497</a><br>ESH/ESC 2013: Arterial Hypertension (Management of): <a href="http://eurheartj.oxfordjournals.org/content/34/28/2159.full.pdf">http://eurheartj.oxfordjournals.org/content/34/28/2159.full.pdf</a><br>PECH 2014 : Programme Éducatif Canadien sur l'Hypertension : <a href="http://www.hypertension.ca/images/CHEP_2014/2014_CompleteCHEPRecommendations_FR_HCP1009.pdf">http://www.hypertension.ca/images/CHEP_2014/2014_CompleteCHEPRecommendations_FR_HCP1009.pdf</a>                                                                                                                                                                                                                                                                                                                                                                                                                                                                                               |
|                            | <b>Strength of recommendation</b> | Experts median agreement: strongly agree % of experts agree or strongly agree: 100 %<br>Median usefulness rating: very useful % of experts rating items useful or very useful: 97.4 %                                                                                                                                                                                                                                                                                                                                                                                                                                                                                                                                                                                                                                                                                                                                                                                                                                                                                                                                                                                                             |
|                            | <b>Rational</b>                   | Nephroprotective effect, improved prognosis in HF and many clinical trials conducted for these indications.                                                                                                                                                                                                                                                                                                                                                                                                                                                                                                                                                                                                                                                                                                                                                                                                                                                                                                                                                                                                                                                                                       |
| 18<br>Other                | <b>References</b>                 | Joint National Committee (JNC 8) 2014: Management of High Blood Pressure in Adults: <a href="http://jama.jamanetwork.com/article.aspx?articleid=1791497">http://jama.jamanetwork.com/article.aspx?articleid=1791497</a>                                                                                                                                                                                                                                                                                                                                                                                                                                                                                                                                                                                                                                                                                                                                                                                                                                                                                                                                                                           |

|                                                                 |                                   |                                                                                                                                                                                                                                                                                                                                                                                                                                                                                                                                                                                                                                                                                                                                                                                                                                                                                                                 |
|-----------------------------------------------------------------|-----------------------------------|-----------------------------------------------------------------------------------------------------------------------------------------------------------------------------------------------------------------------------------------------------------------------------------------------------------------------------------------------------------------------------------------------------------------------------------------------------------------------------------------------------------------------------------------------------------------------------------------------------------------------------------------------------------------------------------------------------------------------------------------------------------------------------------------------------------------------------------------------------------------------------------------------------------------|
|                                                                 |                                   | ESH/ESC 2013: Arterial Hypertension (Management of):<br><a href="http://eurheartj.oxfordjournals.org/content/34/28/2159.full.pdf">http://eurheartj.oxfordjournals.org/content/34/28/2159.full.pdf</a><br>PECH 2014 : Programme Éducatif Canadien sur l'Hypertension :<br><a href="http://www.hypertension.ca/images/CHPEP_2014/2014_CompleteCHPEPRecommendations_FR_HCP1009.pdf">http://www.hypertension.ca/images/CHPEP_2014/2014_CompleteCHPEPRecommendations_FR_HCP1009.pdf</a>                                                                                                                                                                                                                                                                                                                                                                                                                              |
|                                                                 | <b>Strength of recommendation</b> | Experts median agreement: strongly agree % of experts agree or strongly agree: 100 %<br>Median usefulness rating: very useful % of experts rating items useful or very useful: 100 %                                                                                                                                                                                                                                                                                                                                                                                                                                                                                                                                                                                                                                                                                                                            |
| 19<br>UP                                                        | <b>Rational</b>                   | Management of cardiovascular risk factors and HBP complications.                                                                                                                                                                                                                                                                                                                                                                                                                                                                                                                                                                                                                                                                                                                                                                                                                                                |
|                                                                 | <b>Remarks</b>                    | * <b>Aldosterone antagonists:</b> spironolactone or eplerenone.<br>Monitoring of kalaemia is recommended in case of combination with an ACEI or ARB.<br>Monitor risk of orthostatic hypotension with alpha-1-blockers.<br>**A resistant HBP is defined by a BP > 140–90 mmHg, despite appropriate lifestyle and dietary measures, combined with treatment with a diuretic + two other antihypertensive agents belonging to different classes, at appropriate doses and with good drug observance.                                                                                                                                                                                                                                                                                                                                                                                                               |
|                                                                 | <b>References</b>                 | ESH/ESC 2013: Arterial Hypertension (Management of):<br><a href="http://eurheartj.oxfordjournals.org/content/34/28/2159.full.pdf">http://eurheartj.oxfordjournals.org/content/34/28/2159.full.pdf</a><br>Vaclavik J, et al. Addition of spironolactone in patients with resistant arterial hypertension (ASPIRANT): a randomized, double blind, placebo-controlled trial. Hypertension 2011:<br><a href="http://hyper.ahajournals.org/content/57/6/1069.full.pdf">http://hyper.ahajournals.org/content/57/6/1069.full.pdf</a>                                                                                                                                                                                                                                                                                                                                                                                   |
|                                                                 | <b>Strength of recommendation</b> | Experts median agreement: agree % of experts agree or strongly agree: 89.7 %<br>Median usefulness rating: useful % of experts rating items useful or very useful: 79.5 %                                                                                                                                                                                                                                                                                                                                                                                                                                                                                                                                                                                                                                                                                                                                        |
| 20<br>OP                                                        | <b>Rational</b>                   | Risk of BP destabilization.                                                                                                                                                                                                                                                                                                                                                                                                                                                                                                                                                                                                                                                                                                                                                                                                                                                                                     |
|                                                                 | <b>Recommendation</b>             | Favour a therapeutic alternative when available or reinforce blood pressure monitoring if use is necessary in these patients.                                                                                                                                                                                                                                                                                                                                                                                                                                                                                                                                                                                                                                                                                                                                                                                   |
|                                                                 | <b>Remarks</b>                    | * <b>Non-exhaustive list of drugs that may increase the blood pressure:</b> ACTH, NSAIDs and COX2-inhibitor, anti-calcineurins (cyclosporine, tacrolimus), bromocriptine, buspirone, some antidepressants (venlafaxine, duloxetine, atomoxetine, MAOIs), carbamazepine, clonidine, clozapine, corticosteroids, ergot derivatives, desflurane, erythropoietin, ketamine, metoclopramide, oestrogens (oral oestrogen contraceptives), paracetamol/acetaminophen, sibutramine, sympathomimetics (ex: ephedrine, naphazoline, phenylephrine, phenylpropanolamine, pseudoephedrine, synephrine), triptans.<br>** <b>Non-exhaustive list of sodium-rich drugs:</b> sodium alginate, bicarbonate, biphosphate, citrate, effervescent drugs, fosfomycin, phosphate, salicylate, sulphate.                                                                                                                               |
|                                                                 | <b>References</b>                 | NIH/ NHLBI 2004: The Seventh Report of the Joint National Committee on Prevention, Detection, Evaluation, and Treatment of High Blood Pressure: <a href="http://www.nhlbi.nih.gov/guidelines/hypertension/jnc7full.pdf">http://www.nhlbi.nih.gov/guidelines/hypertension/jnc7full.pdf</a><br>AHA 2007: Use of Nonsteroidal Antiinflammatory Drugs: <a href="http://circ.ahajournals.org/content/115/12/1634.full.pdf">http://circ.ahajournals.org/content/115/12/1634.full.pdf</a><br>BMJ 2013: cardiovascular events and sodium containing effervescent, dispersible, and soluble drugs: <a href="http://www.bmj.com/highwire/filestream/674373/field_highwire_article_pdf/0/bmj.f6954">http://www.bmj.com/highwire/filestream/674373/field_highwire_article_pdf/0/bmj.f6954</a><br>Prescrire le Guide. Éviter les effets indésirables par interactions médicamenteuses – Comprendre et décider (Janvier 2013) |
|                                                                 | <b>Strength of recommendation</b> | Experts median agreement: agree % of experts agree or strongly agree: 92.3 %<br>Median usefulness rating: useful % of experts rating items useful or very useful: 76.9 %                                                                                                                                                                                                                                                                                                                                                                                                                                                                                                                                                                                                                                                                                                                                        |
|                                                                 |                                   | <b>Rational</b>                                                                                                                                                                                                                                                                                                                                                                                                                                                                                                                                                                                                                                                                                                                                                                                                                                                                                                 |
| 21<br>OP                                                        | <b>Remark</b>                     | Loop diuretics may potentially replace other types of antihypertensive diuretics in case of chronic kidney disease with CrCl < 30 ml/min.                                                                                                                                                                                                                                                                                                                                                                                                                                                                                                                                                                                                                                                                                                                                                                       |
|                                                                 | <b>References</b>                 | JNC8 2014: Management of High Blood Pressure in Adults:<br><a href="http://jama.jamanetwork.com/article.aspx?articleid=1791497">http://jama.jamanetwork.com/article.aspx?articleid=1791497</a><br>ESH/ESC 2013: Arterial Hypertension (Management of):<br><a href="http://eurheartj.oxfordjournals.org/content/34/28/2159.full.pdf">http://eurheartj.oxfordjournals.org/content/34/28/2159.full.pdf</a>                                                                                                                                                                                                                                                                                                                                                                                                                                                                                                         |
|                                                                 | <b>Strength of recommendation</b> | Experts median agreement: strongly agree % of experts agree or strongly agree: 92.3 %<br>Median usefulness rating: useful % of experts rating items useful or very useful: 87.2 %                                                                                                                                                                                                                                                                                                                                                                                                                                                                                                                                                                                                                                                                                                                               |
| <b>NON-CARDIOEMBOLIC STROKE and TRANSIENT ISCHAEMIC ATTACKS</b> |                                   |                                                                                                                                                                                                                                                                                                                                                                                                                                                                                                                                                                                                                                                                                                                                                                                                                                                                                                                 |
| 22<br>UP                                                        | <b>Rational</b>                   | Patients with the risk of cerebrovascular and cardiovascular recurrence.                                                                                                                                                                                                                                                                                                                                                                                                                                                                                                                                                                                                                                                                                                                                                                                                                                        |
|                                                                 | <b>References</b>                 | AHA/ASA 2013: Early Management of Patients With Acute Ischemic Stroke:<br><a href="http://stroke.ahajournals.org/content/early/2013/01/31/STR.0b013e318284056a.full.pdf">http://stroke.ahajournals.org/content/early/2013/01/31/STR.0b013e318284056a.full.pdf</a><br>AHA/ASA 2011: Prevention of Stroke in Patients With Stroke or Transient Ischemic Attack:<br><a href="https://stroke.ahajournals.org/content/42/1/227.full.pdf">https://stroke.ahajournals.org/content/42/1/227.full.pdf</a><br>ESC 2011: Dyslipidaemias (Management of): <a href="http://www.escardio.org/guidelines-surveys/esc-guidelines/GuidelinesDocuments/Dyslipidaemias-2011.aspx">http://www.escardio.org/guidelines-surveys/esc-guidelines/GuidelinesDocuments/Dyslipidaemias-2011.aspx</a>                                                                                                                                       |

|                                                             |                                   |                                                                                                                                                                                                                                                                                                                                                                                                                                                                                                                                                                                                                                                                                                                                                                                                                                                         |                                                                                                         |
|-------------------------------------------------------------|-----------------------------------|---------------------------------------------------------------------------------------------------------------------------------------------------------------------------------------------------------------------------------------------------------------------------------------------------------------------------------------------------------------------------------------------------------------------------------------------------------------------------------------------------------------------------------------------------------------------------------------------------------------------------------------------------------------------------------------------------------------------------------------------------------------------------------------------------------------------------------------------------------|---------------------------------------------------------------------------------------------------------|
|                                                             | <b>Strength of recommendation</b> | Experts median agreement: strongly agree<br>Median usefulness rating: useful                                                                                                                                                                                                                                                                                                                                                                                                                                                                                                                                                                                                                                                                                                                                                                            | % of experts agree or strongly agree: 97.4 %<br>% of experts rating items useful or very useful: 97.4 % |
| 23<br>UP                                                    | <b>Rational</b>                   | Patients with the risk of cerebrovascular and cardiovascular recurrence.                                                                                                                                                                                                                                                                                                                                                                                                                                                                                                                                                                                                                                                                                                                                                                                |                                                                                                         |
|                                                             | <b>Recommendation</b>             | * <u>Non-exhaustive list of recommended antiplatelet therapy</u> : low-dose aspirin (75–160 mg QD) or clopidogrel (75 mg QD).                                                                                                                                                                                                                                                                                                                                                                                                                                                                                                                                                                                                                                                                                                                           |                                                                                                         |
|                                                             | <b>Reference</b>                  | ACCP 2012: Antithrombotic and Thrombolytic Therapy for Ischemic Stroke:<br><a href="http://journal.publications.chestnet.org/data/Journals/CHEST/23443/112302.pdf">http://journal.publications.chestnet.org/data/Journals/CHEST/23443/112302.pdf</a>                                                                                                                                                                                                                                                                                                                                                                                                                                                                                                                                                                                                    |                                                                                                         |
|                                                             | <b>Strength of recommendation</b> | Experts median agreement: strongly agree<br>Median usefulness rating: very useful                                                                                                                                                                                                                                                                                                                                                                                                                                                                                                                                                                                                                                                                                                                                                                       | % of experts agree or strongly agree: 100 %<br>% of experts rating items useful or very useful: 97.4 %  |
| <b>ARRHYTHMIAS, ATRIAL FIBRILLATION and ANTIARRHYTHMICS</b> |                                   |                                                                                                                                                                                                                                                                                                                                                                                                                                                                                                                                                                                                                                                                                                                                                                                                                                                         |                                                                                                         |
| 24<br>Other                                                 | <b>Rational</b>                   | Drugs with a narrow therapeutic window. Risk of toxicity in case of overdose. Digoxin toxicity increased by a decline in renal function.                                                                                                                                                                                                                                                                                                                                                                                                                                                                                                                                                                                                                                                                                                                |                                                                                                         |
|                                                             | <b>Recommendations</b>            | Monitor the occurrence of rhythm disorders (ventricular arrhythmia, atrioventricular blocks, etc.).<br><u>Suggested dose</u> : 125 µg QD (62.5 µg QD in elderly patients), do not to exceed 250 µg QD. The digoxinemia should be < 1 ng/ml (< 1.3 nmol/l).<br>In case of digitalis poisoning or signs of poisoning (ex: fever, nausea/vomiting, colour distortion, etc.) temporarily discontinue digitalis +/- administer an anti-digitalis antibody, depending on the serum digoxin level and cardiac/haemodynamic manifestations.                                                                                                                                                                                                                                                                                                                     |                                                                                                         |
|                                                             | <b>Remark</b>                     | <u>Non-exhaustive list of molecules that may interact with digoxin</u> : see item 25.                                                                                                                                                                                                                                                                                                                                                                                                                                                                                                                                                                                                                                                                                                                                                                   |                                                                                                         |
|                                                             | <b>References</b>                 | ESC 2012: Acute and Chronic Heart Failure:<br><a href="http://eurheartj.oxfordjournals.org/content/33/14/1787.full.pdf?bsci_scan_628cd39dca2568d2=xWJ7tj2YrRfO5fphQuC5p247toBAAAAd3H7AA==&amp;bsci_scan_filename=1787.full.pdf">http://eurheartj.oxfordjournals.org/content/33/14/1787.full.pdf?bsci_scan_628cd39dca2568d2=xWJ7tj2YrRfO5fphQuC5p247toBAAAAd3H7AA==&amp;bsci_scan_filename=1787.full.pdf</a><br>HFSA 2010: Comprehensive Heart Failure Practice Guideline:<br><a href="http://www.heartfailureguideline.org/assets/document/Guidelines.pdf">http://www.heartfailureguideline.org/assets/document/Guidelines.pdf</a><br>ACC/AHA/ESC 2006: Management of Patients With Ventricular Arrhythmias:<br><a href="http://content.onlinejacc.org/article.aspx?articleid=1137887">http://content.onlinejacc.org/article.aspx?articleid=1137887</a> |                                                                                                         |
|                                                             | <b>Strength of recommendation</b> | Experts median agreement: strongly agree<br>Median usefulness rating: very useful                                                                                                                                                                                                                                                                                                                                                                                                                                                                                                                                                                                                                                                                                                                                                                       | % of experts agree or strongly agree: 94.9 %<br>% of experts rating items useful or very useful: 92.3 % |
| 25<br>DDI                                                   | <b>Rational</b>                   | Drug with narrow therapeutic window, substrate of P-glycoprotein. Risk of overdose and toxicity.                                                                                                                                                                                                                                                                                                                                                                                                                                                                                                                                                                                                                                                                                                                                                        |                                                                                                         |
|                                                             | <b>Recommendations</b>            | Monitor the serum digoxin level and signs of overdose*.<br>*In case of digitalis poisoning or signs of poisoning (ex: fever, nausea/vomiting, colour distortion, etc.) temporarily discontinue digitalis +/- administer an anti-digitalis antibody, depending on the serum digoxin level and cardiac/haemodynamic manifestations.                                                                                                                                                                                                                                                                                                                                                                                                                                                                                                                       |                                                                                                         |
|                                                             | <b>Remark</b>                     | <u>Non-exhaustive list of molecules that may inhibit Pgp</u> : amiodarone, atorvastatin, certain ARVs, cyclosporine, ketoconazole, macrolides (clarithromycin+++), nalmefene, quinidine, verapamil.                                                                                                                                                                                                                                                                                                                                                                                                                                                                                                                                                                                                                                                     |                                                                                                         |
|                                                             | <b>Useful link</b>                | HUG 2014: Drug interactions, cytochromes P450 and P-glycoprotein (Pgp): <a href="http://www.hug-ge.ch/sites/interhug/files/structures/pharmacologie_et_toxicologie_cliniques/documents/interactions_medicamenteuses_et_cyp450.pdf">http://www.hug-ge.ch/sites/interhug/files/structures/pharmacologie_et_toxicologie_cliniques/documents/interactions_medicamenteuses_et_cyp450.pdf</a>                                                                                                                                                                                                                                                                                                                                                                                                                                                                 |                                                                                                         |
|                                                             | <b>References</b>                 | Akhtar N, et al. The emerging role of P-glycoprotein inhibitors in drug delivery: a patent review Expert Opin. Ther. Patents 2011 [abstract]: <a href="http://informahealthcare.com/doi/abs/10.1517/13543776.2011.561784">http://informahealthcare.com/doi/abs/10.1517/13543776.2011.561784</a><br>DuBuske L. The Role of P-Glycoprotein and Organic Anion-Transporting Polypeptides in Drug Interactions. Drug Safety 2005 [abstract]: <a href="http://link.springer.com/article/10.2165/00002018-200528090-00004">http://link.springer.com/article/10.2165/00002018-200528090-00004</a>                                                                                                                                                                                                                                                               |                                                                                                         |
|                                                             | <b>Strength of recommendation</b> | Experts median agreement: strongly agree<br>Median usefulness rating: very useful                                                                                                                                                                                                                                                                                                                                                                                                                                                                                                                                                                                                                                                                                                                                                                       | % of experts agree or strongly agree: 94.9 %<br>% of experts rating items useful or very useful: 89.7 % |
| 26<br>UP                                                    | <b>Rational</b>                   | Prevention of thromboembolic events and risk of stroke.<br>Target INR = 2.5: VKA optimal safe/effective intensity in nonvalvular AF (the average of the last 5 INRs should ideally be 2.5).                                                                                                                                                                                                                                                                                                                                                                                                                                                                                                                                                                                                                                                             |                                                                                                         |
|                                                             | <b>Recommendations</b>            | * <u>Select an oral anticoagulant from among</u> : VKA, dabigatran, rivaroxaban and apixaban, depending on the patient's risk factors (age, weight, renal function, anticipated observance quality, patient's preferences after appropriate information, price, tolerance, potential drug interactions and clinical characteristics).<br><br>Take potential contraindications into account, specificities of the patient, and in particular haemorrhage risk (HAS-BLED score***) into account.                                                                                                                                                                                                                                                                                                                                                          |                                                                                                         |



|             |                                   |                                                                                                                                                                                                                                                                                                                                                                                                                                                                                                                                                                                                                                                                                                                                                                                                                                                                                                                                                                                                                                                                                                                                                                |
|-------------|-----------------------------------|----------------------------------------------------------------------------------------------------------------------------------------------------------------------------------------------------------------------------------------------------------------------------------------------------------------------------------------------------------------------------------------------------------------------------------------------------------------------------------------------------------------------------------------------------------------------------------------------------------------------------------------------------------------------------------------------------------------------------------------------------------------------------------------------------------------------------------------------------------------------------------------------------------------------------------------------------------------------------------------------------------------------------------------------------------------------------------------------------------------------------------------------------------------|
|             | <b>Remarks</b>                    | *Favour the OR unless it is not available or in case of suspected malabsorption: cholestasis, absorption disorders, etc.                                                                                                                                                                                                                                                                                                                                                                                                                                                                                                                                                                                                                                                                                                                                                                                                                                                                                                                                                                                                                                       |
|             | <b>References</b>                 | ACCP 2012: Antithrombotic Therapy and Prevention of Thrombosis: <a href="http://journal.publications.chestnet.org/data/Journals/CHEST/23443/112292.pdf">http://journal.publications.chestnet.org/data/Journals/CHEST/23443/112292.pdf</a><br>HAS 2008 : Recommendations professionnelles Prise en charge des surdosages en antivitamines K : <a href="http://www.has-sante.fr/portail/upload/docs/application/pdf/2008-10/jlestv-20-32-s300.pdf">http://www.has-sante.fr/portail/upload/docs/application/pdf/2008-10/jlestv-20-32-s300.pdf</a>                                                                                                                                                                                                                                                                                                                                                                                                                                                                                                                                                                                                                 |
|             | <b>Strength of recommendation</b> | Experts median agreement: strongly agree % of experts agree or strongly agree: 97.4 %<br>Median usefulness rating: very useful % of experts rating items useful or very useful: 97.4 %                                                                                                                                                                                                                                                                                                                                                                                                                                                                                                                                                                                                                                                                                                                                                                                                                                                                                                                                                                         |
| 30<br>OP    | <b>Rational</b>                   | Therapeutic alternative to VKA.<br>DOACs can be considered to newly anticoagulated patients.<br>Effective and well-tolerated VKA treatment should not systematically be replaced by a DOAC.                                                                                                                                                                                                                                                                                                                                                                                                                                                                                                                                                                                                                                                                                                                                                                                                                                                                                                                                                                    |
|             | <b>Recommendations</b>            | In case of altered renal function or CrCl < 30 ml/min, favour VKA.<br>Caution should be exercised in patients with a CrCl < 30 ml/min.<br>Apixaban and rivaroxaban: not advised if CrCl < 15 ml/min.<br>Dabigatran: contraindicated if CrCl < 30 ml/min.                                                                                                                                                                                                                                                                                                                                                                                                                                                                                                                                                                                                                                                                                                                                                                                                                                                                                                       |
|             | <b>Reference</b>                  | HAS 2013 : place pour les anticoagulants oraux non antivitamine K : <a href="http://www.has-sante.fr/portail/upload/docs/application/pdf/2013-07/fs_bum_naco_v5.pdf">http://www.has-sante.fr/portail/upload/docs/application/pdf/2013-07/fs_bum_naco_v5.pdf</a>                                                                                                                                                                                                                                                                                                                                                                                                                                                                                                                                                                                                                                                                                                                                                                                                                                                                                                |
|             | <b>Strength of recommendation</b> | Experts median agreement: agree % of experts agree or strongly agree: 92.3 %<br>Median usefulness rating: useful % of experts rating items useful or very useful: 84.6 %                                                                                                                                                                                                                                                                                                                                                                                                                                                                                                                                                                                                                                                                                                                                                                                                                                                                                                                                                                                       |
| 31<br>Other | <b>Rational</b>                   | Dosing regimen should be adapted in case of renal impairment.                                                                                                                                                                                                                                                                                                                                                                                                                                                                                                                                                                                                                                                                                                                                                                                                                                                                                                                                                                                                                                                                                                  |
|             | <b>Recommendation</b>             | *Annual evaluation of renal function if the CrCl is > 50 ml/min and 2 to 3 times/year if CrCl < 50 ml/min or as needed if there is a factor that may alter the renal function.                                                                                                                                                                                                                                                                                                                                                                                                                                                                                                                                                                                                                                                                                                                                                                                                                                                                                                                                                                                 |
|             | <b>Remarks</b>                    | Exercise caution in all patients with a CrCl < 30 ml/min.<br>Apixaban and rivaroxaban: not advised if CrCl < 15 ml/min.<br>Dabigatran: contraindicated if CrCl < 30 ml/min.                                                                                                                                                                                                                                                                                                                                                                                                                                                                                                                                                                                                                                                                                                                                                                                                                                                                                                                                                                                    |
|             | <b>Reference</b>                  | ESC 2012: Atrial Fibrillation (Management of) 2010 and Focused Update (2012): <a href="http://eurheartj.oxfordjournals.org/content/33/21/2719.full.pdf?bcsi_scan_628cd39dca2568d2=eM0DijTKfWNaBCsl4e4u+KGG4dEBAAAA/TR0BQ==&amp;bcsi_scan_filename=2719.full.pdf">http://eurheartj.oxfordjournals.org/content/33/21/2719.full.pdf?bcsi_scan_628cd39dca2568d2=eM0DijTKfWNaBCsl4e4u+KGG4dEBAAAA/TR0BQ==&amp;bcsi_scan_filename=2719.full.pdf</a>                                                                                                                                                                                                                                                                                                                                                                                                                                                                                                                                                                                                                                                                                                                  |
|             | <b>Strength of recommendation</b> | Experts median agreement: strongly agree % of experts agree or strongly agree: 97.4 %<br>Median usefulness rating: very useful % of experts rating items useful or very useful: 94.9 %                                                                                                                                                                                                                                                                                                                                                                                                                                                                                                                                                                                                                                                                                                                                                                                                                                                                                                                                                                         |
| 32<br>DDI   | <b>Rational</b>                   | Risks of bleeding or thrombosis in case of unbalanced anticoagulant treatment.                                                                                                                                                                                                                                                                                                                                                                                                                                                                                                                                                                                                                                                                                                                                                                                                                                                                                                                                                                                                                                                                                 |
|             | <b>Recommendations</b>            | Monitor INR for VKA, adapt dosing regimen, monitor side effects, etc.                                                                                                                                                                                                                                                                                                                                                                                                                                                                                                                                                                                                                                                                                                                                                                                                                                                                                                                                                                                                                                                                                          |
|             | <b>Remarks</b>                    | * <u>Non-exhaustive list of interactions:</u><br><u>Common:</u> antiplatelet drugs, NSAIDs, COX2-inhibitor, heparins, anticoagulants with each other, rifampicin, ketoconazole.<br><u>With VKA:</u> CYP450 inducers, inhibitors (the cytochromes involved in the metabolism differ based on the molecule), antibiotics (major: ciprofloxacin, cotrimoxazole, erythromycin, metronidazole, isoniazid, ribavirin), antifungal azoles (major: fluconazole, vaginal miconazole, voriconazole), amiodarone, propafenone, diltiazem, propranolol, SSRIs, paracetamol/acetaminophen, fluvastatin, simvastatin, atorvastatin, clofibrate, fenofibrate, gemfibrozil.<br><u>With dabigatran:</u> clarithromycin, Pgp inhibitors** (amiodarone, quinidine, verapamil), drugs increasing gastric pH (antacids, pantoprazole).<br><u>With rivaroxaban:</u> CYP450 and P-glycoprotein inducers, inhibitors**, certain anti-epileptics (phenytoin, carbamazepine, phenobarbital, azole antifungals (itraconazole, voriconazole, posaconazole), ritonavir.<br><u>With apixaban:</u> common interactions with anticoagulants, CYP450 and P-glycoprotein inducers, inhibitors**. |
|             | <b>Useful link</b>                | **HUG 2014: Drug interactions, cytochromes P450 and P-glycoprotein (Pgp): <a href="http://www.hug-ge.ch/sites/interhug/files/structures/pharmacologie_et_toxicologie_cliniques/documents/interactions_medicamenteuses_et_cyp450.pdf">http://www.hug-ge.ch/sites/interhug/files/structures/pharmacologie_et_toxicologie_cliniques/documents/interactions_medicamenteuses_et_cyp450.pdf</a>                                                                                                                                                                                                                                                                                                                                                                                                                                                                                                                                                                                                                                                                                                                                                                      |
|             | <b>References</b>                 | Juurlink D. Drug interactions with warfarin: what clinicians need to know. CMAJ 2007: <a href="http://www.cmaj.ca/content/177/4/369.full.pdf">http://www.cmaj.ca/content/177/4/369.full.pdf</a><br>Schelleman H, et al. Fibrate/Statin Initiation in Warfarin Users and Gastrointestinal Bleeding Risk. Am Journal of Med 2010: <a href="http://www.ncbi.nlm.nih.gov/pmc/articles/PMC2813204/pdf/nihms149616.pdf">http://www.ncbi.nlm.nih.gov/pmc/articles/PMC2813204/pdf/nihms149616.pdf</a>                                                                                                                                                                                                                                                                                                                                                                                                                                                                                                                                                                                                                                                                  |

Nutescu E, et al. Drug and dietary interactions of warfarin and novel oral anticoagulants: an update. J Thromb Thrombolysis 2011: [ftp://mtr26-1-82-239-144-183.fbx.proxad.net/bibli-%20Revue%20Articles%20FB/Biblio%20110316%20rout%E9e/74.1104-Drug%20and%20dietary%20interactions%20of%20warfarin%20and%20novel%20oral%20anticoagulants.%20An%20update\\_Nutescu.%20JT.pdf](ftp://mtr26-1-82-239-144-183.fbx.proxad.net/bibli-%20Revue%20Articles%20FB/Biblio%20110316%20rout%E9e/74.1104-Drug%20and%20dietary%20interactions%20of%20warfarin%20and%20novel%20oral%20anticoagulants.%20An%20update_Nutescu.%20JT.pdf)

**Strength of recommendation** Experts median agreement: strongly agree % of experts agree or strongly agree: 97.4 %  
Median usefulness rating: very useful % of experts rating items useful or very useful: 92.3 %

### DEEP VEIN THROMBOSIS, PULMONARY EMBOLISM, VENUS THROMBOEMBOLISM

33  
UP

**Rational** Prevention of relapses.  
Target INR = 2.5: VKA optimal safe/effective intensity in DVT and PE (the average of the last 5 INRs should ideally be 2.5).

**Recommendations** Adjust the treatment duration based on the gravity:  
- DVT or PE caused by a temporary risk factor = 3 months.  
- Idiopathic DVT or PE, combined with cancer or in case of second episode: treatment > 3 months, or long-term treatment.

In case of heparin/VKA relay, the INR should be located, 2 consecutive times, within the desired values before stopping heparin.  
Recommended molecules: Heparin, VKA, and DOAC.

**References** ACCP 2012: Antithrombotic Therapy and Prevention of Thrombosis, 9th ed: [http://journal.publications.chestnet.org/data/Journals/CHEST/23443/chest\\_141\\_2\\_suppl\\_e419S.pdf](http://journal.publications.chestnet.org/data/Journals/CHEST/23443/chest_141_2_suppl_e419S.pdf)  
AFSSAPS 2009 : Prévention et traitement de la maladie thromboembolique veineuse en médecine : [http://www.sfm.org/documents/consensus/RBP\\_thrombose.pdf](http://www.sfm.org/documents/consensus/RBP_thrombose.pdf)

**Strength of recommendation** Experts median agreement: strongly agree % of experts agree or strongly agree: 100 %  
Median usefulness rating: very useful % of experts rating items useful or very useful: 92.3 %

34  
UP

**Rational** High risk of relapse.  
Target INR = 2.5: VKA optimal safe/effective intensity in VTE (the average of the last 5 INRs should ideally be 2.5).

**Recommendation** Long-term treatment with annual re-evaluation.

**Remarks** \*Non-exhaustive list of major risk factors: extended immobilisation, active cancers, hereditary coagulation disorder (anti-thrombin deficiency, S protein deficiency, C protein deficiency, etc.).

**References** ACCP 2012: Antithrombotic Therapy and Prevention of Thrombosis, 9th ed: [http://journal.publications.chestnet.org/data/Journals/CHEST/23443/chest\\_141\\_2\\_suppl\\_e419S.pdf](http://journal.publications.chestnet.org/data/Journals/CHEST/23443/chest_141_2_suppl_e419S.pdf)  
AFSSAPS 2009 : Prévention et traitement de la maladie thromboembolique veineuse en médecine : [http://www.sfm.org/documents/consensus/RBP\\_thrombose.pdf](http://www.sfm.org/documents/consensus/RBP_thrombose.pdf)  
Kearon C, et al. Management of patients with hereditary Hypercoagulable disorders. Annu Rev Med 2000 [abstract]: <http://www.annualreviews.org/doi/abs/10.1146/annurev.med.51.1.169?journalCode=med>

**Strength of recommendation** Experts median agreement: strongly agree % of experts agree or strongly agree: 97.4 %  
Median usefulness rating: useful % of experts rating items useful or very useful: 94.9 %

35  
UP

**Rational** Prevention of thromboembolic events.

**Recommendations** \*Molecules with the indication:  
In case of hospitalisation for acute medical affection: fondaparinux, heparins with a low molecular weight (dalteparin, enoxaparin), non-fractionated heparin subcutaneously. The duration of the thromboprophylaxis should not exceed the patient's immobilisation period or the hospitalisation duration in the event of hospitalisation for acute medical affection.  
In case of hospitalisation for major orthopaedic surgery: fondaparinux, heparins with a low molecular weight (dalteparin, enoxaparin, tinzaparin), subcutaneous non-fractionated heparin, apixaban, dabigatran, or rivaroxaban (for total hip or knee prosthesis), anti-vitamin K, aspirin or intermittent pneumatic compression device for at least 10 to 14 days.  
In case of hospitalisation for non-orthopaedic surgery: adapt the treatment based on the thrombosis risk factors and the type of surgery.  
It is not recommended to introduce thromboprophylactic treatment in patients with a low risk of thrombosis, hospitalised for acute medical affection or for a non-orthopaedic surgical procedure.

**Remark** \*\*Non-exhaustive list of acute medical affections and increased thrombosis risks: cardiac or acute respiratory decompensation, severe infection, acute inflammatory rheumatological



|                      |                                               |                                                                                                                                                                                                                                                                                                                                                                                                                                                                                                                                                                                                                                                                                                                                                                                                                                                                                                                                                                                       |                                                                                                         |
|----------------------|-----------------------------------------------|---------------------------------------------------------------------------------------------------------------------------------------------------------------------------------------------------------------------------------------------------------------------------------------------------------------------------------------------------------------------------------------------------------------------------------------------------------------------------------------------------------------------------------------------------------------------------------------------------------------------------------------------------------------------------------------------------------------------------------------------------------------------------------------------------------------------------------------------------------------------------------------------------------------------------------------------------------------------------------------|---------------------------------------------------------------------------------------------------------|
|                      | <b>Strength of recommendation</b>             | Experts median agreement: strongly agree<br>Median usefulness rating: useful                                                                                                                                                                                                                                                                                                                                                                                                                                                                                                                                                                                                                                                                                                                                                                                                                                                                                                          | % of experts agree or strongly agree: 97.4 %<br>% of experts rating items useful or very useful: 92.3 % |
| 41<br>OP             | <b>Rational</b>                               | Hides the symptoms without treating the inflammation. Risk of respiratory arrest.                                                                                                                                                                                                                                                                                                                                                                                                                                                                                                                                                                                                                                                                                                                                                                                                                                                                                                     |                                                                                                         |
|                      | <b>Recommendation</b>                         | Prescribe a first line inhaled corticosteroids and optionally combine it with a long-acting $\beta$ 2-mimetic.                                                                                                                                                                                                                                                                                                                                                                                                                                                                                                                                                                                                                                                                                                                                                                                                                                                                        |                                                                                                         |
|                      | <b>References</b>                             | NHLBI/NIH 2007: Guidelines for the Diagnosis and Management of Asthma:<br><a href="http://www.nhlbi.nih.gov/guidelines/asthma/asthsumm.pdf">http://www.nhlbi.nih.gov/guidelines/asthma/asthsumm.pdf</a><br>GINA 2012: Global Strategy for Asthma Management and Prevention:<br><a href="http://www.ginasthma.org/local/uploads/files/GINA_Report_March13.pdf">http://www.ginasthma.org/local/uploads/files/GINA_Report_March13.pdf</a>                                                                                                                                                                                                                                                                                                                                                                                                                                                                                                                                                |                                                                                                         |
|                      | <b>Strength of recommendation</b>             | Experts median agreement: agree<br>Median usefulness rating: useful                                                                                                                                                                                                                                                                                                                                                                                                                                                                                                                                                                                                                                                                                                                                                                                                                                                                                                                   | % of experts agree or strongly agree: 97.4 %<br>% of experts rating items useful or very useful: 87.4 % |
| 42<br>UP             | <b>Rational</b>                               | This combination allows improved pulmonary function and symptoms and reduces needs for a short-acting $\beta$ 2-mimetic.                                                                                                                                                                                                                                                                                                                                                                                                                                                                                                                                                                                                                                                                                                                                                                                                                                                              |                                                                                                         |
|                      | <b>References</b>                             | NHLBI/NIH 2007: Guidelines for the Diagnosis and Management of Asthma:<br><a href="http://www.nhlbi.nih.gov/guidelines/asthma/asthsumm.pdf">http://www.nhlbi.nih.gov/guidelines/asthma/asthsumm.pdf</a><br>GINA 2012: Global Strategy for Asthma Management and Prevention:<br><a href="http://www.ginasthma.org/local/uploads/files/GINA_Report_March13.pdf">http://www.ginasthma.org/local/uploads/files/GINA_Report_March13.pdf</a>                                                                                                                                                                                                                                                                                                                                                                                                                                                                                                                                                |                                                                                                         |
|                      | <b>Strength of recommendation</b>             | Experts median agreement: strongly agree<br>Median usefulness rating: useful                                                                                                                                                                                                                                                                                                                                                                                                                                                                                                                                                                                                                                                                                                                                                                                                                                                                                                          | % of experts agree or strongly agree: 97.4 %<br>% of experts rating items useful or very useful: 92.3 % |
|                      | <b>CHRONIC OBSTRUCTIVE PULMONARY DISORDER</b> |                                                                                                                                                                                                                                                                                                                                                                                                                                                                                                                                                                                                                                                                                                                                                                                                                                                                                                                                                                                       |                                                                                                         |
| 43<br>UP             | <b>Rational</b>                               | Prevention or reduction of the symptoms of COPD.                                                                                                                                                                                                                                                                                                                                                                                                                                                                                                                                                                                                                                                                                                                                                                                                                                                                                                                                      |                                                                                                         |
|                      | <b>Recommendations</b>                        | The choice of a short- or long-acting $\beta$ 2-mimetic or anticholinergic +/- combined with each other or with an inhaled corticosteroid is made based on the stage of the COPD.<br>It is possible to combine them.                                                                                                                                                                                                                                                                                                                                                                                                                                                                                                                                                                                                                                                                                                                                                                  |                                                                                                         |
|                      | <b>Reference</b>                              | GOLD 2013: diagnosis, management and prevention of COPD:<br><a href="http://www.goldcopd.org/uploads/users/files/GOLD_Report_2013_Feb20.pdf">http://www.goldcopd.org/uploads/users/files/GOLD_Report_2013_Feb20.pdf</a>                                                                                                                                                                                                                                                                                                                                                                                                                                                                                                                                                                                                                                                                                                                                                               |                                                                                                         |
|                      | <b>Strength of recommendation</b>             | Experts median agreement: strongly agree<br>Median usefulness rating: useful                                                                                                                                                                                                                                                                                                                                                                                                                                                                                                                                                                                                                                                                                                                                                                                                                                                                                                          | % of experts agree or strongly agree: 92.3 %<br>% of experts rating items useful or very useful: 87.2 % |
| 44<br>OP             | <b>Rational</b>                               | The first-line treatment for COPD is based on inhaled bronchodilators ( $\beta$ 2-mimetic or anticholinergic). Inhaled corticosteroids are only used in the event of severe COPD with exacerbation, combined with bronchodilators.<br>Increased risk of pneumonia in COPD patients receiving inhaled corticosteroids.                                                                                                                                                                                                                                                                                                                                                                                                                                                                                                                                                                                                                                                                 |                                                                                                         |
|                      | <b>Remark</b>                                 | Inhaled corticosteroids are recommended for GOLD 3-4 stage patients (patient category C-D).                                                                                                                                                                                                                                                                                                                                                                                                                                                                                                                                                                                                                                                                                                                                                                                                                                                                                           |                                                                                                         |
|                      | <b>Reference</b>                              | GOLD 2013: diagnosis, management and prevention of COPD:<br><a href="http://www.goldcopd.org/uploads/users/files/GOLD_Report_2013_Feb20.pdf">http://www.goldcopd.org/uploads/users/files/GOLD_Report_2013_Feb20.pdf</a>                                                                                                                                                                                                                                                                                                                                                                                                                                                                                                                                                                                                                                                                                                                                                               |                                                                                                         |
|                      | <b>Strength of recommendation</b>             | Experts median agreement: strongly agree<br>Median usefulness rating: useful                                                                                                                                                                                                                                                                                                                                                                                                                                                                                                                                                                                                                                                                                                                                                                                                                                                                                                          | % of experts agree or strongly agree: 97.4 %<br>% of experts rating items useful or very useful: 97.4 % |
| <b>NEPHROLOGY</b>    |                                               |                                                                                                                                                                                                                                                                                                                                                                                                                                                                                                                                                                                                                                                                                                                                                                                                                                                                                                                                                                                       |                                                                                                         |
| <b>RENAL FAILURE</b> |                                               |                                                                                                                                                                                                                                                                                                                                                                                                                                                                                                                                                                                                                                                                                                                                                                                                                                                                                                                                                                                       |                                                                                                         |
| 45<br>Other          | <b>Rational</b>                               | Risk of overdose and toxicity.                                                                                                                                                                                                                                                                                                                                                                                                                                                                                                                                                                                                                                                                                                                                                                                                                                                                                                                                                        |                                                                                                         |
|                      | <b>Recommendation</b>                         | See a nephrologist, pharmacist or pharmacologist, or follow the adaptation suggested in the product evaluation report, the data from the literature, etc.                                                                                                                                                                                                                                                                                                                                                                                                                                                                                                                                                                                                                                                                                                                                                                                                                             |                                                                                                         |
|                      | <b>Remark</b>                                 | * <u>Non-exhaustive list of drugs requiring an adaptation or a monitoring in case of moderate to severe renal failure</u> : acarbose, allopurinol, tranexamic acid, aminoglycosides, antalgics (ex: opiates derivatives, paracetamol/acetaminophen), antialdosterones, certain antibiotics (ex: aminoglycosides, amoxicillin, cephalosporins, quinolones, trimethoprim, vancomycin), anti-calcineurins, certain anti-epileptics (ex: primidone, vigabatrin), some H1-antihistamines (ex: ebastine, fexofenadine), H2-antihistamines, some antivirals (ex: aciclovir, famciclovir, ganciclovir, tenofovir, valaciclovir), hydrophilic $\beta$ -blockers (ex: atenolol, nadolol, sotalol), colchicine, digoxin, diuretics, fibrates, direct renin inhibitors, ACEI/ARB (especially in case of severe renal failure), insulin and insulin analogues, lithium, metformin, nitrofurantoin, paroxetine, some statins (ex: simvastatin, rosuvastatin), long-acting hypoglycaemic sulfamides. |                                                                                                         |
|                      | <b>Useful link</b>                            | *SiteGPR: optimizing the proper use of medicines: <a href="http://www.sitegpr.com/index.php?lang=en">http://www.sitegpr.com/index.php?lang=en</a>                                                                                                                                                                                                                                                                                                                                                                                                                                                                                                                                                                                                                                                                                                                                                                                                                                     |                                                                                                         |

|                                   |                                   |                                                                                                                                                                                                                                                                                                                                                                                                                                                                                                                                                                                                                                                                                                                                                                                                                                                                                                                                                                                                                                                                                                                    |                                                                                                                                                                                       |
|-----------------------------------|-----------------------------------|--------------------------------------------------------------------------------------------------------------------------------------------------------------------------------------------------------------------------------------------------------------------------------------------------------------------------------------------------------------------------------------------------------------------------------------------------------------------------------------------------------------------------------------------------------------------------------------------------------------------------------------------------------------------------------------------------------------------------------------------------------------------------------------------------------------------------------------------------------------------------------------------------------------------------------------------------------------------------------------------------------------------------------------------------------------------------------------------------------------------|---------------------------------------------------------------------------------------------------------------------------------------------------------------------------------------|
|                                   | <b>Reference</b>                  | KDIGO 2012: Evaluation and Management of Chronic Kidney Disease:<br><a href="http://www.kdigo.org/clinical_practice_guidelines/pdf/CKD/KDIGO_2012_CKD_GL.pdf">http://www.kdigo.org/clinical_practice_guidelines/pdf/CKD/KDIGO_2012_CKD_GL.pdf</a>                                                                                                                                                                                                                                                                                                                                                                                                                                                                                                                                                                                                                                                                                                                                                                                                                                                                  |                                                                                                                                                                                       |
|                                   | <b>Strength of recommendation</b> | Experts median agreement: strongly agree<br>Median usefulness rating: very useful                                                                                                                                                                                                                                                                                                                                                                                                                                                                                                                                                                                                                                                                                                                                                                                                                                                                                                                                                                                                                                  | % of experts agree or strongly agree: 97.4 %<br>% of experts rating items useful or very useful: 97.4 %                                                                               |
| 46<br>OP                          | <b>Rational</b>                   | Risk of renal failure exacerbation or of treatment side effect.                                                                                                                                                                                                                                                                                                                                                                                                                                                                                                                                                                                                                                                                                                                                                                                                                                                                                                                                                                                                                                                    |                                                                                                                                                                                       |
|                                   | <b>Recommendations</b>            | Favour a therapeutic alternative when available or adjust doses, monitor renal function closely and propose therapeutic drug concentration monitoring if needed.<br>If there is a change in the renal parameters, stop taking the medication if possible.                                                                                                                                                                                                                                                                                                                                                                                                                                                                                                                                                                                                                                                                                                                                                                                                                                                          |                                                                                                                                                                                       |
|                                   | <b>Remark</b>                     | * <u>Non-exhaustive list of nephrotoxic drugs</u> : NSAIDs, allopurinol, amphotericin B, certain antibiotics (aminoglycosides, cephalosporins, penicillins, quinolones, sulfamides, vancomycin), certain antivirals (aciclovir, ganciclovir, foscarnet), anti-aldosterones, anti-calcineurins, diuretics, direct renin inhibitors, lithium, methotrexate.                                                                                                                                                                                                                                                                                                                                                                                                                                                                                                                                                                                                                                                                                                                                                          |                                                                                                                                                                                       |
|                                   | <b>References</b>                 | KDIGO 2012: Evaluation and Management of Chronic Kidney Disease:<br><a href="http://www.kdigo.org/clinical_practice_guidelines/pdf/CKD/KDIGO_2012_CKD_GL.pdf">http://www.kdigo.org/clinical_practice_guidelines/pdf/CKD/KDIGO_2012_CKD_GL.pdf</a><br>Lord A, et al. La néphrotoxicité médicamenteuse. Le Médecin du Québec, 2002 :<br><a href="http://www.fmoq.org/Lists/FMOQDocumentLibrary/fr/Le%20M%C3%A9decin%20du%20Qu%C3%A9bec/Arcives/2000%20-%202009/055-059Lord-II0602.pdf">http://www.fmoq.org/Lists/FMOQDocumentLibrary/fr/Le%20M%C3%A9decin%20du%20Qu%C3%A9bec/Arcives/2000%20-%202009/055-059Lord-II0602.pdf</a><br>Fored M, et al. Acetaminophen, aspirin and chronic renal failure. NEJM 2001:<br><a href="http://www.nejm.org/doi/pdf/10.1056/NEJMoa010323">http://www.nejm.org/doi/pdf/10.1056/NEJMoa010323</a><br>Perneger TV, et al. Risk of kidney disease associated with the use of acetaminophen, aspirin and nonsteroidal antiinflammatory drugs. NEJM 1994: <a href="http://www.nejm.org/doi/pdf/10.1056/NEJM199412223312502">http://www.nejm.org/doi/pdf/10.1056/NEJM199412223312502</a> |                                                                                                                                                                                       |
|                                   | <b>Strength of recommendation</b> | Experts median agreement: strongly agree<br>Median usefulness rating: very useful                                                                                                                                                                                                                                                                                                                                                                                                                                                                                                                                                                                                                                                                                                                                                                                                                                                                                                                                                                                                                                  | % of experts agree or strongly agree: 92.3 %<br>% of experts rating items useful or very useful: 89.7 %                                                                               |
| 47<br>UP                          | <b>Rational</b>                   | Erythropoiesis stimulation causes increased iron needs.                                                                                                                                                                                                                                                                                                                                                                                                                                                                                                                                                                                                                                                                                                                                                                                                                                                                                                                                                                                                                                                            |                                                                                                                                                                                       |
|                                   | <b>Recommendations</b>            | * <u>Sufficient iron supplement</u> = making it possible to maintain a ferritin level between 100 and 500 ng/ml and a transferrin saturation between 20 and 30%.<br>Intravenous supplements will be favoured, particularly in patients receiving haemodialysis.                                                                                                                                                                                                                                                                                                                                                                                                                                                                                                                                                                                                                                                                                                                                                                                                                                                    |                                                                                                                                                                                       |
|                                   | <b>Remark</b>                     | In case of IV supplement, patients should be carefully monitored so as to detect any side effects and any signs or symptoms of hypersensitivity reactions during and after each administration (monitoring for at least 30 minutes). It is only administered when personnel trained to assess and provide care for anaphylactic reactions are immediately available, in an environment having the necessary means to provide resuscitation.                                                                                                                                                                                                                                                                                                                                                                                                                                                                                                                                                                                                                                                                        |                                                                                                                                                                                       |
|                                   | <b>Reference</b>                  | KDIGO 2012: Evaluation and Management of Chronic Kidney Disease:<br><a href="http://www.kdigo.org/clinical_practice_guidelines/pdf/CKD/KDIGO_2012_CKD_GL.pdf">http://www.kdigo.org/clinical_practice_guidelines/pdf/CKD/KDIGO_2012_CKD_GL.pdf</a>                                                                                                                                                                                                                                                                                                                                                                                                                                                                                                                                                                                                                                                                                                                                                                                                                                                                  |                                                                                                                                                                                       |
|                                   | <b>Strength of recommendation</b> | Experts median agreement: strongly agree<br>Median usefulness rating: very useful                                                                                                                                                                                                                                                                                                                                                                                                                                                                                                                                                                                                                                                                                                                                                                                                                                                                                                                                                                                                                                  | % of experts agree or strongly agree: 94.9 %<br>% of experts rating items useful or very useful: 97.4 %                                                                               |
| 48<br>UP                          | <b>Rational</b>                   | In CKD subjects, untreated anaemia may cause cardiac, cognitive and mental deterioration and debilitating symptoms.<br>Little benefit and increased risk of thrombosis, vascular issues and death for Hb levels > 13 g/dl.                                                                                                                                                                                                                                                                                                                                                                                                                                                                                                                                                                                                                                                                                                                                                                                                                                                                                         |                                                                                                                                                                                       |
|                                   | <b>Recommendations</b>            | <u>Initial dosing regimen suggested</u> : 50 to 100 IU/kg/week.<br>The target Hb level should generally be comprised between 11 and 12.                                                                                                                                                                                                                                                                                                                                                                                                                                                                                                                                                                                                                                                                                                                                                                                                                                                                                                                                                                            |                                                                                                                                                                                       |
|                                   | <b>References</b>                 | KDIGO 2012: Evaluation and Management of Chronic Kidney Disease:<br><a href="http://www.kdigo.org/clinical_practice_guidelines/pdf/CKD/KDIGO_2012_CKD_GL.pdf">http://www.kdigo.org/clinical_practice_guidelines/pdf/CKD/KDIGO_2012_CKD_GL.pdf</a><br>KDOQI 2007: Recommendations for anemia in chronic kidney disease. Update of hemoglobin target:<br><a href="http://www.therenalnetwork.org/qi/resources/KDOQIANemiaCKD2007Update.pdf">http://www.therenalnetwork.org/qi/resources/KDOQIANemiaCKD2007Update.pdf</a>                                                                                                                                                                                                                                                                                                                                                                                                                                                                                                                                                                                             |                                                                                                                                                                                       |
|                                   | <b>Strength of recommendation</b> | Experts median agreement: strongly agree<br>Median usefulness rating: useful                                                                                                                                                                                                                                                                                                                                                                                                                                                                                                                                                                                                                                                                                                                                                                                                                                                                                                                                                                                                                                       | % of experts agree or strongly agree: 94.9 %<br>% of experts rating items useful or very useful: 87.2 %                                                                               |
|                                   | 49<br>UP                          | <b>Rational</b>                                                                                                                                                                                                                                                                                                                                                                                                                                                                                                                                                                                                                                                                                                                                                                                                                                                                                                                                                                                                                                                                                                    | Prevention of calcium and phosphates disorders and of renal osteodystrophy disorders in CKD.<br>Phosphate-binding agents bind the dietary phosphate contained in the digestive tract. |
| <b>Remark</b>                     |                                   | A calcium and phosphates evaluation makes it possible to adapt doses.                                                                                                                                                                                                                                                                                                                                                                                                                                                                                                                                                                                                                                                                                                                                                                                                                                                                                                                                                                                                                                              |                                                                                                                                                                                       |
| <b>Reference</b>                  |                                   | KDIGO 2009: Chronic Kidney Disease–Mineral and Bone Disorder: <a href="http://www.kdigo.org/pdf/KDIGO%20CKD-MBD%20GL%20KI%20Suppl%20113.pdf">http://www.kdigo.org/pdf/KDIGO%20CKD-MBD%20GL%20KI%20Suppl%20113.pdf</a>                                                                                                                                                                                                                                                                                                                                                                                                                                                                                                                                                                                                                                                                                                                                                                                                                                                                                              |                                                                                                                                                                                       |
| <b>Strength of recommendation</b> |                                   | Experts median agreement: agree<br>Median usefulness rating: useful                                                                                                                                                                                                                                                                                                                                                                                                                                                                                                                                                                                                                                                                                                                                                                                                                                                                                                                                                                                                                                                | % of experts agree or strongly agree: 94.9 %<br>% of experts rating items useful or very useful: 89.7 %                                                                               |
| 50<br>UP                          |                                   | <b>Rational</b>                                                                                                                                                                                                                                                                                                                                                                                                                                                                                                                                                                                                                                                                                                                                                                                                                                                                                                                                                                                                                                                                                                    | ACEI and ARB have nephroprotective effects.                                                                                                                                           |

|                                                        |                                   |                                                                                                                                                                                                                                                                                                                                                                                                                                                                                                                                                                                                                                                                                                                                                                                                                                                                                                                                                                                                                         |
|--------------------------------------------------------|-----------------------------------|-------------------------------------------------------------------------------------------------------------------------------------------------------------------------------------------------------------------------------------------------------------------------------------------------------------------------------------------------------------------------------------------------------------------------------------------------------------------------------------------------------------------------------------------------------------------------------------------------------------------------------------------------------------------------------------------------------------------------------------------------------------------------------------------------------------------------------------------------------------------------------------------------------------------------------------------------------------------------------------------------------------------------|
|                                                        | <b>Remarks</b>                    | *Albuminuria: > 300 mg/24h, **microalbuminuria: 30 to 300 mg/24h.<br>The ACEI or ARB may be suspended temporarily if renal failure worsens.                                                                                                                                                                                                                                                                                                                                                                                                                                                                                                                                                                                                                                                                                                                                                                                                                                                                             |
|                                                        | <b>Reference</b>                  | KDIGO 2012: Evaluation and Management of Chronic Kidney Disease:<br><a href="http://www.kdigo.org/clinical_practice_guidelines/pdf/CKD/KDIGO_2012_CKD_GL.pdf">http://www.kdigo.org/clinical_practice_guidelines/pdf/CKD/KDIGO_2012_CKD_GL.pdf</a>                                                                                                                                                                                                                                                                                                                                                                                                                                                                                                                                                                                                                                                                                                                                                                       |
|                                                        | <b>Strength of recommendation</b> | Experts median agreement: strongly agree % of experts agree or strongly agree: 100 %<br>Median usefulness rating: very useful % of experts rating items useful or very useful: 100 %                                                                                                                                                                                                                                                                                                                                                                                                                                                                                                                                                                                                                                                                                                                                                                                                                                    |
| <b>BENIGN PROSTATIC HYPERPLASIA</b>                    |                                   |                                                                                                                                                                                                                                                                                                                                                                                                                                                                                                                                                                                                                                                                                                                                                                                                                                                                                                                                                                                                                         |
| 51<br>OP                                               | <b>Rational</b>                   | Risk of urine retention and prostate obstruction.                                                                                                                                                                                                                                                                                                                                                                                                                                                                                                                                                                                                                                                                                                                                                                                                                                                                                                                                                                       |
|                                                        | <b>Remark</b>                     | * <u>Non-exhaustive list of anticholinergic drugs</u> : tricyclic antidepressants, antihistamines, antimuscarinics, some anti-Parkinson medications, antipsychotics, antispasmodics, colchicine associated with opium and tiemonium methylsulfate, muscle relaxers.                                                                                                                                                                                                                                                                                                                                                                                                                                                                                                                                                                                                                                                                                                                                                     |
|                                                        | <b>Reference</b>                  | Mebarki S, et al. Échelles d'évaluation de l'effet anticholinergique des médicaments. NPG 2012 :<br><a href="http://gerontoprevention.free.fr/articles/Anticholinergiques.pdf">http://gerontoprevention.free.fr/articles/Anticholinergiques.pdf</a>                                                                                                                                                                                                                                                                                                                                                                                                                                                                                                                                                                                                                                                                                                                                                                     |
|                                                        | <b>Strength of recommendation</b> | Experts median agreement: agree % of experts agree or strongly agree: 100 %<br>Median usefulness rating: useful % of experts rating items useful or very useful: 92.3 %                                                                                                                                                                                                                                                                                                                                                                                                                                                                                                                                                                                                                                                                                                                                                                                                                                                 |
| <b>GASTROENTEROLOGY</b>                                |                                   |                                                                                                                                                                                                                                                                                                                                                                                                                                                                                                                                                                                                                                                                                                                                                                                                                                                                                                                                                                                                                         |
| <b>PEPTIC ULCER DISEASE and PROTON PUMP INHIBITORS</b> |                                   |                                                                                                                                                                                                                                                                                                                                                                                                                                                                                                                                                                                                                                                                                                                                                                                                                                                                                                                                                                                                                         |
| 52<br>OP                                               | <b>Rational</b>                   | Avoid long-term treatments with no indication.<br>Potential risk of pneumopathy, <i>Clostridium difficile</i> infection, malabsorption, osteoporosis, interstitial nephritis and rebound effect upon stopping PPI.                                                                                                                                                                                                                                                                                                                                                                                                                                                                                                                                                                                                                                                                                                                                                                                                      |
|                                                        | <b>Recommendations</b>            | Only a small number of indications justify long-term PPI prescription and should be subjected to a specialist opinion.<br><u>Non-exhaustive list of justified indications</u> :<br>-Ulcer associated with a factor slowing scarring (e.g.: tobacco use, large ulcer size: ≥ 10 mm, gastrotoxic drug use: primarily NSAIDs),<br>-Long-term NSAIDs use in patients with risk of digestive bleeding: > 65 years, history of gastroduodenal ulcer, combination with a antiplatelet drug: particularly low-dose aspirin or clopidogrel and/or corticoids and/or an anticoagulant (these combinations must be avoided as much as possible),<br>-Zollinger Ellison syndrome,<br>-Gastroesophageal reflux with frequent or early relapse upon stopping PPI,<br>-Severe oesophagitis, peptic stenosis, symptomatic Barrett's oesophagus or Barrett's oesophagus associated with oesophagitis.<br>In the other indications, gradually stopping the PPI may be suggested in order to avoid rebound acidity in case of abrupt stop. |
|                                                        | <b>References</b>                 | FDA Drug Safety Communication 2012: Clostridium difficile-associated diarrhea can be associated with stomach acid drugs known as proton pump inhibitors (PPIs): <a href="http://www.fda.gov/Drugs/DrugSafety/ucm290510.htm">http://www.fda.gov/Drugs/DrugSafety/ucm290510.htm</a><br>HAS 2009 : Médicaments inhibiteurs de la pompe à protons chez l'adulte : réévaluation : <a href="http://www.has-sante.fr/portail/upload/docs/application/pdf/2009-04/argumentaire_ipp_2009-04-27_14-15-18_458.pdf">http://www.has-sante.fr/portail/upload/docs/application/pdf/2009-04/argumentaire_ipp_2009-04-27_14-15-18_458.pdf</a>                                                                                                                                                                                                                                                                                                                                                                                            |
|                                                        | <b>Strength of recommendation</b> | Experts median agreement: strongly agree % of experts agree or strongly agree: 94.9 %<br>Median usefulness rating: very useful % of experts rating items useful or very useful: 97.4 %                                                                                                                                                                                                                                                                                                                                                                                                                                                                                                                                                                                                                                                                                                                                                                                                                                  |
| 53<br>OP                                               | <b>Rational</b>                   | Avoid long-term treatments with no indication.<br>Potential risk of pneumopathy, <i>Clostridium difficile</i> infection, osteoporosis and rebound effect upon stopping PPIs.                                                                                                                                                                                                                                                                                                                                                                                                                                                                                                                                                                                                                                                                                                                                                                                                                                            |
|                                                        | <b>Recommendation</b>             | Gradual stopping of PPIs may be suggested in order to avoid rebound acidity in case of abrupt stop, if the treatment has been extended.                                                                                                                                                                                                                                                                                                                                                                                                                                                                                                                                                                                                                                                                                                                                                                                                                                                                                 |
|                                                        | <b>Reference</b>                  | HAS 2009 : Médicaments inhibiteurs de la pompe à protons chez l'adulte : réévaluation : <a href="http://www.has-sante.fr/portail/upload/docs/application/pdf/2009-04/argumentaire_ipp_2009-04-27_14-15-18_458.pdf">http://www.has-sante.fr/portail/upload/docs/application/pdf/2009-04/argumentaire_ipp_2009-04-27_14-15-18_458.pdf</a>                                                                                                                                                                                                                                                                                                                                                                                                                                                                                                                                                                                                                                                                                 |
|                                                        | <b>Strength of recommendation</b> | Experts median agreement: strongly agree % of experts agree or strongly agree: 100 %<br>Median usefulness rating: very useful % of experts rating items useful or very useful: 97.4 %                                                                                                                                                                                                                                                                                                                                                                                                                                                                                                                                                                                                                                                                                                                                                                                                                                   |
| 54<br>OP                                               | <b>Rational</b>                   | <u>Half-doses of PPI are recommended*</u> :<br>in the prevention of gastroduodenal ulcers in at-risk patients,<br>in case of gastroesophageal reflux without oesophagitis.<br>Avoid long-term treatments with no indication.<br>Potential risk of pneumopathy, infection with <i>Clostridium difficile</i> , osteoporosis and rebound effect upon stopping PPIs                                                                                                                                                                                                                                                                                                                                                                                                                                                                                                                                                                                                                                                         |
|                                                        | <b>Recommendations</b>            | * <u>Suggested dosing regimen</u> :<br>Half-dose for gastroesophageal reflux without oesophagitis and prevention of lesions caused                                                                                                                                                                                                                                                                                                                                                                                                                                                                                                                                                                                                                                                                                                                                                                                                                                                                                      |

by NSAIDs in at-risk patients: omeprazole: 10 or 20 mg QD, lansoprazole: 15 mg QD, pantoprazole: 20 mg QD, rabeprazole: 10 mg QD, esomeprazole: 20 mg QD.  
Full dose for gastroesophageal reflux with oesophagitis.  
In the prevention of stress ulcers in intensive care, follow local recommendations.  
Re-evaluate treatment if it was started before hospitalisation.

**References** Katz P, et al. Guidelines for the Diagnosis and Management of Gastroesophageal Reflux Disease. Am J Gastroenterol 2013: [http://d2j7fjepcxuj0a.cloudfront.net/wp-content/uploads/2013/10/ACG\\_Guideline\\_GERD\\_March\\_2013\\_plus\\_corrigendum.pdf](http://d2j7fjepcxuj0a.cloudfront.net/wp-content/uploads/2013/10/ACG_Guideline_GERD_March_2013_plus_corrigendum.pdf)  
ASGE 2010: The role of endoscopy in the management of patients with peptic ulcer disease: [http://www.asge.org/uploadedFiles/Publications\\_and\\_Products/Practice\\_Guidelines/The%20role%20of%20endoscopy%20in%20the%20management%20of%20patientswith%20peptic%20ulcer%20disease.pdf](http://www.asge.org/uploadedFiles/Publications_and_Products/Practice_Guidelines/The%20role%20of%20endoscopy%20in%20the%20management%20of%20patientswith%20peptic%20ulcer%20disease.pdf)  
HAS 2009 : Médicaments inhibiteurs de la pompe à protons chez l'adulte : réévaluation : [http://www.has-sante.fr/portail/upload/docs/application/pdf/2009-04/argumentaire\\_ipp\\_2009-04-27\\_14-15-18\\_458.pdf](http://www.has-sante.fr/portail/upload/docs/application/pdf/2009-04/argumentaire_ipp_2009-04-27_14-15-18_458.pdf)  
HAS 2009 : Les inhibiteurs de la pompe à protons chez l'adulte : [http://www.has-sante.fr/portail/upload/docs/application/pdf/2009-06/ipp\\_adulte\\_juin\\_2009.pdf](http://www.has-sante.fr/portail/upload/docs/application/pdf/2009-06/ipp_adulte_juin_2009.pdf)  
Summary of products characteristics

**Strength of recommendation** Experts median agreement: strongly agree % of experts agree or strongly agree: 94.9 %  
Median usefulness rating: very useful % of experts rating items useful or very useful: 92.3 %

**Rational** Treatment with no valid indication.  
Potential risk of pneumopathy, infection with *Clostridium difficile*, osteoporosis and rebound effect upon stopping PPIs

**Recommendation** Only a small number of indications\*\* justify long-term PPI prescription and should be subjected to a specialist opinion.  
Gradual stopping of PPIs may be suggested in order to avoid rebound acidity in case of abrupt stop, if the treatment has been extended.

**Remark** \*List of risk factors: age > 65 years, concomitant use of NSAIDs, concomitant use of corticoids and/or anticoagulants, cardiovascular disease, long-term NSAIDs use, history of digestive ulcer.  
\*\*Non-exhaustive list of justified indications:  
-Ulcer associated with a factor slowing scarring (e.g.: tobacco use, large ulcer size: ≥ 10 mm, gastrotoxic drug use: primarily NSAIDs),  
-Long-term NSAIDs use in patients with risk of digestive bleeding: > 65 years, history of gastroduodenal ulcer, combination with a antiplatelet drug: particularly low-dose aspirin or clopidogrel and/or corticoids and/or an anticoagulant (these combinations must be avoided as much as possible),  
-Zollinger Ellison syndrome,  
-Gastroesophageal reflux with frequent or early relapse upon stopping PPI,  
-Severe oesophagitis, peptic stenosis, symptomatic Barrett's oesophagus or Barrett's oesophagus associated with oesophagitis.  
In the other indications, gradually stopping the PPI may be suggested in order to avoid rebound acidity in case of abrupt stop.  
\*\*\*Calculation of the HAS-BLED score: HBP (sBP > 160 mmHg) (1pt), Abnormal renal function (serum creatinine ≥ 200 µmol/L) or/and Abnormal liver function (Cirrhosis, bilirubin > 2x UNL with AST/ALT/AP > 3x UNL) (1 or 2 pts), Stroke history (1pt), Bleeding (Bleeding history or predisposition (anemia)) (1pt), Labile INR (Therapeutic time in range < 60%) (1pt), Elderly (Greater than 65 years old) (1pt), Drugs or alcohol (Drugs - other antiplatelet agents or NSAIDs, Alcohol - more than 8 drinks per week) (1 or 2 pts).

**References** HAS 2009 : Les inhibiteurs de la pompe à protons chez l'adulte : [http://www.has-sante.fr/portail/upload/docs/application/pdf/2009-06/ipp\\_adulte\\_juin\\_2009.pdf](http://www.has-sante.fr/portail/upload/docs/application/pdf/2009-06/ipp_adulte_juin_2009.pdf)  
ACCF/ACG/AHA 2008: Expert Consensus Document on Reducing the Gastrointestinal Risks of Antiplatelet Therapy and NSAID Use: <http://circ.ahajournals.org/content/118/18/1894.full.pdf>  
Lanza FL, et al. Practice Parameters Committee of the American College of Gastroenterology. Guidelines for prevention of NSAID-related ulcer complications. Am J Gastroenterol.2009: <http://www.guideline.gov/content.aspx?id=38322>

**Strength of recommendation** Experts median agreement: agree % of experts agree or strongly agree: 89.7 %  
Median usefulness rating: useful % of experts rating items useful or very useful: 89.7 %

**Rational** Risk of digestive haemorrhage.

**Recommendation** If NSAIDs use is necessary, it must be combined with a PPI.

**Remark** \*Non-exhaustive list of drugs with bleeding risk (alone or in combination): NSAIDs, including low-dose aspirin (except COX2-inhibitor), anticoagulants, antiplatelet drugs,

|                                         |                                                                                                                                                                                                   |                                                                                                                                                                                                                                                                                                                                                                                                                                                                                                                                                                                                                                                                                                                                                                                                                                                                                                                                                                                                                                                                                                                                                                                                                                                                                                                                                                                                                       |
|-----------------------------------------|---------------------------------------------------------------------------------------------------------------------------------------------------------------------------------------------------|-----------------------------------------------------------------------------------------------------------------------------------------------------------------------------------------------------------------------------------------------------------------------------------------------------------------------------------------------------------------------------------------------------------------------------------------------------------------------------------------------------------------------------------------------------------------------------------------------------------------------------------------------------------------------------------------------------------------------------------------------------------------------------------------------------------------------------------------------------------------------------------------------------------------------------------------------------------------------------------------------------------------------------------------------------------------------------------------------------------------------------------------------------------------------------------------------------------------------------------------------------------------------------------------------------------------------------------------------------------------------------------------------------------------------|
|                                         |                                                                                                                                                                                                   | corticosteroids, antidepressants: SSRIs.                                                                                                                                                                                                                                                                                                                                                                                                                                                                                                                                                                                                                                                                                                                                                                                                                                                                                                                                                                                                                                                                                                                                                                                                                                                                                                                                                                              |
|                                         | <b>References</b>                                                                                                                                                                                 | <p>Abraham N, et al. Risk of Lower and Upper Gastrointestinal Bleeding, Transfusions, and Hospitalizations With Complex Antithrombotic Therapy in Elderly Patients. <i>Circulation</i> 2013:<br/> <a href="http://circ.ahajournals.org/content/early/2013/09/11/CIRCULATIONAHA.113.004747.full.pdf">http://circ.ahajournals.org/content/early/2013/09/11/CIRCULATIONAHA.113.004747.full.pdf</a></p> <p>Laine L, et al. Management of Patients With Ulcer Bleeding. <i>Am J Gastroenterol</i> 2012:<br/> <a href="http://s3.gi.org/physicians/guidelines/UlcerBleeding.pdf">http://s3.gi.org/physicians/guidelines/UlcerBleeding.pdf</a></p> <p>Labos C, et al. Risk of bleeding associated with combined use of selective serotonin reuptake inhibitors and antiplatelet therapy following acute myocardial infarction. <i>CMAJ</i> 2011:<br/> <a href="http://www.ncbi.nlm.nih.gov/pmc/articles/PMC3216455/pdf/1831835.pdf">http://www.ncbi.nlm.nih.gov/pmc/articles/PMC3216455/pdf/1831835.pdf</a></p> <p>Rostom A, et al. Prevention of NSAID-induced gastroduodenal ulcers (reviews). <i>Cochrane Database Syst Rev</i> 2002 [abstract]:<br/> <a href="http://onlinelibrary.wiley.com/doi/10.1002/14651858.CD002296/abstract;jsessionid=0A42A6B840ACAF01DE2C6BAC3B59613C.f01t01">http://onlinelibrary.wiley.com/doi/10.1002/14651858.CD002296/abstract;jsessionid=0A42A6B840ACAF01DE2C6BAC3B59613C.f01t01</a></p> |
|                                         | <b>Strength of recommendation</b>                                                                                                                                                                 | <p>Experts median agreement: agree % of experts agree or strongly agree: 92.3 %</p> <p>Median usefulness rating: useful % of experts rating items useful or very useful: 79.5 %</p>                                                                                                                                                                                                                                                                                                                                                                                                                                                                                                                                                                                                                                                                                                                                                                                                                                                                                                                                                                                                                                                                                                                                                                                                                                   |
| <b>HEPATIC IMPAIRMENT and CIRRHOSIS</b> |                                                                                                                                                                                                   |                                                                                                                                                                                                                                                                                                                                                                                                                                                                                                                                                                                                                                                                                                                                                                                                                                                                                                                                                                                                                                                                                                                                                                                                                                                                                                                                                                                                                       |
| 57<br>OP                                | <b>Rational</b>                                                                                                                                                                                   | Avoid over-added hepatic toxicities.<br>Avoid toxicities induced by a change in the pharmacokinetics of drugs eliminated by the liver*.                                                                                                                                                                                                                                                                                                                                                                                                                                                                                                                                                                                                                                                                                                                                                                                                                                                                                                                                                                                                                                                                                                                                                                                                                                                                               |
|                                         | <b>Recommendation</b>                                                                                                                                                                             | See a hepatologist, pharmacist or pharmacologist, or follow the adaptation proposed in the Summary of products characteristics and the data from the literature.                                                                                                                                                                                                                                                                                                                                                                                                                                                                                                                                                                                                                                                                                                                                                                                                                                                                                                                                                                                                                                                                                                                                                                                                                                                      |
|                                         | <b>Remarks</b>                                                                                                                                                                                    | <p>*Non-exhaustive list of drugs to be adapted in patients with hepatic insufficiency: NSAIDs, Tricyclic antidepressants, VKA, antiretrovirals, barbiturates, BZD (favour oxazepam or lorazepam), carbamates, clindamycin, flecainide, ACEI, isoniazid, lincomycin, metronidazole, morphinics, pefloxacin, pyrazinamide, rifampicin, sulfamides, tetracyclines.</p> <p><u>Avoid prescribing NSAIDs:</u> drugs with a high risk of digestive bleeding and hepatorenal syndrome.</p> <p><u>Exercise caution when prescribing psychotropics, hypnotics, analgics and opiates to patients with cirrhosis (in particular decompensated):</u> high risk of recurrence/worsening of hepatic encephalopathy. Favour glucuro-conjugated psychotropic drugs, start psychotropic drugs and opiates at the minimum effective dose.</p> <p><u>Suggested dosing regimen for paracetamol/acetaminophen:</u> 2 g/day (4 g/day may cause silent transaminase elevations).</p>                                                                                                                                                                                                                                                                                                                                                                                                                                                          |
|                                         | <b>Useful link</b>                                                                                                                                                                                | <p>Livertox: <a href="http://livertox.nih.gov/">http://livertox.nih.gov/</a></p> <p>Hepatoweb : <a href="http://hepatoweb.com/">http://hepatoweb.com/</a></p> <p>MELD score: <a href="http://www.mayoclinic.org/medical-professionals/model-end-stage-liver-disease/meld-model">http://www.mayoclinic.org/medical-professionals/model-end-stage-liver-disease/meld-model</a></p>                                                                                                                                                                                                                                                                                                                                                                                                                                                                                                                                                                                                                                                                                                                                                                                                                                                                                                                                                                                                                                      |
|                                         | <b>References</b>                                                                                                                                                                                 | <p>Lewis JH, et al. Review articles: prescribing medications in patients with cirrhosis – a practical guide. <i>Aliment Pharmacol Ther</i> 2013 [abstract]: <a href="http://www.ncbi.nlm.nih.gov/pubmed/?term=23638982">http://www.ncbi.nlm.nih.gov/pubmed/?term=23638982</a></p> <p>Chandok N, et al. Pain Management in the Cirrhotic Patient: The Clinical Challenge. <i>Mayo Clin Proc.</i> 2010:<br/> <a href="http://www.ncbi.nlm.nih.gov/pmc/articles/PMC2861975/pdf/mayoclinproc_85_5_008.pdf">http://www.ncbi.nlm.nih.gov/pmc/articles/PMC2861975/pdf/mayoclinproc_85_5_008.pdf</a></p>                                                                                                                                                                                                                                                                                                                                                                                                                                                                                                                                                                                                                                                                                                                                                                                                                      |
|                                         | <b>Strength of recommendation</b>                                                                                                                                                                 | <p>Experts median agreement: strongly agree % of experts agree or strongly agree: 94.9 %</p> <p>Median usefulness rating: very useful % of experts rating items useful or very useful: 94.9 %</p>                                                                                                                                                                                                                                                                                                                                                                                                                                                                                                                                                                                                                                                                                                                                                                                                                                                                                                                                                                                                                                                                                                                                                                                                                     |
| 58<br>UP                                | <b>Rational</b>                                                                                                                                                                                   | Allow to reduce the absorption of nitrates released by the metabolism of the proteins.                                                                                                                                                                                                                                                                                                                                                                                                                                                                                                                                                                                                                                                                                                                                                                                                                                                                                                                                                                                                                                                                                                                                                                                                                                                                                                                                |
|                                         | <b>Remarks</b>                                                                                                                                                                                    | <u>Dosing regimens allowing to obtain 2 to 4 soft stools/day:</u> lactulose: 20 to 30 g orally 2 to 4 times/day, lactitol: 10 g orally 4 times/day. If oral administration is not possible, administration in enema form is one alternative (6 to 20 packets diluted in water, depending on the type of probe used).                                                                                                                                                                                                                                                                                                                                                                                                                                                                                                                                                                                                                                                                                                                                                                                                                                                                                                                                                                                                                                                                                                  |
|                                         | <b>References</b>                                                                                                                                                                                 | <p>Sharma P, et al. Disaccharides in the treatment of hepatic encephalopathy. <i>Metab Brain Dis</i> 2013 [abstract]:<br/> <a href="http://link.springer.com/article/10.1007%2Fs11011-013-9392-4">http://link.springer.com/article/10.1007%2Fs11011-013-9392-4</a></p> <p>Als-Nielsen B, et al. Nonabsorbable disaccharides for hepatic encephalopathy. <i>BMJ</i> 2004:<br/> <a href="http://www.ncbi.nlm.nih.gov/pmc/articles/PMC403844/pdf/bmj32801046.pdf">http://www.ncbi.nlm.nih.gov/pmc/articles/PMC403844/pdf/bmj32801046.pdf</a></p>                                                                                                                                                                                                                                                                                                                                                                                                                                                                                                                                                                                                                                                                                                                                                                                                                                                                         |
| <b>Strength of recommendation</b>       | <p>Experts median agreement: strongly agree % of experts agree or strongly agree: 94.9 %</p> <p>Median usefulness rating: very useful % of experts rating items useful or very useful: 97.2 %</p> |                                                                                                                                                                                                                                                                                                                                                                                                                                                                                                                                                                                                                                                                                                                                                                                                                                                                                                                                                                                                                                                                                                                                                                                                                                                                                                                                                                                                                       |
| <b>DIARRHOEA</b>                        |                                                                                                                                                                                                   |                                                                                                                                                                                                                                                                                                                                                                                                                                                                                                                                                                                                                                                                                                                                                                                                                                                                                                                                                                                                                                                                                                                                                                                                                                                                                                                                                                                                                       |
| 59<br>OP                                | <b>Rational</b>                                                                                                                                                                                   | Risk of faecal and infectious stasis (toxins, spores) that may be harmful.                                                                                                                                                                                                                                                                                                                                                                                                                                                                                                                                                                                                                                                                                                                                                                                                                                                                                                                                                                                                                                                                                                                                                                                                                                                                                                                                            |
|                                         | <b>Recommendation</b>                                                                                                                                                                             | *Transit retarders (ex: loperamide) should be reserved for short-term symptomatic treatment                                                                                                                                                                                                                                                                                                                                                                                                                                                                                                                                                                                                                                                                                                                                                                                                                                                                                                                                                                                                                                                                                                                                                                                                                                                                                                                           |

|                     |                                   |                                                                                                                                                                                                                                                                                                                                                                                                                                                                                                                                                                                                                                                                                                                                                                          |
|---------------------|-----------------------------------|--------------------------------------------------------------------------------------------------------------------------------------------------------------------------------------------------------------------------------------------------------------------------------------------------------------------------------------------------------------------------------------------------------------------------------------------------------------------------------------------------------------------------------------------------------------------------------------------------------------------------------------------------------------------------------------------------------------------------------------------------------------------------|
|                     |                                   | (2 days) of acute non-infectious diarrhoea in addition to rehydration.                                                                                                                                                                                                                                                                                                                                                                                                                                                                                                                                                                                                                                                                                                   |
|                     | <b>Strength of recommendation</b> | Experts median agreement: strongly agree % of experts agree or strongly agree: 92.3 %<br>Median usefulness rating: useful % of experts rating items useful or very useful: 84.2 %                                                                                                                                                                                                                                                                                                                                                                                                                                                                                                                                                                                        |
| 60<br>Other         | <b>Rational</b>                   | Requires quick diagnosis and monitoring of any <i>Clostridium difficile</i> infection for individual benefit and to prevent nosocomial transmission.                                                                                                                                                                                                                                                                                                                                                                                                                                                                                                                                                                                                                     |
|                     | <b>Recommendation</b>             | In case of positive diagnosis, if possible, stop the responsible antibiotic and treat the <i>Clostridium difficile</i> infection.                                                                                                                                                                                                                                                                                                                                                                                                                                                                                                                                                                                                                                        |
|                     | <b>Reference</b>                  | ESCMID 2009: Data review and recommendations for diagnosing <i>Clostridium difficile</i> -infection:<br><a href="https://www.escmid.org/fileadmin/src/media/PDFs/4ESCMID_Library/2Medical_Guidelines/ESCMID_Guideline_s/fulltext_Data_review_and_recommendations_for_diagnosing_Clostridium_difficile-infection.pdf">https://www.escmid.org/fileadmin/src/media/PDFs/4ESCMID_Library/2Medical_Guidelines/ESCMID_Guideline_s/fulltext_Data_review_and_recommendations_for_diagnosing_Clostridium_difficile-infection.pdf</a>                                                                                                                                                                                                                                              |
|                     | <b>Strength of recommendation</b> | Experts median agreement: strongly agree % of experts agree or strongly agree: 97.4 %<br>Median usefulness rating: very useful % of experts rating items useful or very useful: 84.6 %                                                                                                                                                                                                                                                                                                                                                                                                                                                                                                                                                                                   |
| 61<br>UP            | <b>Rational</b>                   | Metronidazole efficacy comparable to vancomycin in this indication and lower cost.                                                                                                                                                                                                                                                                                                                                                                                                                                                                                                                                                                                                                                                                                       |
|                     | <b>Recommendations</b>            | <u>Metronidazole</u> : suggested dosing regimen for a mild to moderate episode: 500 mg TIW orally, for 10–14 days. IV administration is possible if oral administration is not available.<br><u>Vancomycin</u> : suggested dosing regimen for a 1 <sup>st</sup> severe episode: 125 mg administered orally, 4 times/day, for 10–14 days. 500 mg orally, 4 times/day in case of severe episode with complications +/- metronidazole.<br>The use of fidaxomicin 200 mg BID orally, can also be considered, in particular in case of recurrence.                                                                                                                                                                                                                            |
|                     | <b>References</b>                 | SHEA-IDSA 2010: Clinical Practice Guidelines for <i>Clostridium difficile</i> Infection in Adults:<br><a href="http://www.idsociety.org/uploadedFiles/IDSA/Guidelines-Patient_Care/PDF_Library/cdiff2010a.pdf">http://www.idsociety.org/uploadedFiles/IDSA/Guidelines-Patient_Care/PDF_Library/cdiff2010a.pdf</a><br>ESCMID 2009: treatment guidance document for <i>Clostridium difficile</i> infection:<br><a href="https://www.escmid.org/fileadmin/src/media/PDFs/4ESCMID_Library/2Medical_Guidelines/ESCMID_Guideline_s/fulltext_treatment_guidance_Clostridium_difficile_infection.pdf">https://www.escmid.org/fileadmin/src/media/PDFs/4ESCMID_Library/2Medical_Guidelines/ESCMID_Guideline_s/fulltext_treatment_guidance_Clostridium_difficile_infection.pdf</a> |
|                     | <b>Strength of recommendation</b> | Experts median agreement: strongly agree % of experts agree or strongly agree: 87.2 %<br>Median usefulness rating: useful % of experts rating items useful or very useful: 84.6 %                                                                                                                                                                                                                                                                                                                                                                                                                                                                                                                                                                                        |
| <b>CONSTIPATION</b> |                                   |                                                                                                                                                                                                                                                                                                                                                                                                                                                                                                                                                                                                                                                                                                                                                                          |
| 62<br>OP            | <b>Rational</b>                   | Risk of exacerbation or induction of constipation.                                                                                                                                                                                                                                                                                                                                                                                                                                                                                                                                                                                                                                                                                                                       |
|                     | <b>Remark</b>                     | * <u>Non-exhaustive list of drugs that may cause iatrogenic constipation</u> : drugs with anticholinergic properties** (tricyclic antidepressants, antihistamines, antimuscarinics, some anti-Parkinson medications, antipsychotics, antispasmodics, muscle relaxers), some antihypertensives (beta blockers, calcium inhibitors, central-acting antihypertensives), local-acting antacids, calcium carbonate, cholestyramin, iron, neuroleptics, opiates (strong and weak and derivatives: codeine/tramadol), transit retarders.                                                                                                                                                                                                                                        |
|                     | <b>Useful link</b>                | **Evaluation scales for the anticholinergic effect of drugs:<br><a href="http://gerontoprevention.free.fr/articles/Anticholinergiques.pdf">http://gerontoprevention.free.fr/articles/Anticholinergiques.pdf</a>                                                                                                                                                                                                                                                                                                                                                                                                                                                                                                                                                          |
|                     | <b>Strength of recommendation</b> | Experts median agreement: agree % of experts agree or strongly agree: 92.3 %<br>Median usefulness rating: useful % of experts rating items useful or very useful: 71.8 %                                                                                                                                                                                                                                                                                                                                                                                                                                                                                                                                                                                                 |
| <b>RHEUMATOLOGY</b> |                                   |                                                                                                                                                                                                                                                                                                                                                                                                                                                                                                                                                                                                                                                                                                                                                                          |
| <b>GOUT</b>         |                                   |                                                                                                                                                                                                                                                                                                                                                                                                                                                                                                                                                                                                                                                                                                                                                                          |
| 63<br>UP            | <b>Rational</b>                   | Molecules effective to ease the symptoms of acute gout.                                                                                                                                                                                                                                                                                                                                                                                                                                                                                                                                                                                                                                                                                                                  |
|                     | <b>Recommendations</b>            | <u>Suggested dosing regimens</u> :<br><u>Colchicine</u> : do not exceed 2 mg/d in 3 administrations (risk of side effects at high doses).<br><u>NSAIDs</u> : full dose unless there are contraindications.<br><u>Prednisone or prednisolone</u> : initial dose 0.5 mg/kg/d for 5 to 10 days, administered orally.                                                                                                                                                                                                                                                                                                                                                                                                                                                        |
|                     | <b>Remarks</b>                    | Full-dose NSAIDs act quickly; they should be avoided in patients with high risk of serious side effects.<br>Colchicine acts more slowly; it should only be offered as 1 <sup>st</sup> line treatment if the outbreak has started within the last 48 hours. The occurrence of gastrointestinal problems (in particular diarrhoea) should be monitored, and the treatment should be adapted in case of combination with a cytochrome P450 or P-glycoprotein inhibitor and in case of altered renal function.<br>Oral or intra-articular glucocorticoids (gout affecting 1 or 2 major joints) are one possible alternative, in particular if NSAIDs are contraindicated or in case of renal failure.                                                                        |
|                     | <b>References</b>                 | ACR 2012: Management of Gout Part II:<br><a href="http://www.ncbi.nlm.nih.gov/pmc/articles/PMC3662546/pdf/nihms416577.pdf">http://www.ncbi.nlm.nih.gov/pmc/articles/PMC3662546/pdf/nihms416577.pdf</a>                                                                                                                                                                                                                                                                                                                                                                                                                                                                                                                                                                   |

|          |                                   |                                                                                                                                                                                                                                                                                                                                                                                                                                                                                                                                                                                                                                                                                                                                                                                                                                                                                |
|----------|-----------------------------------|--------------------------------------------------------------------------------------------------------------------------------------------------------------------------------------------------------------------------------------------------------------------------------------------------------------------------------------------------------------------------------------------------------------------------------------------------------------------------------------------------------------------------------------------------------------------------------------------------------------------------------------------------------------------------------------------------------------------------------------------------------------------------------------------------------------------------------------------------------------------------------|
|          |                                   | EULAR 2011: recommendations for calcium pyrophosphate deposition. Part II: Management: <a href="http://ard.bmj.com/content/70/4/571.full.pdf+html">http://ard.bmj.com/content/70/4/571.full.pdf+html</a><br>EULAR 2006: evidence based recommendations for gout. Part II: Management: <a href="http://www.ncbi.nlm.nih.gov/pmc/articles/PMC1798308/pdf/1312.pdf">http://www.ncbi.nlm.nih.gov/pmc/articles/PMC1798308/pdf/1312.pdf</a>                                                                                                                                                                                                                                                                                                                                                                                                                                          |
|          | <b>Strength of recommendation</b> | Experts median agreement: agree % of experts agree or strongly agree: 92.3 %<br>Median usefulness rating: useful % of experts rating items useful or very useful: 92.3 %                                                                                                                                                                                                                                                                                                                                                                                                                                                                                                                                                                                                                                                                                                       |
| 64<br>UP | <b>Rational</b>                   | Symptomatic hyperuricaemia and gout attacks are associated with certain renal, cardiovascular and metabolic pathologies, responsible for increased long-term morbidity and a deteriorated quality of life.                                                                                                                                                                                                                                                                                                                                                                                                                                                                                                                                                                                                                                                                     |
|          | <b>Recommendations</b>            | <u>Suggested dosing regimens:</u><br>initial dosing regimen ≤ 100 mg QD, optionally gradually increased in order to obtain a uric acid level ≤ 6 mg/dl or 360 µmol/l (low initial doses decreased the risk of hypersensitivity).<br>Recommended doses: 100–200 mg optionally increased to 300–600 mg in moderate cases, or even 700 to 900 mg/day in severe cases.<br>The doses will be adapted in case of renal failure.                                                                                                                                                                                                                                                                                                                                                                                                                                                      |
|          | <b>Remarks</b>                    | *Asymptomatic hyperuricemia alone is not an indication to be treated.<br>It may be preferred to start background treatment separately from a gout attack (1 to 2 weeks after inflammation has decreased) due to the risk of exacerbation of the attack.<br>If allopurinol is not tolerated, a xanthine oxidase inhibitor (ex: febuxostat) or a uricosuric (ex: probenecid) may be considered.<br><br>*Conditions under which treatment to reduce the uric acid level is necessary: recurring gout attacks (≥ 2/year) or severe attacks (presence of tophus, arthroplasty, or radiographic changes), renal failure ≥ stage 2, history of urinary lithiasis, lifestyle and dietary measures insufficient (weight loss, diet modifications, reduced alcohol consumption, in particular beer, stopping diuretics, care for comorbidity, quitting tobacco use).                     |
|          | <b>References</b>                 | ACR 2012: Management of Gout Part I: <a href="http://www.ncbi.nlm.nih.gov/pmc/articles/PMC3683400/pdf/nihms416576.pdf">http://www.ncbi.nlm.nih.gov/pmc/articles/PMC3683400/pdf/nihms416576.pdf</a><br>ACR 2012: Management of Gout Part II: <a href="http://www.ncbi.nlm.nih.gov/pmc/articles/PMC3662546/pdf/nihms416577.pdf">http://www.ncbi.nlm.nih.gov/pmc/articles/PMC3662546/pdf/nihms416577.pdf</a><br>Richette P, et al. Gout. Lancet 2010 [abstract]: <a href="http://www.thelancet.com/journals/lancet/article/PIIS0140-6736(09)60883-7/abstract">http://www.thelancet.com/journals/lancet/article/PIIS0140-6736(09)60883-7/abstract</a><br>EULAR 2006: Evidence based recommendations for gout. Part II: Management: <a href="http://www.ncbi.nlm.nih.gov/pmc/articles/PMC1798308/pdf/1312.pdf">http://www.ncbi.nlm.nih.gov/pmc/articles/PMC1798308/pdf/1312.pdf</a> |
|          |                                   | <b>Strength of recommendation</b>                                                                                                                                                                                                                                                                                                                                                                                                                                                                                                                                                                                                                                                                                                                                                                                                                                              |
| 65<br>UP | <b>Rational</b>                   | Modifying the uric acid levels may cause a gout attack.                                                                                                                                                                                                                                                                                                                                                                                                                                                                                                                                                                                                                                                                                                                                                                                                                        |
|          | <b>Recommendations</b>            | <u>Suggested dosing regimens:</u><br>Colchicine 0.5 to 1 mg/day during the titration of the background treatment (up to 6 months).<br>Decrease the doses in case of combination with cytochrome P450 or P-glycoprotein inhibitors and in case of renal failure or in patients ≥ 75 years.                                                                                                                                                                                                                                                                                                                                                                                                                                                                                                                                                                                      |
|          | <b>Remark</b>                     | Prednisone or low-dose prednisolone may be used as 2 <sup>nd</sup> line treatment if NSAIDs and colchicine are contraindicated, ineffective or poorly tolerated.                                                                                                                                                                                                                                                                                                                                                                                                                                                                                                                                                                                                                                                                                                               |
|          | <b>Reference</b>                  | EULAR 2006: Evidence based recommendations for gout. Part II: Management: <a href="http://www.ncbi.nlm.nih.gov/pmc/articles/PMC1798308/pdf/1312.pdf">http://www.ncbi.nlm.nih.gov/pmc/articles/PMC1798308/pdf/1312.pdf</a>                                                                                                                                                                                                                                                                                                                                                                                                                                                                                                                                                                                                                                                      |
|          | <b>Strength of recommendation</b> | Experts median agreement: agree % of experts agree or strongly agree: 92.3 %<br>Median usefulness rating: useful % of experts rating items useful or very useful: 89.7 %                                                                                                                                                                                                                                                                                                                                                                                                                                                                                                                                                                                                                                                                                                       |
| 66<br>OP | <b>Rational</b>                   | Risk of gout attack.                                                                                                                                                                                                                                                                                                                                                                                                                                                                                                                                                                                                                                                                                                                                                                                                                                                           |
|          | <b>Remark</b>                     | * <u>Non-exhaustive list of drugs that may increase uric acid levels:</u> chemotherapy, cyclosporine, diuretics (loop and thiazide in particular, by inhibiting the renal excretion of urates), ethambutol, interferon, levodopa, pyrazinamide, ribavirin, salicylates (low dose), tacrolimus, teriparatide.<br>In the treatment of high blood pressure, avoid the use of diuretics if possible.                                                                                                                                                                                                                                                                                                                                                                                                                                                                               |
|          | <b>References</b>                 | Roddy E, et al. Epidemiology of gout. Arthritis Research & Therapy 2010: <a href="http://arthritis-research.com/content/pdf/ar3199.pdf">http://arthritis-research.com/content/pdf/ar3199.pdf</a><br>Richette P, et al. Gout (review). Lancet 2010 [abstract] : <a href="http://www.thelancet.com/journals/lancet/article/PIIS0140-6736(09)60883-7/fulltext">http://www.thelancet.com/journals/lancet/article/PIIS0140-6736(09)60883-7/fulltext</a>                                                                                                                                                                                                                                                                                                                                                                                                                             |
|          | <b>Strength of</b>                | Experts median agreement: agree % of experts agree or strongly agree: 97.4 %                                                                                                                                                                                                                                                                                                                                                                                                                                                                                                                                                                                                                                                                                                                                                                                                   |

|                                         | <b>recommendation</b>             | Median usefulness rating: useful                                                                                                                                                                                                                                                                                                                                                                                                                                                                                                                                                                                                                                                                         | % of experts rating items useful or very useful: 79.5 %                                                 |
|-----------------------------------------|-----------------------------------|----------------------------------------------------------------------------------------------------------------------------------------------------------------------------------------------------------------------------------------------------------------------------------------------------------------------------------------------------------------------------------------------------------------------------------------------------------------------------------------------------------------------------------------------------------------------------------------------------------------------------------------------------------------------------------------------------------|---------------------------------------------------------------------------------------------------------|
| <b>RHEUMATOID ARTHRITIS</b>             |                                   |                                                                                                                                                                                                                                                                                                                                                                                                                                                                                                                                                                                                                                                                                                          |                                                                                                         |
| 67<br>Other                             | <b>Rational</b>                   | Increased risk of transaminase elevation, hepatotoxicity, nephrotoxicity and leukopaenia.                                                                                                                                                                                                                                                                                                                                                                                                                                                                                                                                                                                                                |                                                                                                         |
|                                         | <b>Recommendations</b>            | Monitoring every 2 to 4 weeks for 3 months, then every 8 to 12 weeks for the following 3 months, then every 12 weeks. More often if combined with another hepatotoxic or haematotoxic drug*.                                                                                                                                                                                                                                                                                                                                                                                                                                                                                                             |                                                                                                         |
|                                         | <b>Remarks</b>                    | * <u>Non-exhaustive list of molecules often combined and that may be hepatotoxic or haematotoxic</u> : azathioprine, cyclosporine, leflunomide, retinoids, sulfasalazine, trimethoprim-sulfamethoxazole.<br><u>Non-exhaustive list of nephrotoxic drugs</u> : NSAIDs, allopurinol, amphotericin B, some antibiotics: aminoglycosides, cephalosporins, penicillins, quinolones, sulfamides, vancomycin, some antivirals: aciclovir, ganciclovir, foscarnet, antialdosterones, anticalcineurins, diuretics, direct renin inhibitors, lithium, methotrexate.                                                                                                                                                |                                                                                                         |
|                                         | <b>References</b>                 | ACR 2012: Use of Disease-Modifying Antirheumatic Drugs and Biologic Agents in the Treatment of Rheumatoid Arthritis: <a href="http://onlinelibrary.wiley.com/doi/10.1002/acr.21641/pdf">http://onlinelibrary.wiley.com/doi/10.1002/acr.21641/pdf</a><br>ACR 2008: Use of Nonbiologic and Biologic Disease-Modifying Antirheumatic Drugs in Rheumatoid Arthritis: <a href="http://onlinelibrary.wiley.com/doi/10.1002/art.23721/pdf">http://onlinelibrary.wiley.com/doi/10.1002/art.23721/pdf</a><br>Ho J, et al. Considerations when prescribing trimethoprim-sulfamethoxazole. CMAJ 2011: <a href="http://www.cmaj.ca/content/183/16/1851.full.pdf">http://www.cmaj.ca/content/183/16/1851.full.pdf</a> |                                                                                                         |
|                                         | <b>Strength of recommendation</b> | Experts median agreement: strongly agree<br>Median usefulness rating: useful                                                                                                                                                                                                                                                                                                                                                                                                                                                                                                                                                                                                                             | % of experts agree or strongly agree: 94.9 %<br>% of experts rating items useful or very useful: 92.3 % |
| 68<br>UP                                | <b>Rational</b>                   | Reduced MTX gastrointestinal side effects and hepatotoxicity, prevention of haematotoxicity related to folate deficiency.                                                                                                                                                                                                                                                                                                                                                                                                                                                                                                                                                                                |                                                                                                         |
|                                         | <b>Recommendations</b>            | <u>Suggested dosing regimens</u> : 1 mg QD or 5 mg/week.<br>Folic acid may be given weekly, 24 to 48 hours after taking MTX, or daily except 24 hours before and after taking MTX.<br>Regardless of the administration regimen, folic acid should not be taken on the day of weekly methotrexate administration.                                                                                                                                                                                                                                                                                                                                                                                         |                                                                                                         |
|                                         | <b>Reference</b>                  | Shea B, et al. Folic acid and folinic acid for reducing side effects in patients receiving methotrexate for rheumatoid arthritis (Review). Cochrane 2013 [abstract]: <a href="http://onlinelibrary.wiley.com/doi/10.1002/14651858.CD000951.pub2/pdf/abstract">http://onlinelibrary.wiley.com/doi/10.1002/14651858.CD000951.pub2/pdf/abstract</a>                                                                                                                                                                                                                                                                                                                                                         |                                                                                                         |
|                                         | <b>Strength of recommendation</b> | Experts median agreement: strongly agree<br>Median usefulness rating: very useful                                                                                                                                                                                                                                                                                                                                                                                                                                                                                                                                                                                                                        | % of experts agree or strongly agree: 94.9 %<br>% of experts rating items useful or very useful: 92.3 % |
| 69<br>OP                                | <b>Rational</b>                   | Corticosteroids are effective in the treatment of RA, but the risk/benefit ratio is questionable in long-term treatment.                                                                                                                                                                                                                                                                                                                                                                                                                                                                                                                                                                                 |                                                                                                         |
|                                         | <b>Reference</b>                  | EULAR 2013: management of rheumatoid arthritis with synthetic and biological disease-modifying antirheumatic drugs: <a href="http://ard.bmj.com/content/early/2013/10/23/annrhumdis-2013-204573.full.pdf+html">http://ard.bmj.com/content/early/2013/10/23/annrhumdis-2013-204573.full.pdf+html</a>                                                                                                                                                                                                                                                                                                                                                                                                      |                                                                                                         |
|                                         | <b>Strength of recommendation</b> | Experts median agreement: agree<br>Median usefulness rating: useful                                                                                                                                                                                                                                                                                                                                                                                                                                                                                                                                                                                                                                      | % of experts agree or strongly agree: 94.9 %<br>% of experts rating items useful or very useful: 89.7 % |
| <b>CORTICOSTEROIDS and OSTEOPOROSIS</b> |                                   |                                                                                                                                                                                                                                                                                                                                                                                                                                                                                                                                                                                                                                                                                                          |                                                                                                         |
| 70<br>Other                             | <b>Rational</b>                   | Avoid complications related to long-term administration of corticosteroids                                                                                                                                                                                                                                                                                                                                                                                                                                                                                                                                                                                                                               |                                                                                                         |
|                                         | <b>Recommendations</b>            | * <u>Lifestyle and dietary counseling</u> : diet low in sodium, in sugars with a high glycaemic index, hypocaloric, rich in calcium (minimum: 1200 mg/day), vitamin D (minimum: 800 IU/day), protein and potassium, physical exercise.<br>If the calcium and vitamin D intake are sufficient, provide supplements.                                                                                                                                                                                                                                                                                                                                                                                       |                                                                                                         |
|                                         | <b>Reference</b>                  | EULAR 2013: management of medium to high-dose glucocorticoid therapy in rheumatic diseases: <a href="http://ard.bmj.com/content/early/2013/07/18/annrhumdis-2013-203249.full.pdf+html">http://ard.bmj.com/content/early/2013/07/18/annrhumdis-2013-203249.full.pdf+html</a>                                                                                                                                                                                                                                                                                                                                                                                                                              |                                                                                                         |
|                                         | <b>Strength of recommendation</b> | Experts median agreement: agree<br>Median usefulness rating: useful                                                                                                                                                                                                                                                                                                                                                                                                                                                                                                                                                                                                                                      | % of experts agree or strongly agree: 94.9 %<br>% of experts rating items useful or very useful: 84.6 % |
| 71<br>UP                                | <b>Rational</b>                   | Possible exacerbation of osteoporosis (including by inhalation).<br>Prevention of bone loss.                                                                                                                                                                                                                                                                                                                                                                                                                                                                                                                                                                                                             |                                                                                                         |
|                                         | <b>Recommendations</b>            | <u>Minimum recommended intake</u> : 1200 mg/day of calcium and 800 IU/day of vitamin D (cholecalciferol).<br>If intake is insufficient, supplement with calcium and vitamin D.                                                                                                                                                                                                                                                                                                                                                                                                                                                                                                                           |                                                                                                         |
|                                         | <b>References</b>                 | Benhamou CL, et al. La vitamine D chez l'adulte : recommandations du GRIIO. Press Med 2011:                                                                                                                                                                                                                                                                                                                                                                                                                                                                                                                                                                                                              |                                                                                                         |

<http://www.grio.org/documents/rcd-10-1361186132.pdf>

ACR 2010: Recommendations for the prevention and treatment of glucocorticoid-induced osteoporosis:

<http://www.guideline.gov/content.aspx?id=32422>

NHLBI/NIH 2007: Guidelines for the Diagnosis and Management of Asthma:

<http://www.nhlbi.nih.gov/guidelines/asthma/asthsumm.pdf>

**Strength of recommendation** Experts median agreement: strongly agree % of experts agree or strongly agree: 97.4 %  
Median usefulness rating: very useful % of experts rating items useful or very useful: 97.4 %

**Rational** Prevention and treatment of corticosteroids-induced osteoporosis (including by inhalation).  
\*In patients with an increased fracture risk, taking corticosteroids increases the risk of fracture (anticipated duration  $\geq 3$  months and/or dose  $\geq 7.5$  mg of prednisone/d).  
\*\*In patients with a high risk of osteoporosis, taking corticosteroids, including by inhalation, on a long-term basis and at medium or high doses, increases the risk of osteoporosis.

**Recommendations** \*A bone density measurement and use of the FRAX score\*\* make it possible to evaluate fracture risk.

\*Patients with increased risk of fracture: menopausal women, men over the age of 50, non-menopausal women and men under the age of 50 with a history of fractures and receiving CS treatment for an anticipated duration  $\geq 3$  months and/or  $\geq 7.5$  mg of prednisone/d.

Other risk factors: low body mass index, family history of hip fracture, alcohol consumption  $\geq 3$  glasses/d, tobacco use, high doses of CS, high cumulative doses of CS, significant decrease in bone density.

**Useful link** \*\*FRAX: Fracture Risk Evaluation Tool:  
<https://www.shef.ac.uk/FRAX/tool.jsp?lang=en>

**References** ACR 2010: recommendations for the prevention and treatment of glucocorticoid-induced osteoporosis:  
<http://www.guideline.gov/content.aspx?id=32422>  
NHLBI/NIH 2007: Guidelines for the Diagnosis and Management of Asthma:  
<http://www.nhlbi.nih.gov/guidelines/asthma/asthsumm.pdf>

**Strength of recommendation** Experts median agreement: strongly agree % of experts agree or strongly agree: 92.3 %  
Median usefulness rating: useful % of experts rating items useful or very useful: 87.2 %

**Rational** Prevention of bisphosphonates' side effects: hypocalcaemia and may cause osteonecrosis of the jaw (in particular in case of a parenteral treatment).  
Risk of oesophageal erosion and ulcers.  
Decreased absorption of bisphosphonates in the presence of cations.

**Recommendations** \*A dental exam and appropriate preventive dental care should be considered before beginning treatment with bisphosphonates in patients with related risk factors (for example: cancer, chemotherapy, radiotherapy, corticotherapy, poor oral hygiene) due to the risk of osteonecrosis of the jaw.

Monitoring kidney function is also useful.

\*\*30 minutes before breakfast, with tap water.

\*\*\*Example of drugs that should not be taken with bisphosphonates: calcium supplements.

**Reference** Summary of products characteristics

**Strength of recommendation** Experts median agreement: strongly agree % of experts agree or strongly agree: 97.4 %  
Median usefulness rating: very useful % of experts rating items useful or very useful: 94.9 %

## NEUROLOGY

### EPILEPSY and ANTI-EPILEPTICS

**Rational** Risk of unbalancing treatment and of epileptic attacks, in particular in case of uncontrolled or recent epilepsy.

**Recommendation** Favour a therapeutic alternative or monitor signs of destabilisation of the treatment.

**Remark** \*Non-exhaustive list of molecules lowering the epileptogenic threshold: alcohol, amphetamines, general and local anaesthetics (lidocaine, enflurane, ketamine), some antalgics (tramadol), antihistamines (theophylline, methylxanthines), anticholinergics, antidepressants (tricyclic antidepressants, SSRIs, bupropion), antihistamines, anti-infectives (injectable penicillins, cephalosporins, fluoroquinolones, isoniazid poisoning, metronidazole, pyrimethamine, foscarnet, mefloquine), some antineoplastics (busulfan, carmustine (bcnu), chlorambucil, cytosine arabinoside, methotrexate, vincristine), antipsychotics (phenothiazines, haloperidol), domperidone, flumazenil, immunosuppressants: (cyclosporine, tacrolimus), lithium, methylphenidate, sympathomimetics (ephedrine, phenylpropanolamine, terbutaline), some vaccines.

|                                                        |                                   |                                                                                                                                                                                                                                                                                                                                                                                                                                                                                                                                                                                                                                                                                                                                                                                                                                                                                                                                                                                                                                                                                                                                                                                                                                               |
|--------------------------------------------------------|-----------------------------------|-----------------------------------------------------------------------------------------------------------------------------------------------------------------------------------------------------------------------------------------------------------------------------------------------------------------------------------------------------------------------------------------------------------------------------------------------------------------------------------------------------------------------------------------------------------------------------------------------------------------------------------------------------------------------------------------------------------------------------------------------------------------------------------------------------------------------------------------------------------------------------------------------------------------------------------------------------------------------------------------------------------------------------------------------------------------------------------------------------------------------------------------------------------------------------------------------------------------------------------------------|
|                                                        | <b>References</b>                 | Public Health England 2013: Guidelines for malaria prevention in travellers from the UK: <a href="http://www.hpa.org.uk/webc/HPAwebFile/HPAweb_C/1203496943523">http://www.hpa.org.uk/webc/HPAwebFile/HPAweb_C/1203496943523</a><br>Desfossés C, et al. Les médicaments qui abaissent le seuil de convulsions. Le Médecin du Québec 2002 : <a href="http://www.fmoq.org/Lists/FMOQDocumentLibrary/fr/Le%20M%C3%A9decin%20du%20Qu%20C3%A9bec/Arc_hives/2000%20-%202009/105-109DESFOSES1202.pdf">http://www.fmoq.org/Lists/FMOQDocumentLibrary/fr/Le%20M%C3%A9decin%20du%20Qu%20C3%A9bec/Arc_hives/2000%20-%202009/105-109DESFOSES1202.pdf</a><br>Hantson P. Convulsions d'origine toxique. Réanimation 2004 (Mise au point) : <a href="http://www.srlf.org/rc/org/srlf/htm/Article/2011/20110808-095540-315/src/htm_fullText/fr/0407-Reanimation-Vol13-N5-p343_348.pdf">http://www.srlf.org/rc/org/srlf/htm/Article/2011/20110808-095540-315/src/htm_fullText/fr/0407-Reanimation-Vol13-N5-p343_348.pdf</a><br>The Treatment of Epilepsy: Principles and Practice 4th ed, Gupta A, Lachhwani DK: Eisenschenk S, Gilmore RL. Seizures associated with nonneurologic medical conditions. (Eds), Lippincott Williams & Wilkins, Philadelphia 2006 |
|                                                        | <b>Strength of recommendation</b> | Experts median agreement: strongly agree % of experts agree or strongly agree: 97.4 %<br>Median usefulness rating: useful % of experts rating items useful or very useful: 94.9 %                                                                                                                                                                                                                                                                                                                                                                                                                                                                                                                                                                                                                                                                                                                                                                                                                                                                                                                                                                                                                                                             |
| 75<br>DDI                                              | <b>Rational</b>                   | Anti-epileptics (except gabapentin, pregabalin, vigabatrin and levetiracetam), at least partially, undergo hepatic metabolism.<br>Some anti-epileptics are enzyme inducers or inhibitors.<br>Risk of toxicity, imbalance or ineffectiveness of various treatments.                                                                                                                                                                                                                                                                                                                                                                                                                                                                                                                                                                                                                                                                                                                                                                                                                                                                                                                                                                            |
|                                                        | <b>Recommendation</b>             | Favour a therapeutic alternative or propose a therapeutic drug concentration monitoring of the anti-epileptics and/or associated treatments.                                                                                                                                                                                                                                                                                                                                                                                                                                                                                                                                                                                                                                                                                                                                                                                                                                                                                                                                                                                                                                                                                                  |
|                                                        | <b>Remarks</b>                    | <u>Enzyme-inducing anti-epileptics</u> : carbamazepine, lacosamide, lamotrigine, oxcarbazepine, phenytoin, primidone, topiramate, zonisamide.<br><u>Enzyme-inhibiting anti-epileptics</u> : valproic acid, topiramate, felbamate.                                                                                                                                                                                                                                                                                                                                                                                                                                                                                                                                                                                                                                                                                                                                                                                                                                                                                                                                                                                                             |
|                                                        | <b>Useful link</b>                | *HUG 2014: Drug interactions, cytochromes P450 and P-glycoprotein (Pgp): <a href="http://www.hug-ge.ch/sites/interhug/files/structures/pharmacologie_et_toxicologie_cliniques/documents/interactions_medicamenteuses_et_cyp450.pdf">http://www.hug-ge.ch/sites/interhug/files/structures/pharmacologie_et_toxicologie_cliniques/documents/interactions_medicamenteuses_et_cyp450.pdf</a>                                                                                                                                                                                                                                                                                                                                                                                                                                                                                                                                                                                                                                                                                                                                                                                                                                                      |
|                                                        | <b>References</b>                 | ILAE 2008: Antiepileptic drugs—best practice guidelines for therapeutic drug monitoring: <a href="http://rc.kfshrc.edu.sa/rcf/E_Library/Epilepsy/Epilepsia%201-38%202008.pdf">http://rc.kfshrc.edu.sa/rcf/E_Library/Epilepsy/Epilepsia%201-38%202008.pdf</a><br>Patsalos P, et al. The importance of drug interactions in epilepsy therapy. Epilepsia 2002: <a href="http://onlinelibrary.wiley.com/doi/10.1046/j.1528-1157.2002.13001.x/pdf">http://onlinelibrary.wiley.com/doi/10.1046/j.1528-1157.2002.13001.x/pdf</a>                                                                                                                                                                                                                                                                                                                                                                                                                                                                                                                                                                                                                                                                                                                     |
|                                                        | <b>Strength of recommendation</b> | Experts median agreement: strongly agree % of experts agree or strongly agree: 97.4 %<br>Median usefulness rating: very useful % of experts rating items useful or very useful: 94.9 %                                                                                                                                                                                                                                                                                                                                                                                                                                                                                                                                                                                                                                                                                                                                                                                                                                                                                                                                                                                                                                                        |
| 76<br>UP                                               | <b>Rational</b>                   | Risk of enzyme induction and of failure of contraception when combining oral or intra-vaginal contraceptives, patches or pure progestogen pills are used and risk of foetal malformation.                                                                                                                                                                                                                                                                                                                                                                                                                                                                                                                                                                                                                                                                                                                                                                                                                                                                                                                                                                                                                                                     |
|                                                        | <b>Recommendation</b>             | <u>Other suggested contraceptive</u> : *e.g. intra-uterine devices with copper or delivering levonorgesterel, condoms.                                                                                                                                                                                                                                                                                                                                                                                                                                                                                                                                                                                                                                                                                                                                                                                                                                                                                                                                                                                                                                                                                                                        |
|                                                        | <b>Remark</b>                     | ** <u>Non-exhaustive list of anti-epileptics interacting with oral or intra-vaginal contraceptives</u> : carbamazepine, oxcarbazepine, phenytoin, primidone, topiramate.                                                                                                                                                                                                                                                                                                                                                                                                                                                                                                                                                                                                                                                                                                                                                                                                                                                                                                                                                                                                                                                                      |
|                                                        | <b>Reference</b>                  | WHO 2009 : Medical eligibility criteria for contraceptive use – 4 <sup>th</sup> ed : <a href="http://www.spdc.pt/files/publicacoes/5_11292_2.pdf">http://www.spdc.pt/files/publicacoes/5_11292_2.pdf</a>                                                                                                                                                                                                                                                                                                                                                                                                                                                                                                                                                                                                                                                                                                                                                                                                                                                                                                                                                                                                                                      |
|                                                        | <b>Strength of recommendation</b> | Experts median agreement: strongly agree % of experts agree or strongly agree: 97.4 %<br>Median usefulness rating: useful % of experts rating items useful or very useful: 84.6 %                                                                                                                                                                                                                                                                                                                                                                                                                                                                                                                                                                                                                                                                                                                                                                                                                                                                                                                                                                                                                                                             |
| <b>PARKINSON'S DISEASE and PARKINSON'S MEDICATIONS</b> |                                   |                                                                                                                                                                                                                                                                                                                                                                                                                                                                                                                                                                                                                                                                                                                                                                                                                                                                                                                                                                                                                                                                                                                                                                                                                                               |
| 77<br>UP                                               | <b>Rational</b>                   | In case of abrupt stop or unplanned modification of the treatment, risk of imbalance of Parkinson's disease, complications (falls, fractures, inhalation pneumopathy) and malignant hyperthermia.                                                                                                                                                                                                                                                                                                                                                                                                                                                                                                                                                                                                                                                                                                                                                                                                                                                                                                                                                                                                                                             |
|                                                        | <b>Recommendations</b>            | Continue treatment at the usual doses, times and dosing forms.<br>In case of difficulty swallowing or fasting for several days, adapt the dosing form and dose in agreement with a neurologist.<br>See a neurologist, pharmacist or pharmacologist if needed.                                                                                                                                                                                                                                                                                                                                                                                                                                                                                                                                                                                                                                                                                                                                                                                                                                                                                                                                                                                 |
|                                                        | <b>Remark</b>                     | <u>Substitution and equivalence rules for doses are available at this link</u> :<br>Emergency management of patients with Parkinson's: <a href="http://www.parkinsons.org.uk/sites/default/files/publications/download/english/pk0135_emergencymagement.pdf">http://www.parkinsons.org.uk/sites/default/files/publications/download/english/pk0135_emergencymagement.pdf</a>                                                                                                                                                                                                                                                                                                                                                                                                                                                                                                                                                                                                                                                                                                                                                                                                                                                                  |
|                                                        | <b>Useful link</b>                | Get It On Time campaign 2010: Going into Hospital: <a href="http://www.parkinsons.org.uk/sites/default/files/publications/download/english/fs61_goingintohospital.doc">http://www.parkinsons.org.uk/sites/default/files/publications/download/english/fs61_goingintohospital.doc</a>                                                                                                                                                                                                                                                                                                                                                                                                                                                                                                                                                                                                                                                                                                                                                                                                                                                                                                                                                          |



|                                          |                                   |                                                                                                                                                                                                                                                                                                                                                                                                                                                                                                                                                                                                                                                                                                                                                                                                                                                                                                                                                                                                                                                                                                                                                                                                                                                                                                                                                                                                                                                                                                                                                                                                                                                                                                                                                                      |                                                                                                         |
|------------------------------------------|-----------------------------------|----------------------------------------------------------------------------------------------------------------------------------------------------------------------------------------------------------------------------------------------------------------------------------------------------------------------------------------------------------------------------------------------------------------------------------------------------------------------------------------------------------------------------------------------------------------------------------------------------------------------------------------------------------------------------------------------------------------------------------------------------------------------------------------------------------------------------------------------------------------------------------------------------------------------------------------------------------------------------------------------------------------------------------------------------------------------------------------------------------------------------------------------------------------------------------------------------------------------------------------------------------------------------------------------------------------------------------------------------------------------------------------------------------------------------------------------------------------------------------------------------------------------------------------------------------------------------------------------------------------------------------------------------------------------------------------------------------------------------------------------------------------------|---------------------------------------------------------------------------------------------------------|
|                                          | <b>Strength of recommendation</b> | Experts median agreement: agree<br>Median usefulness rating: useful                                                                                                                                                                                                                                                                                                                                                                                                                                                                                                                                                                                                                                                                                                                                                                                                                                                                                                                                                                                                                                                                                                                                                                                                                                                                                                                                                                                                                                                                                                                                                                                                                                                                                                  | % of experts agree or strongly agree: 94.9 %<br>% of experts rating items useful or very useful: 76.9 % |
| <b>INSOMNIA, SEDATIVES and HYPNOTICS</b> |                                   |                                                                                                                                                                                                                                                                                                                                                                                                                                                                                                                                                                                                                                                                                                                                                                                                                                                                                                                                                                                                                                                                                                                                                                                                                                                                                                                                                                                                                                                                                                                                                                                                                                                                                                                                                                      |                                                                                                         |
| <b>82<br/>OP</b>                         | <b>Rational</b>                   | Avoid the long-term use of hypnotics. Risk of rebound effect, withdrawal syndrome, secondary complications if treatment is stopped abruptly.                                                                                                                                                                                                                                                                                                                                                                                                                                                                                                                                                                                                                                                                                                                                                                                                                                                                                                                                                                                                                                                                                                                                                                                                                                                                                                                                                                                                                                                                                                                                                                                                                         |                                                                                                         |
|                                          | <b>Recommendations</b>            | Stop these treatments gradually, based on the length of the treatment.<br>In some cases, weaning over several months may be necessary.                                                                                                                                                                                                                                                                                                                                                                                                                                                                                                                                                                                                                                                                                                                                                                                                                                                                                                                                                                                                                                                                                                                                                                                                                                                                                                                                                                                                                                                                                                                                                                                                                               |                                                                                                         |
|                                          | <b>Reference</b>                  | Schutte-Rodin S, et al. Clinical Guideline for the Evaluation and Management of Chronic Insomnia in Adults. Journal of Clinical Sleep Medicine 2008:<br><a href="http://www.ncbi.nlm.nih.gov/pmc/articles/PMC2576317/pdf/jcsm.4.5.487.pdf">http://www.ncbi.nlm.nih.gov/pmc/articles/PMC2576317/pdf/jcsm.4.5.487.pdf</a>                                                                                                                                                                                                                                                                                                                                                                                                                                                                                                                                                                                                                                                                                                                                                                                                                                                                                                                                                                                                                                                                                                                                                                                                                                                                                                                                                                                                                                              |                                                                                                         |
|                                          | <b>Strength of recommendation</b> | Experts median agreement: strongly agree<br>Median usefulness rating: useful                                                                                                                                                                                                                                                                                                                                                                                                                                                                                                                                                                                                                                                                                                                                                                                                                                                                                                                                                                                                                                                                                                                                                                                                                                                                                                                                                                                                                                                                                                                                                                                                                                                                                         | % of experts agree or strongly agree: 97.4 %<br>% of experts rating items useful or very useful: 97.4 % |
| <b>83<br/>OP</b>                         | <b>Rational</b>                   | Significant side effects.                                                                                                                                                                                                                                                                                                                                                                                                                                                                                                                                                                                                                                                                                                                                                                                                                                                                                                                                                                                                                                                                                                                                                                                                                                                                                                                                                                                                                                                                                                                                                                                                                                                                                                                                            |                                                                                                         |
|                                          | <b>Recommendation</b>             | As 1 <sup>st</sup> line treatment: favour a BZD with a short to medium half-life or a BZD related drug.                                                                                                                                                                                                                                                                                                                                                                                                                                                                                                                                                                                                                                                                                                                                                                                                                                                                                                                                                                                                                                                                                                                                                                                                                                                                                                                                                                                                                                                                                                                                                                                                                                                              |                                                                                                         |
|                                          | <b>Reference</b>                  | NIH 2005: Manifestations and Management of Chronic Insomnia in Adults:<br><a href="http://consensus.nih.gov/2005/insomniastatement.pdf">http://consensus.nih.gov/2005/insomniastatement.pdf</a>                                                                                                                                                                                                                                                                                                                                                                                                                                                                                                                                                                                                                                                                                                                                                                                                                                                                                                                                                                                                                                                                                                                                                                                                                                                                                                                                                                                                                                                                                                                                                                      |                                                                                                         |
|                                          | <b>Strength of recommendation</b> | Experts median agreement: strongly agree<br>Median usefulness rating: useful                                                                                                                                                                                                                                                                                                                                                                                                                                                                                                                                                                                                                                                                                                                                                                                                                                                                                                                                                                                                                                                                                                                                                                                                                                                                                                                                                                                                                                                                                                                                                                                                                                                                                         | % of experts agree or strongly agree: 87.2 %<br>% of experts rating items useful or very useful: 87.2 % |
| <b>SCHIZOPHRENIA and NEUROLEPTICS</b>    |                                   |                                                                                                                                                                                                                                                                                                                                                                                                                                                                                                                                                                                                                                                                                                                                                                                                                                                                                                                                                                                                                                                                                                                                                                                                                                                                                                                                                                                                                                                                                                                                                                                                                                                                                                                                                                      |                                                                                                         |
| <b>84<br/>DDI</b>                        | <b>Rational</b>                   | Risk of torsade de pointes.                                                                                                                                                                                                                                                                                                                                                                                                                                                                                                                                                                                                                                                                                                                                                                                                                                                                                                                                                                                                                                                                                                                                                                                                                                                                                                                                                                                                                                                                                                                                                                                                                                                                                                                                          |                                                                                                         |
|                                          | <b>Recommendations</b>            | Monitor the electrocardiogram if use is necessary, correct any hypokalaemia or hypomagnesaemia and avoid the concomitant use of bradycardiac molecules.<br>If a long QTc syndrome appears, related to taking the drugs, look for interaction, for overdose, for the presence of several at-risk drugs and adapt the patient's treatment.                                                                                                                                                                                                                                                                                                                                                                                                                                                                                                                                                                                                                                                                                                                                                                                                                                                                                                                                                                                                                                                                                                                                                                                                                                                                                                                                                                                                                             |                                                                                                         |
|                                          | <b>Remarks</b>                    | * <u>Non-exhaustive list of drugs that may cause an elongation of the QT interval</u> : some antiarrhythmics (amiodarone, disopyramide, dofetilide, dronedarone, flecainide, ibutilide, procainamide, quinidine, sotalol), some antibiotics (azithromycin, bedaquiline, ciprofloxacin, clarithromycin, erythromycin, levofloxacin, moxifloxacin, norfloxacin, ofloxacin, pentamidine, roxithromycin, spitamycin IV, telithromycin, trimethoprim-sulfamethoxazole), some antineoplastics (arsenic, dabrafenib, eribulin, lapatinib, nilotinib, sunitinib, tamoxifen, vorinostat), some antidepressants (amitriptyline, amoxapine, citalopram, clomipramine, desipramine, doxepin, escitalopram, fluoxetine, imipramine, mirtazapine, nortriptyline, paroxetine, protriptyline, sertraline, trazodone, trimipramine, venlafaxine), some antifungals (fluconazole, itraconazole, ketoconazole, posaconazole, voriconazole), some antimalarials (chloroquine, halofantrine, quinine sulphate), some antivirals (amantadine, atazanavir, foscarnet, nelfinavir, rilpivirine, ritonavir, saquinavir, telaprevir), methadone, neuroleptics (amisulpride, aripiprazole, chlorpromazine, clozapine, cyamemazine, domperidone, droperidol, fluphenazine, haloperidol, levomepromazine, olanzapine, pimozide, pipamperone, promethazine, quetiapine, risperidone, sertindole, sulpiride, sultopride, tiapride, zuclopenthixol).<br><br><u>Risk factors for elongation of the QTc interval</u> : age > 65 years, female, cardiopathies: heart failure, ischaemia, myocardial hypertrophy, bradycardia, 2 <sup>nd</sup> or 3 <sup>rd</sup> degree atrial-ventricular block, electrolytic disorders (in particular hypokalaemia and hypomagnesaemia), congenital long QT syndrome. |                                                                                                         |
|                                          | <b>Useful link</b>                | Crediblemeds: All QTDrugs: <a href="http://www.crediblemeds.org/everyone/composite-list-all-qtodrugs/?rf=All">http://www.crediblemeds.org/everyone/composite-list-all-qtodrugs/?rf=All</a>                                                                                                                                                                                                                                                                                                                                                                                                                                                                                                                                                                                                                                                                                                                                                                                                                                                                                                                                                                                                                                                                                                                                                                                                                                                                                                                                                                                                                                                                                                                                                                           |                                                                                                         |
|                                          | <b>Reference</b>                  | WFSBP 2012: Guidelines for Biological Treatment of Schizophrenia, Part 2:<br><a href="http://www.wfsbp.org/fileadmin/user_upload/Treatment_Guidelines/WFSBP_SZ_Guidelines_Part1_2012.pdf">http://www.wfsbp.org/fileadmin/user_upload/Treatment_Guidelines/WFSBP_SZ_Guidelines_Part1_2012.pdf</a>                                                                                                                                                                                                                                                                                                                                                                                                                                                                                                                                                                                                                                                                                                                                                                                                                                                                                                                                                                                                                                                                                                                                                                                                                                                                                                                                                                                                                                                                     |                                                                                                         |
|                                          | <b>Strength of recommendation</b> | Experts median agreement: strongly agree<br>Median usefulness rating: useful                                                                                                                                                                                                                                                                                                                                                                                                                                                                                                                                                                                                                                                                                                                                                                                                                                                                                                                                                                                                                                                                                                                                                                                                                                                                                                                                                                                                                                                                                                                                                                                                                                                                                         | % of experts agree or strongly agree: 94.9 %<br>% of experts rating items useful or very useful: 94.9 % |
| <b>PAIN and ANALGESIA</b>                |                                   |                                                                                                                                                                                                                                                                                                                                                                                                                                                                                                                                                                                                                                                                                                                                                                                                                                                                                                                                                                                                                                                                                                                                                                                                                                                                                                                                                                                                                                                                                                                                                                                                                                                                                                                                                                      |                                                                                                         |
| <b>NEUROPATHIC PAIN</b>                  |                                   |                                                                                                                                                                                                                                                                                                                                                                                                                                                                                                                                                                                                                                                                                                                                                                                                                                                                                                                                                                                                                                                                                                                                                                                                                                                                                                                                                                                                                                                                                                                                                                                                                                                                                                                                                                      |                                                                                                         |
| <b>85<br/>UP</b>                         | <b>Rational</b>                   | First-line treatments in this indication.                                                                                                                                                                                                                                                                                                                                                                                                                                                                                                                                                                                                                                                                                                                                                                                                                                                                                                                                                                                                                                                                                                                                                                                                                                                                                                                                                                                                                                                                                                                                                                                                                                                                                                                            |                                                                                                         |
|                                          | <b>Remarks</b>                    | * <u>Examples of recommended anticonvulsants</u> : gabapentin or pregabalin.<br>** <u>Examples of recommended antidepressants</u> : tricyclic (amitriptyline, clomipramine,                                                                                                                                                                                                                                                                                                                                                                                                                                                                                                                                                                                                                                                                                                                                                                                                                                                                                                                                                                                                                                                                                                                                                                                                                                                                                                                                                                                                                                                                                                                                                                                          |                                                                                                         |

|                               |                                                                                                                                                                                                                                                                                                                                                                                                                                                                                                                                                                                                                                                                                                                                                                                                                                                                                                                                                                                                                                                                                                                                                                                                                                                                                                                                |
|-------------------------------|--------------------------------------------------------------------------------------------------------------------------------------------------------------------------------------------------------------------------------------------------------------------------------------------------------------------------------------------------------------------------------------------------------------------------------------------------------------------------------------------------------------------------------------------------------------------------------------------------------------------------------------------------------------------------------------------------------------------------------------------------------------------------------------------------------------------------------------------------------------------------------------------------------------------------------------------------------------------------------------------------------------------------------------------------------------------------------------------------------------------------------------------------------------------------------------------------------------------------------------------------------------------------------------------------------------------------------|
|                               | <p>desipramine, imipramine, nortriptyline) or selective serotonin-norepinephrine reuptake inhibitor (SNRI): duloxetine, venlafaxine.</p> <p>Tramadol (in particular combined with paracetamol/acetaminophen) is indicated as 1<sup>st</sup> line treatment in acute pain exacerbation.</p> <p>Topical lidocaine is also indicated as 1<sup>st</sup> line treatment for elderly patients</p>                                                                                                                                                                                                                                                                                                                                                                                                                                                                                                                                                                                                                                                                                                                                                                                                                                                                                                                                    |
|                               | <p><b>References</b></p> <p>AAN/ AANEM/ AAPMR 2011: Treatment of painful diabetic neuropathy: <a href="http://www.neurology.org/content/76/20/1758.full.pdf+html">http://www.neurology.org/content/76/20/1758.full.pdf+html</a></p> <p>EFNS 2010: Pharmacological treatment of neuropathic pain. European Journal of Neurology 2010: <a href="http://www.efns.org/fileadmin/user_upload/guideline_papers/EFNS_guideline_2010_pharma_treatment_of_neuropathic_pain.pdf">http://www.efns.org/fileadmin/user_upload/guideline_papers/EFNS_guideline_2010_pharma_treatment_of_neuropathic_pain.pdf</a></p> <p>O'Connor A, et al. Treatment of Neuropathic Pain: An Overview of Recent Guidelines. The Am J Med 2009: <a href="http://www.mypharmajobs.com/uploads/M37_W27_Study_OConnor_neuropathic-pain-treatment-guidelines.pdf">http://www.mypharmajobs.com/uploads/M37_W27_Study_OConnor_neuropathic-pain-treatment-guidelines.pdf</a></p> <p>Moulin DE, et al. Pharmacological management of chronic neuropathic pain. Consensus statement and guidelines from the Canadian Pain Society. Pain Res Manage 2007: <a href="http://www.canadianpainsociety.ca/pdf/PharmacologicalManagementChronicPain_CPS-GUIDELINES.pdf">http://www.canadianpainsociety.ca/pdf/PharmacologicalManagementChronicPain_CPS-GUIDELINES.pdf</a></p> |
|                               | <p><b>Strength of recommendation</b></p> <p>Experts median agreement: agree % of experts agree or strongly agree: 97.4 %<br/> Median usefulness rating: useful % of experts rating items useful or very useful: 89.7 %</p>                                                                                                                                                                                                                                                                                                                                                                                                                                                                                                                                                                                                                                                                                                                                                                                                                                                                                                                                                                                                                                                                                                     |
|                               | <p><b>Rational</b></p> <p>Higher efficacy of the combination of two drugs (monitor side effects).</p>                                                                                                                                                                                                                                                                                                                                                                                                                                                                                                                                                                                                                                                                                                                                                                                                                                                                                                                                                                                                                                                                                                                                                                                                                          |
|                               | <p><b>Remarks</b></p> <p>Monitor side effects.</p> <p><u>Examples of recommended opiate analgics</u>: morphine, oxycodone, tramadol +/- combined with paracetamol/acetaminophen.</p> <p><u>*First-line treatments</u>: antidepressant (tricyclic: amitriptyline, clomipramine, desipramine, imipramine, nortriptyline or SNRI: duloxetine, venlafaxine) or an anticonvulsant (gabapentin or pregabalin).</p>                                                                                                                                                                                                                                                                                                                                                                                                                                                                                                                                                                                                                                                                                                                                                                                                                                                                                                                   |
| 86 UP                         | <p><b>References</b></p> <p>NICE 2013: Neuropathic pain – pharmacological management: The pharmacological management of neuropathic pain in adults in non-specialist settings: <a href="http://www.nice.org.uk/guidance/cg173">http://www.nice.org.uk/guidance/cg173</a></p> <p>Chaparro LE, et al. Combination pharmacotherapy for the treatment of neuropathic pain in adults. Cochrane Database Syst Rev. 2012 [abstract]: <a href="http://onlinelibrary.wiley.com/doi/10.1002/14651858.CD008943.pub2/abstract">http://onlinelibrary.wiley.com/doi/10.1002/14651858.CD008943.pub2/abstract</a></p> <p>O'Connor A, et al. Treatment of Neuropathic Pain: An Overview of Recent Guidelines. The Am J Med 2009: <a href="http://www.mypharmajobs.com/uploads/M37_W27_Study_OConnor_neuropathic-pain-treatment-guidelines.pdf">http://www.mypharmajobs.com/uploads/M37_W27_Study_OConnor_neuropathic-pain-treatment-guidelines.pdf</a></p>                                                                                                                                                                                                                                                                                                                                                                                      |
|                               | <p><b>Strength of recommendation</b></p> <p>Experts median agreement: agree % of experts agree or strongly agree: 89.7 %<br/> Median usefulness rating: useful % of experts rating items useful or very useful: 82.1 %</p>                                                                                                                                                                                                                                                                                                                                                                                                                                                                                                                                                                                                                                                                                                                                                                                                                                                                                                                                                                                                                                                                                                     |
| <b>ACUTE PAIN and OPIATES</b> |                                                                                                                                                                                                                                                                                                                                                                                                                                                                                                                                                                                                                                                                                                                                                                                                                                                                                                                                                                                                                                                                                                                                                                                                                                                                                                                                |
|                               | <p><b>Rational</b></p> <p>Effective relief for acute moderate to severe pain.<br/> Favoured administration and dosing route.</p>                                                                                                                                                                                                                                                                                                                                                                                                                                                                                                                                                                                                                                                                                                                                                                                                                                                                                                                                                                                                                                                                                                                                                                                               |
|                               | <p><b>Recommendations</b></p> <p>Mild opioids (level 2): for VAS: 4-6/7 or strong (level 3): VAS: 6/7-10 or pain not controlled by a level 2 analgic combined with a level 1 at maximum doses, depending on the intensity of the pain and the local recommendations.</p> <p>Perform titration with an immediate-release form, then favour an extended release form if the foreseeable duration of the treatment and the situation justify it.</p>                                                                                                                                                                                                                                                                                                                                                                                                                                                                                                                                                                                                                                                                                                                                                                                                                                                                              |
| 87 UP                         | <p><b>Remarks</b></p> <p><u>List of non-exhaustive mild opioids</u>: codeine, dihydrocodeine, tramadol.</p> <p><u>Non-exhaustive list of strong opioids</u>: fentanyl, hydromorphone, morphine (core hydrates, sulphate), oxycodone, pethidine.</p>                                                                                                                                                                                                                                                                                                                                                                                                                                                                                                                                                                                                                                                                                                                                                                                                                                                                                                                                                                                                                                                                            |
|                               | <p><b>References</b></p> <p>WHO 1996 : Cancer pain relief, second edition: <a href="http://apps.who.int/iris/bitstream/10665/37896/1/9241544821.pdf">http://apps.who.int/iris/bitstream/10665/37896/1/9241544821.pdf</a></p> <p>Collège national des enseignants universitaires de la douleur, Collège national des médecins de la douleur, Société française d'accompagnement et de soins palliatifs, Douleurs aiguës, douleurs chroniques, soins palliatifs, Numéro 6 de Modules Med-Line, Modules transdisciplinaires, Med-Line éd., 2001</p>                                                                                                                                                                                                                                                                                                                                                                                                                                                                                                                                                                                                                                                                                                                                                                               |
|                               | <p><b>Strength of recommendation</b></p> <p>Experts median agreement: agree % of experts agree or strongly agree: 92.3 %<br/> Median usefulness rating: useful % of experts rating items useful or very useful: 89.7 %</p>                                                                                                                                                                                                                                                                                                                                                                                                                                                                                                                                                                                                                                                                                                                                                                                                                                                                                                                                                                                                                                                                                                     |
|                               | <p><b>Rational</b></p> <p>Need to ease pain.</p>                                                                                                                                                                                                                                                                                                                                                                                                                                                                                                                                                                                                                                                                                                                                                                                                                                                                                                                                                                                                                                                                                                                                                                                                                                                                               |
|                               | <p><b>Recommendation</b></p> <p>It is suggested, during opiate rotation, to perform a moderate reduction in the equianalgesic dose calculated for the new opiate introduced (25 to 50% of the calculated dose).</p>                                                                                                                                                                                                                                                                                                                                                                                                                                                                                                                                                                                                                                                                                                                                                                                                                                                                                                                                                                                                                                                                                                            |
| 88 Other                      | <p><b>Remark</b></p> <p>*Opiate rotation consists of changing one opioid for another in order to decrease the patient's pain and/or the side effects caused by the treatment.</p>                                                                                                                                                                                                                                                                                                                                                                                                                                                                                                                                                                                                                                                                                                                                                                                                                                                                                                                                                                                                                                                                                                                                              |
|                               | <p><b>References</b></p> <p>Roulet L, et al. Rotation des opioïdes : de la théorie à la pratique. Recommendations interdisciplinaires du réseau douleur des HUG. Rev Med Suisse 2011 : <a href="http://soinspalliatifs.hug-ge.ch/library/pdf/RMS_rotation_opioides_RD_2011.pdf">http://soinspalliatifs.hug-ge.ch/library/pdf/RMS_rotation_opioides_RD_2011.pdf</a></p>                                                                                                                                                                                                                                                                                                                                                                                                                                                                                                                                                                                                                                                                                                                                                                                                                                                                                                                                                         |



|  |                                   |                                                                                                                                                                                                                                                                                                                                                                                                                                                                                                                                                                                                                                                                                                                                                                                                                                                                                                                                                                                                                                                                                                                                                                                                                                                                                                                                                                                                                                                                  |                                                                                                         |
|--|-----------------------------------|------------------------------------------------------------------------------------------------------------------------------------------------------------------------------------------------------------------------------------------------------------------------------------------------------------------------------------------------------------------------------------------------------------------------------------------------------------------------------------------------------------------------------------------------------------------------------------------------------------------------------------------------------------------------------------------------------------------------------------------------------------------------------------------------------------------------------------------------------------------------------------------------------------------------------------------------------------------------------------------------------------------------------------------------------------------------------------------------------------------------------------------------------------------------------------------------------------------------------------------------------------------------------------------------------------------------------------------------------------------------------------------------------------------------------------------------------------------|---------------------------------------------------------------------------------------------------------|
|  | <b>References</b>                 | IHS 2013: The International Classification of Headache Disorders, 3rd edition. Cephalgia 2013: <a href="http://www.ihs-classification.org/downloads/mixed/International-Headache-Classification-III-ICHD-III-2013-Beta.pdf">http://www.ihs-classification.org/downloads/mixed/International-Headache-Classification-III-ICHD-III-2013-Beta.pdf</a><br>AAN/AHS 2012: Evidence based guideline update: pharmacologic treatment for episodic migraine prevention in adults: <a href="http://www.ncbi.nlm.nih.gov/pmc/articles/PMC3335452/pdf/zn11337.pdf">http://www.ncbi.nlm.nih.gov/pmc/articles/PMC3335452/pdf/zn11337.pdf</a><br>Hollande S, et al. Evidence-based guideline update: NSAIDs and other complementary treatments for episodic migraine prevention in adults. Neurology 2012: <a href="http://www.neurology.org/content/78/17/1346.full.pdf+html">http://www.neurology.org/content/78/17/1346.full.pdf+html</a><br>Antonaci F, et al. A review of current European treatment guidelines for migraine. J Headache Pain 2010: <a href="http://www.ncbi.nlm.nih.gov/pmc/articles/PMC3452183/pdf/10194_2009_Article_179.pdf">http://www.ncbi.nlm.nih.gov/pmc/articles/PMC3452183/pdf/10194_2009_Article_179.pdf</a><br>AAN/ AHS 2000. Evidence-based guideline update: pharmacologic treatment for episodic migraine prevention in adults: <a href="http://www.guideline.gov/content.aspx?id=36898">http://www.guideline.gov/content.aspx?id=36898</a> |                                                                                                         |
|  | <b>Strength of recommendation</b> | Experts median agreement: agree<br>Median usefulness rating: useful                                                                                                                                                                                                                                                                                                                                                                                                                                                                                                                                                                                                                                                                                                                                                                                                                                                                                                                                                                                                                                                                                                                                                                                                                                                                                                                                                                                              | % of experts agree or strongly agree: 97.4 %<br>% of experts rating items useful or very useful: 92.3 % |

## INFECTIOLOGY

### URINARY INFECTIONS

|             |                                   |                                                                                                                                                                                                                                                                                                                                                                                                                                                                                                                                                                                                      |                                                                                                        |
|-------------|-----------------------------------|------------------------------------------------------------------------------------------------------------------------------------------------------------------------------------------------------------------------------------------------------------------------------------------------------------------------------------------------------------------------------------------------------------------------------------------------------------------------------------------------------------------------------------------------------------------------------------------------------|--------------------------------------------------------------------------------------------------------|
| 93<br>Other | <b>Rational</b>                   | Avoid recurrences.                                                                                                                                                                                                                                                                                                                                                                                                                                                                                                                                                                                   |                                                                                                        |
|             | <b>Recommendation</b>             | *Probabilistic treatment, then adapted to the antibiotic resistance test done on fresh urine after removing or changing the catheter.                                                                                                                                                                                                                                                                                                                                                                                                                                                                |                                                                                                        |
|             | <b>References</b>                 | IDSA 2010: Diagnosis, Prevention, and Treatment of Catheter-Associated Urinary Tract Infection in Adults: <a href="http://www.idsociety.org/uploadedFiles/IDSA/Guidelines-Patient_Care/PDF_Library/Comp%20UTI.pdf">http://www.idsociety.org/uploadedFiles/IDSA/Guidelines-Patient_Care/PDF_Library/Comp%20UTI.pdf</a><br>IDSA/ ESMID 2010: International Clinical Practice Guidelines for the Treatment of Acute Uncomplicated Cystitis and Pyelonephritis in Women: <a href="http://cid.oxfordjournals.org/content/52/5/e103.full.pdf">http://cid.oxfordjournals.org/content/52/5/e103.full.pdf</a> |                                                                                                        |
|             | <b>Strength of recommendation</b> | Experts median agreement: strongly agree<br>Median usefulness rating: useful                                                                                                                                                                                                                                                                                                                                                                                                                                                                                                                         | % of experts agree or strongly agree: 100 %<br>% of experts rating items useful or very useful: 87.2 % |

### PULMONARY- and TUBERCULOSIS-RELATED INFECTIONS

|          |                                   |                                                                                                                                                                                                                                                                                                                                                                                                                                                                                                                                                                                                                                                                                                                                                                                                                                                                                                                                                                                                                                                                                                                                                                                                                                                                                                                                                                                          |                                                                                                         |
|----------|-----------------------------------|------------------------------------------------------------------------------------------------------------------------------------------------------------------------------------------------------------------------------------------------------------------------------------------------------------------------------------------------------------------------------------------------------------------------------------------------------------------------------------------------------------------------------------------------------------------------------------------------------------------------------------------------------------------------------------------------------------------------------------------------------------------------------------------------------------------------------------------------------------------------------------------------------------------------------------------------------------------------------------------------------------------------------------------------------------------------------------------------------------------------------------------------------------------------------------------------------------------------------------------------------------------------------------------------------------------------------------------------------------------------------------------|---------------------------------------------------------------------------------------------------------|
| 94<br>UP | <b>Rational</b>                   | Frequent infections that may lead to hospitalisation with a high morbidity-mortality.                                                                                                                                                                                                                                                                                                                                                                                                                                                                                                                                                                                                                                                                                                                                                                                                                                                                                                                                                                                                                                                                                                                                                                                                                                                                                                    |                                                                                                         |
|          | <b>Recommendation</b>             | *The therapeutic suggestions must be modulated based on the epidemiological context, the presence of comorbidity factors, the gravity of the pneumonia and local recommendations.                                                                                                                                                                                                                                                                                                                                                                                                                                                                                                                                                                                                                                                                                                                                                                                                                                                                                                                                                                                                                                                                                                                                                                                                        |                                                                                                         |
|          | <b>Remarks</b>                    | In case of nosocomial pulmonary infection, see local recommendations.<br>For macrolide use, see item 114 for patients with a high cardiovascular risk.                                                                                                                                                                                                                                                                                                                                                                                                                                                                                                                                                                                                                                                                                                                                                                                                                                                                                                                                                                                                                                                                                                                                                                                                                                   |                                                                                                         |
|          | <b>References</b>                 | INESSS 2010 : Pneumonie acquise en communauté chez l'adulte : <a href="http://www.inesss.qc.ca/fileadmin/doc/CDM/UsageOptimal/Guides-serieI/CdM-Antibio1-Pneumonie-Adulte-fr.pdf">http://www.inesss.qc.ca/fileadmin/doc/CDM/UsageOptimal/Guides-serieI/CdM-Antibio1-Pneumonie-Adulte-fr.pdf</a><br>BSAC 2008: Guidelines for the management of hospital-acquired pneumonia in the UK: <a href="http://jac.oxfordjournals.org/content/62/1/5.full.pdf">http://jac.oxfordjournals.org/content/62/1/5.full.pdf</a><br>SPILF 2006 : Prise en charge des infections des voies respiratoires basses de l'adulte immunocompétent : <a href="http://www.infectiologie.com/site/medias/documents/consensus/Inf_respir_court-2006.pdf">http://www.infectiologie.com/site/medias/documents/consensus/Inf_respir_court-2006.pdf</a><br>IDSA/ ATSC 2007: Management of Community-Acquired Pneumonia in Adults: <a href="http://www.thoracic.org/statements./resources/mtpi/idsaats-cap.pdf">http://www.thoracic.org/statements./resources/mtpi/idsaats-cap.pdf</a><br>Rotstein C, et al. Clinical practice guidelines for hospital-acquired pneumonia and ventilator-associated pneumonia in adults. Can J Infect Dis Med Microbiol 2008: <a href="http://www.ncbi.nlm.nih.gov/pmc/articles/PMC2610276/pdf/jidmm19019.pdf">http://www.ncbi.nlm.nih.gov/pmc/articles/PMC2610276/pdf/jidmm19019.pdf</a> |                                                                                                         |
|          | <b>Strength of recommendation</b> | Experts median agreement: agree<br>Median usefulness rating: useful                                                                                                                                                                                                                                                                                                                                                                                                                                                                                                                                                                                                                                                                                                                                                                                                                                                                                                                                                                                                                                                                                                                                                                                                                                                                                                                      | % of experts agree or strongly agree: 87.2 %<br>% of experts rating items useful or very useful: 82.1 % |

|          |                                   |                                                                                                                                                                                                                                                                                                                                                                                                                                                                                                                                                                                          |                                                                                                         |
|----------|-----------------------------------|------------------------------------------------------------------------------------------------------------------------------------------------------------------------------------------------------------------------------------------------------------------------------------------------------------------------------------------------------------------------------------------------------------------------------------------------------------------------------------------------------------------------------------------------------------------------------------------|---------------------------------------------------------------------------------------------------------|
| 95<br>UP | <b>Rational</b>                   | Risk of relapse or resistance if treatment is too short lasting.<br>Do not stop treatment without the opinion of an infectiology specialist.                                                                                                                                                                                                                                                                                                                                                                                                                                             |                                                                                                         |
|          | <b>Remark</b>                     | The duration may be discussed with an infectiology specialist.                                                                                                                                                                                                                                                                                                                                                                                                                                                                                                                           |                                                                                                         |
|          | <b>References</b>                 | Zumla A, et al. Tuberculosis. NEJM 2013 [abstract]: <a href="http://www.nejm.org/doi/full/10.1056/NEJMra1200894">http://www.nejm.org/doi/full/10.1056/NEJMra1200894</a><br>WHO 2010: Treatment of tuberculosis Guidelines Fourth edition: <a href="http://whqlibdoc.who.int/publications/2010/9789241547833_eng.pdf">http://whqlibdoc.who.int/publications/2010/9789241547833_eng.pdf</a><br>ATS/ CDC/ IDSA 2003: Treatment of Tuberculosis: <a href="http://www.thoracic.org/statements/resources/tb-opi/rr5211.pdf">http://www.thoracic.org/statements/resources/tb-opi/rr5211.pdf</a> |                                                                                                         |
|          | <b>Strength of recommendation</b> | Experts median agreement: strongly agree<br>Median usefulness rating: useful                                                                                                                                                                                                                                                                                                                                                                                                                                                                                                             | % of experts agree or strongly agree: 97.4 %<br>% of experts rating items useful or very useful: 84.6 % |

|          |                       |                                                                                                                                                                                                                 |  |
|----------|-----------------------|-----------------------------------------------------------------------------------------------------------------------------------------------------------------------------------------------------------------|--|
| 96<br>OP | <b>Rational</b>       | The toxicity of tuberculosis drugs may be added to that of other molecules.                                                                                                                                     |  |
|          | <b>Recommendation</b> | The hepatic tests must be evaluated before beginning any treatment, then regularly throughout the entire treatment (for example, possible monitoring at 15 days, 1, 2, 4 and 6 months after starting treatment) |  |
|          | <b>Useful link</b>    | *Livertox: <a href="http://livertox.nih.gov/">http://livertox.nih.gov/</a>                                                                                                                                      |  |
|          | <b>References</b>     | Doin, ed. <i>Du bon usage des antibiotiques 2012</i> . Doin ed. 2012, Wolters Kluwer France: Rueil-Malmaison. 339                                                                                               |  |

|                                  |                                   |                                                                                                                                                                                                                                                                                                                                                                                                                                                                                                                                                                                                                                                                                                                                                                                                                                                                                                                                                                                                                                                                                                                                                                       |
|----------------------------------|-----------------------------------|-----------------------------------------------------------------------------------------------------------------------------------------------------------------------------------------------------------------------------------------------------------------------------------------------------------------------------------------------------------------------------------------------------------------------------------------------------------------------------------------------------------------------------------------------------------------------------------------------------------------------------------------------------------------------------------------------------------------------------------------------------------------------------------------------------------------------------------------------------------------------------------------------------------------------------------------------------------------------------------------------------------------------------------------------------------------------------------------------------------------------------------------------------------------------|
|                                  |                                   | WHO 2010: Treatment of tuberculosis Guidelines Fourth edition:<br><a href="http://whqlibdoc.who.int/publications/2010/9789241547833_eng.pdf">http://whqlibdoc.who.int/publications/2010/9789241547833_eng.pdf</a><br>ATS 2006: Hepatotoxicity of Antituberculosis Therapy: <a href="http://www.thoracic.org/statements/resources/tb-opi/hepatotoxicity-of-antituberculosis-therapy.pdf">http://www.thoracic.org/statements/resources/tb-opi/hepatotoxicity-of-antituberculosis-therapy.pdf</a>                                                                                                                                                                                                                                                                                                                                                                                                                                                                                                                                                                                                                                                                        |
|                                  | <b>Strength of recommendation</b> | Experts median agreement: strongly agree % of experts agree or strongly agree: 100 %<br>Median usefulness rating: very useful % of experts rating items useful or very useful: 82.1 %                                                                                                                                                                                                                                                                                                                                                                                                                                                                                                                                                                                                                                                                                                                                                                                                                                                                                                                                                                                 |
| 97<br>DDI                        | <b>Rational</b>                   | Powerful enzyme inducer (in particular CYP2C8, 2C9, 2C19, 3A4 and Pgp).                                                                                                                                                                                                                                                                                                                                                                                                                                                                                                                                                                                                                                                                                                                                                                                                                                                                                                                                                                                                                                                                                               |
|                                  | <b>Recommendation</b>             | *Favour molecules eliminated by the kidneys, or adapt the doses, or in some cases replace the rifampicin with rifabutin.                                                                                                                                                                                                                                                                                                                                                                                                                                                                                                                                                                                                                                                                                                                                                                                                                                                                                                                                                                                                                                              |
|                                  | <b>Useful link</b>                | HUG 2014: Drug interactions, cytochromes P450 and P-glycoprotein (Pgp): <a href="http://www.hug-gc.ch/sites/interhug/files/structures/pharmacologie_et_toxicologie_cliniques/documents/interactions_medicamenteuses_et_cyp450.pdf">http://www.hug-gc.ch/sites/interhug/files/structures/pharmacologie_et_toxicologie_cliniques/documents/interactions_medicamenteuses_et_cyp450.pdf</a>                                                                                                                                                                                                                                                                                                                                                                                                                                                                                                                                                                                                                                                                                                                                                                               |
|                                  | <b>References</b>                 | WHO 2010: Treatment of tuberculosis Guidelines Fourth edition:<br><a href="http://whqlibdoc.who.int/publications/2010/9789241547833_eng.pdf">http://whqlibdoc.who.int/publications/2010/9789241547833_eng.pdf</a><br>CDC 2013: Managing Drug Interactions in the Treatment of HIV-Related Tuberculosis:<br><a href="http://www.cdc.gov/tb/publications/guidelines/tb_hiv_drugs/recommendations02.htm">http://www.cdc.gov/tb/publications/guidelines/tb_hiv_drugs/recommendations02.htm</a>                                                                                                                                                                                                                                                                                                                                                                                                                                                                                                                                                                                                                                                                            |
|                                  | <b>Strength of recommendation</b> | Experts median agreement: strongly agree % of experts agree or strongly agree: 100 %<br>Median usefulness rating: very useful % of experts rating items useful or very useful: 94.9 %                                                                                                                                                                                                                                                                                                                                                                                                                                                                                                                                                                                                                                                                                                                                                                                                                                                                                                                                                                                 |
| <b>ABDOMINAL INFECTIONS</b>      |                                   |                                                                                                                                                                                                                                                                                                                                                                                                                                                                                                                                                                                                                                                                                                                                                                                                                                                                                                                                                                                                                                                                                                                                                                       |
| 98<br>UP                         | <b>Rational</b>                   | Infections frequently associated with anaerobic germs.                                                                                                                                                                                                                                                                                                                                                                                                                                                                                                                                                                                                                                                                                                                                                                                                                                                                                                                                                                                                                                                                                                                |
|                                  | <b>Remarks</b>                    | Follow local recommendations for the choice of antibiotics.<br>*Examples of antibiotics covering anaerobic germs: amoxicillin-clavulanate acid, cefoxitin, doripenem, ertapenem, imipenem-cilastatin, meropenem, metronidazole, moxifloxacin, piperacillin-tazobactam, ticarcillin-clavulanic acid.                                                                                                                                                                                                                                                                                                                                                                                                                                                                                                                                                                                                                                                                                                                                                                                                                                                                   |
|                                  | <b>Reference</b>                  | SIS/ IDSA 2010: Diagnosis and Management of Complicated Intra-abdominal Infection in Adults and Children:<br><a href="http://cid.oxfordjournals.org/content/50/2/133.full.pdf">http://cid.oxfordjournals.org/content/50/2/133.full.pdf</a>                                                                                                                                                                                                                                                                                                                                                                                                                                                                                                                                                                                                                                                                                                                                                                                                                                                                                                                            |
|                                  | <b>Strength of recommendation</b> | Experts median agreement: strongly agree % of experts agree or strongly agree: 97.4 %<br>Median usefulness rating: useful % of experts rating items useful or very useful: 89.7 %                                                                                                                                                                                                                                                                                                                                                                                                                                                                                                                                                                                                                                                                                                                                                                                                                                                                                                                                                                                     |
| <b>ENDOCARDITIS</b>              |                                   |                                                                                                                                                                                                                                                                                                                                                                                                                                                                                                                                                                                                                                                                                                                                                                                                                                                                                                                                                                                                                                                                                                                                                                       |
| 99<br>OP                         | <b>Recommendation</b>             | Ensure good oral hygiene and regular dental exams in order to avoid bacterial endocarditis in the general population.                                                                                                                                                                                                                                                                                                                                                                                                                                                                                                                                                                                                                                                                                                                                                                                                                                                                                                                                                                                                                                                 |
|                                  | <b>Remarks</b>                    | * <u>Most at-risk patients</u> : those with a valvular prosthesis, history of infectious endocarditis, congenital heart pathology or heart transplant patients developing a valvulopathy.<br><br>** <u>Examples of high-risk procedures requiring preventive treatment in very high-risk patients</u> : dental procedures in the gums or apical region of the teeth or perforating the oral mucus, invasive pulmonary procedures, gastrointestinal or genitourinary surgery in case of known infection, cutaneous procedures on infected skin or musculoskeletal cutaneous procedures, heart or vascular surgery with implantation of material.<br><br>** <u>Examples of low-risk procedures for which is not necessary to begin treatment</u> : dental procedures other than those involving handling the gums, the periapical region of the teeth or perforation of the oral mucus, pulmonary procedures other than those which are invasive or seek to treat active infections, certain digestive procedures (gastroscopy, colonoscopy, transoesophageal ultrasound), certain genitourinary procedures (cytосcopy), procedures involving the skin and soft tissue. |
|                                  | <b>Reference</b>                  | ESC 2009: Infective Endocarditis (Guidelines on Prevention, Diagnosis and Treatment of):<br><a href="http://eurheartj.oxfordjournals.org/content/30/19/2369.full.pdf">http://eurheartj.oxfordjournals.org/content/30/19/2369.full.pdf</a>                                                                                                                                                                                                                                                                                                                                                                                                                                                                                                                                                                                                                                                                                                                                                                                                                                                                                                                             |
|                                  | <b>Strength of recommendation</b> | Experts median agreement: agree % of experts agree or strongly agree: 97.4 %<br>Median usefulness rating: useful % of experts rating items useful or very useful: 92.3 %                                                                                                                                                                                                                                                                                                                                                                                                                                                                                                                                                                                                                                                                                                                                                                                                                                                                                                                                                                                              |
| <b>OSTEOARTICULAR INFECTIONS</b> |                                   |                                                                                                                                                                                                                                                                                                                                                                                                                                                                                                                                                                                                                                                                                                                                                                                                                                                                                                                                                                                                                                                                                                                                                                       |
| 100<br>UP                        | <b>Rational</b>                   | Obtain sufficient concentrations in the bone to eradicate microorganisms.                                                                                                                                                                                                                                                                                                                                                                                                                                                                                                                                                                                                                                                                                                                                                                                                                                                                                                                                                                                                                                                                                             |
|                                  | <b>Recommendation</b>             | See a referring physician in infectiology. The treatment is not urgent; it should be started after identifying the germ and determining its sensitivity. It is generally a long-term treatment.                                                                                                                                                                                                                                                                                                                                                                                                                                                                                                                                                                                                                                                                                                                                                                                                                                                                                                                                                                       |
|                                  | <b>Remark</b>                     | * <u>Non-exhaustive list of antibiotics diffusing in the bone</u> : fusidic acid, 2 <sup>nd</sup> and 3 <sup>rd</sup> generation cephalosporins, daptomycin, fluoroquinolones, linezolid, rifampicin, vancomycin.                                                                                                                                                                                                                                                                                                                                                                                                                                                                                                                                                                                                                                                                                                                                                                                                                                                                                                                                                     |





|              |                                   |                                                                                                                                                                                                                                                                                                                                                                                                                                                                                                                                                                                                                                                                                                                                                                                                                                                                                                                                                                                                                                                                                                                                                                                                                                                                                                  |
|--------------|-----------------------------------|--------------------------------------------------------------------------------------------------------------------------------------------------------------------------------------------------------------------------------------------------------------------------------------------------------------------------------------------------------------------------------------------------------------------------------------------------------------------------------------------------------------------------------------------------------------------------------------------------------------------------------------------------------------------------------------------------------------------------------------------------------------------------------------------------------------------------------------------------------------------------------------------------------------------------------------------------------------------------------------------------------------------------------------------------------------------------------------------------------------------------------------------------------------------------------------------------------------------------------------------------------------------------------------------------|
|              |                                   | immunosuppressive treatment), cyclophosphamide, alemtuzumab, analogue of the purine bases (fludarabine), anti-TNF alpha combined with another immunosuppressant, cyclophosphamide, temozolomide combined with radiotherapy.<br>*Non-exhaustive list of pathologies associated with immune suppression: cancers, rheumatological pathologies (in particular Wegener's disease), malignant haemopathies treated by chemotherapy with a high occurrence of aplasia.                                                                                                                                                                                                                                                                                                                                                                                                                                                                                                                                                                                                                                                                                                                                                                                                                                 |
|              | <b>References</b>                 | NCCN 2012: Prevention and Treatment of Cancer-Related Infections: <a href="http://www.jnccn.org/content/10/11/1412.full.pdf">http://www.jnccn.org/content/10/11/1412.full.pdf</a><br>Green H, et al. Prophylaxis for Pneumocystis pneumonia (PCP) in non-HIV immunocompromised patients (Review). Cochrane Database Syst Rev 2009: <a href="http://onlinelibrary.wiley.com/doi/10.1002/14651858.CD005590.pub2/abstract;jsessionid=258A7B9B3F791B769F738289DCA2FE20.f04t04">http://onlinelibrary.wiley.com/doi/10.1002/14651858.CD005590.pub2/abstract;jsessionid=258A7B9B3F791B769F738289DCA2FE20.f04t04</a><br>EULAR 2008: recommendations for the management of primary small and medium vessel vasculitis: <a href="http://ard.bmj.com/content/68/3/310.full.pdf">http://ard.bmj.com/content/68/3/310.full.pdf</a><br>Yale SH, et al. Pneumocystis carinii pneumonia in patients without acquired immunodeficiency syndrome: associated illness and prior corticosteroid therapy. Mayo Clin Proc 1996 [abstract]: <a href="http://www.mayoclinicproceedings.org/article/S0025-6196(11)64914-8/abstract?refuid=S0025-6196(11)63174-1&amp;refissn=0025-6196">http://www.mayoclinicproceedings.org/article/S0025-6196(11)64914-8/abstract?refuid=S0025-6196(11)63174-1&amp;refissn=0025-6196</a> |
|              | <b>Strength of recommendation</b> | Experts median agreement: strongly agree % of experts agree or strongly agree: 94.9 %<br>Median usefulness rating: useful % of experts rating items useful or very useful: 87.2 %                                                                                                                                                                                                                                                                                                                                                                                                                                                                                                                                                                                                                                                                                                                                                                                                                                                                                                                                                                                                                                                                                                                |
|              | <b>Rational</b>                   | Risk of neuropsychiatric and dermatological disorders.                                                                                                                                                                                                                                                                                                                                                                                                                                                                                                                                                                                                                                                                                                                                                                                                                                                                                                                                                                                                                                                                                                                                                                                                                                           |
|              | <b>Recommendation</b>             | pyridoxine: 25–50 mg/d.                                                                                                                                                                                                                                                                                                                                                                                                                                                                                                                                                                                                                                                                                                                                                                                                                                                                                                                                                                                                                                                                                                                                                                                                                                                                          |
|              | <b>Remarks</b>                    | *Patients with a risk of vitamin B6 deficiency or peripheral neuropathy: high doses of isoniazid, pre-existing causes for peripheral nerve disease (diabetes, alcohol dependency, renal failure, haemodialysis, tobacco use, HIV infection, taking neurotoxic drugs, malnutrition, pregnancy, nursing, chronic hepatopathy, elderly patients, use of oral contraceptives.<br>A vitamin B6 overdose may itself cause neuropathy.                                                                                                                                                                                                                                                                                                                                                                                                                                                                                                                                                                                                                                                                                                                                                                                                                                                                  |
|              | <b>Reference</b>                  | ATS/ CDC/ IDSA 2003: Treatment of Tuberculosis: <a href="http://www.atsjournals.org/doi/pdf/10.1164/rccm.167.4.603">http://www.atsjournals.org/doi/pdf/10.1164/rccm.167.4.603</a>                                                                                                                                                                                                                                                                                                                                                                                                                                                                                                                                                                                                                                                                                                                                                                                                                                                                                                                                                                                                                                                                                                                |
|              | <b>Strength of recommendation</b> | Experts median agreement: strongly agree % of experts agree or strongly agree: 94.9 %<br>Median usefulness rating: useful % of experts rating items useful or very useful: 89.7 %                                                                                                                                                                                                                                                                                                                                                                                                                                                                                                                                                                                                                                                                                                                                                                                                                                                                                                                                                                                                                                                                                                                |
|              | <b>PROPER USE OF ANTIBIOTICS</b>  |                                                                                                                                                                                                                                                                                                                                                                                                                                                                                                                                                                                                                                                                                                                                                                                                                                                                                                                                                                                                                                                                                                                                                                                                                                                                                                  |
|              | <b>Rational</b>                   | Make it possible to adapt the selection pressure and to avoid resistance.                                                                                                                                                                                                                                                                                                                                                                                                                                                                                                                                                                                                                                                                                                                                                                                                                                                                                                                                                                                                                                                                                                                                                                                                                        |
|              | <b>Recommendation</b>             | Adaptation of the drug to the sensitivity of the bacterial strain, de-escalation of therapy.                                                                                                                                                                                                                                                                                                                                                                                                                                                                                                                                                                                                                                                                                                                                                                                                                                                                                                                                                                                                                                                                                                                                                                                                     |
|              | <b>References</b>                 | Manuel O, et al. Impact of standardised review of intravenous antibiotic therapy 72 hours after prescription in two internal medicine wards. J Hosp Infect 2010 [abstract]: <a href="http://www.journalofhospitalinfection.com/article/S0195-6701(09)00318-1/abstract">http://www.journalofhospitalinfection.com/article/S0195-6701(09)00318-1/abstract</a><br>HAS 2008: Antibiotic therapy and prevention of bacterial resistance in healthcare organisations: <a href="http://www.has-sante.fr/portail/upload/docs/application/pdf/2010-03/antibiotic_therapy_and_prevention_of_bacterial_resistance_-_guidelines.pdf">http://www.has-sante.fr/portail/upload/docs/application/pdf/2010-03/antibiotic_therapy_and_prevention_of_bacterial_resistance_-_guidelines.pdf</a>                                                                                                                                                                                                                                                                                                                                                                                                                                                                                                                      |
|              | <b>Strength of recommendation</b> | Experts median agreement: strongly agree % of experts agree or strongly agree: 94.9 %<br>Median usefulness rating: very useful % of experts rating items useful or very useful: 100 %                                                                                                                                                                                                                                                                                                                                                                                                                                                                                                                                                                                                                                                                                                                                                                                                                                                                                                                                                                                                                                                                                                            |
|              | <b>Rational</b>                   | Decreased complications (infectious, thrombophlebitis, pain), ease of administration, improvement of patient comfort, lower cost, comparable efficacy and decreased hospital stay.                                                                                                                                                                                                                                                                                                                                                                                                                                                                                                                                                                                                                                                                                                                                                                                                                                                                                                                                                                                                                                                                                                               |
|              | <b>Recommendation</b>             | Adaptation of the treatment to the sensitivity of the bacterial strain, using an antibiotic having good oral bioavailability*.                                                                                                                                                                                                                                                                                                                                                                                                                                                                                                                                                                                                                                                                                                                                                                                                                                                                                                                                                                                                                                                                                                                                                                   |
|              | <b>Remarks</b>                    | IV-per os switch criteria: patient showing clinical improvement, stable haemodynamics, with no sign of malabsorption (functional gastrointestinal tract) and leukopaenia. Antibiotic having good bioavailability and good oral tolerance, respecting the rules of bioequivalence with the antibiotic taken by IV and for which the dosing regimen is identical or simplified.<br>*Non-exhaustive list of antibiotics with good oral bioavailability: $\beta$ -lactamines, fluoroquinolones, linezolid, macrolides, clindamycin, metronidazole, trimethoprim-sulfamethoxazole, rifampicin.                                                                                                                                                                                                                                                                                                                                                                                                                                                                                                                                                                                                                                                                                                        |
|              | <b>References</b>                 | Owens R, et al. Antimicrobial stewardship: concepts and strategies in the 21st century. Diagnostic Microbiology and Infectious Disease 2008 [abstract]: <a href="http://www.dmidjournal.com/article/S0732-8893(08)00148-X/abstract">http://www.dmidjournal.com/article/S0732-8893(08)00148-X/abstract</a><br>Pablos A, et al. Evaluation of an antibiotic intravenous to oral sequential therapy program. Pharmacoepidemiol Drug Saf 2005 [abstract]: <a href="http://onlinelibrary.wiley.com/doi/10.1002/pds.1042/abstract">http://onlinelibrary.wiley.com/doi/10.1002/pds.1042/abstract</a>                                                                                                                                                                                                                                                                                                                                                                                                                                                                                                                                                                                                                                                                                                    |
|              | <b>Strength of</b>                | Experts median agreement: strongly agree % of experts agree or strongly agree: 100 %                                                                                                                                                                                                                                                                                                                                                                                                                                                                                                                                                                                                                                                                                                                                                                                                                                                                                                                                                                                                                                                                                                                                                                                                             |
| 109<br>UP    |                                   |                                                                                                                                                                                                                                                                                                                                                                                                                                                                                                                                                                                                                                                                                                                                                                                                                                                                                                                                                                                                                                                                                                                                                                                                                                                                                                  |
| 110<br>Other |                                   |                                                                                                                                                                                                                                                                                                                                                                                                                                                                                                                                                                                                                                                                                                                                                                                                                                                                                                                                                                                                                                                                                                                                                                                                                                                                                                  |
| 111<br>Other |                                   |                                                                                                                                                                                                                                                                                                                                                                                                                                                                                                                                                                                                                                                                                                                                                                                                                                                                                                                                                                                                                                                                                                                                                                                                                                                                                                  |

|              |                                   |                                                                                                                                                                                                                                                                                                                                                                                                                                                                                                                                                                                                                                                                                                                                                                                                                                                            |                                                                                                         |
|--------------|-----------------------------------|------------------------------------------------------------------------------------------------------------------------------------------------------------------------------------------------------------------------------------------------------------------------------------------------------------------------------------------------------------------------------------------------------------------------------------------------------------------------------------------------------------------------------------------------------------------------------------------------------------------------------------------------------------------------------------------------------------------------------------------------------------------------------------------------------------------------------------------------------------|---------------------------------------------------------------------------------------------------------|
|              | <b>recommendation</b>             | Median usefulness rating: very useful                                                                                                                                                                                                                                                                                                                                                                                                                                                                                                                                                                                                                                                                                                                                                                                                                      | % of experts rating items useful or very useful: 94.9 %                                                 |
| 112<br>OP    | <b>Rational</b>                   | Decreased needless exposure to antibiotics.                                                                                                                                                                                                                                                                                                                                                                                                                                                                                                                                                                                                                                                                                                                                                                                                                |                                                                                                         |
|              | <b>Remark</b>                     | * <u>Non-exhaustive list of infections for which an antibiotic therapy duration exceeding 10 days is recommended</u> : prostatitis, osteoarticular infections, endocarditis, tuberculosis, pyelonephritis, some pneumopathies, late ventilator-associated pneumonia with <i>Pseudomonas aeruginosa</i> or Acinetobacter, pulmonary abscess, empyema, deep cutaneous infections, some bacterial meningitis ( <i>Streptococcus agalactiae</i> , Gram-negative bacillus, <i>Listeria monocytogenes</i> ), bacteraemia related to intravascular catheters with <i>Staphylococcus aureus</i> or <i>Staphylococcus lugdunensis</i> , etc.                                                                                                                                                                                                                        |                                                                                                         |
|              | <b>References</b>                 | Hayashi Y, et al. Strategies for Reduction in Duration of Antibiotic Use in Hospitalized Patients. Clinical Infectious Diseases 2011: <a href="http://cid.oxfordjournals.org/content/52/10/1232.full.pdf">http://cid.oxfordjournals.org/content/52/10/1232.full.pdf</a><br>Pugh R, et al. Short-course versus prolonged-course antibiotic therapy for hospital-acquired pneumonia in critically ill adults (Review). The Cochrane Library 2011. [Abstract]: <a href="http://onlinelibrary.wiley.com/doi/10.1002/14651858.CD007577.pub2/abstract">http://onlinelibrary.wiley.com/doi/10.1002/14651858.CD007577.pub2/abstract</a>                                                                                                                                                                                                                            |                                                                                                         |
|              | <b>Strength of recommendation</b> | Experts median agreement: strongly agree<br>Median usefulness rating: very useful                                                                                                                                                                                                                                                                                                                                                                                                                                                                                                                                                                                                                                                                                                                                                                          | % of experts agree or strongly agree: 97.4 %<br>% of experts rating items useful or very useful: 97.4 % |
| 113<br>Other | <b>Rational</b>                   | Allow to avoid side effects and therapeutic escapes.                                                                                                                                                                                                                                                                                                                                                                                                                                                                                                                                                                                                                                                                                                                                                                                                       |                                                                                                         |
|              | <b>Remarks</b>                    | * <u>Non-exhaustive list of antibiotics having a risk of dose-dependent toxicity</u> : aminoglycosides (treatment > 3 days or high cumulative doses), vancomycin.<br>** <u>Non-exhaustive list of situations creating a risk of modification of drug plasma concentrations</u> : renal failure, pregnancy, severe sepsis, obesity/cachexia.                                                                                                                                                                                                                                                                                                                                                                                                                                                                                                                |                                                                                                         |
|              | <b>References</b>                 | Hites M, et al. Case-Control Study of Drug Monitoring of Beta-Lactams in Obese Critically Ill Patients. Antimicrob. Agents Chemother 2013: <a href="http://www.ncbi.nlm.nih.gov/pmc/articles/PMC3553684/pdf/zac708.pdf">http://www.ncbi.nlm.nih.gov/pmc/articles/PMC3553684/pdf/zac708.pdf</a><br>IDSA/ ASHSP/ SIDP 2009: Vancomycin Therapeutic Guidelines: A Summary of Consensus Recommendations: <a href="http://cid.oxfordjournals.org/content/49/3/325.full.pdf">http://cid.oxfordjournals.org/content/49/3/325.full.pdf</a><br>Eyler R, et al. Antibiotic Pharmacokinetic and Pharmacodynamic Considerations in Patients With Kidney Disease. Advances in Chronic Kidney Disease 2010 [abstract]: <a href="http://www.ackdjournal.org/article/S1548-5595(10)00084-4/abstract">http://www.ackdjournal.org/article/S1548-5595(10)00084-4/abstract</a> |                                                                                                         |
|              | <b>Strength of recommendation</b> | Experts median agreement: strongly agree<br>Median usefulness rating: useful                                                                                                                                                                                                                                                                                                                                                                                                                                                                                                                                                                                                                                                                                                                                                                               | % of experts agree or strongly agree: 97.4 %<br>% of experts rating items useful or very useful: 92.3 % |
| 114<br>DDI   | <b>Rational</b>                   | Drugs with pro-arrhythmogenic effects (elongation of the QT interval, ventricular arrhythmia) and with a risk of cardiovascular death.                                                                                                                                                                                                                                                                                                                                                                                                                                                                                                                                                                                                                                                                                                                     |                                                                                                         |
|              | <b>Remark</b>                     | * <u>Non-exhaustive list of patients with special risk</u> : known elongation of the QT interval, congenital long QT syndrome, taking drugs known to elongate the QT interval**, history of torsade de pointes, non-compensated heart failure, uncorrected hypokalaemia or hypomagnesaemia, clinically significant bradycardia, taking class Ia or class III antiarrhythmics.                                                                                                                                                                                                                                                                                                                                                                                                                                                                              |                                                                                                         |
|              | <b>Useful link</b>                | **Crediblemeds.org: List - All QTDrugs: <a href="http://www.crediblemeds.org/everyone/composite-list-all-qt drugs/?rf=All">http://www.crediblemeds.org/everyone/composite-list-all-qt drugs/?rf=All</a>                                                                                                                                                                                                                                                                                                                                                                                                                                                                                                                                                                                                                                                    |                                                                                                         |
|              | <b>References</b>                 | Ray WA, et al. Azithromycin and the Risk of Cardiovascular Death. N Engl J Med 2012: <a href="http://www.nejm.org/doi/pdf/10.1056/NEJMoa1003833">http://www.nejm.org/doi/pdf/10.1056/NEJMoa1003833</a><br>FDA Drug Safety Communication 2013: Azithromycin (Zithromax or Zmax) and the risk of potentially fatal heart rhythms: <a href="http://www.fda.gov/downloads/Drugs/DrugSafety/UCM343347.pdf">http://www.fda.gov/downloads/Drugs/DrugSafety/UCM343347.pdf</a>                                                                                                                                                                                                                                                                                                                                                                                      |                                                                                                         |
|              | <b>Strength of recommendation</b> | Experts median agreement: agree<br>Median usefulness rating: useful                                                                                                                                                                                                                                                                                                                                                                                                                                                                                                                                                                                                                                                                                                                                                                                        | % of experts agree or strongly agree: 89.7 %<br>% of experts rating items useful or very useful: 87.2 % |
| 115<br>Other | <b>Rational</b>                   | Rapid bactericidal activity, concentration-dependent, prolonged post-antibiotic effect.<br>Increased toxicity for treatment durations longer than 5-7 days (primarily renal, auditory and vestibular).<br>Narrow therapeutic window.                                                                                                                                                                                                                                                                                                                                                                                                                                                                                                                                                                                                                       |                                                                                                         |
|              | <b>Recommendations</b>            | Monitor the aminoglycoside residual concentration for treatments longer than 5 days (dosing to be done after 48 hours of treatment) or in case of renal insufficiency.<br>Monitoring to be repeated 2 times per week, associated with monitoring of renal function.<br>Adapt administration regimen based on the results of the monitoring.                                                                                                                                                                                                                                                                                                                                                                                                                                                                                                                |                                                                                                         |
|              | <b>Remarks</b>                    | In case of pre-existing renal failure, aminoglycosides will only be used if they are absolutely necessary. If use is necessary, a therapeutic drug concentration monitoring (peak and residual) will be done to adjust the dosing modes and intervals between each injection.<br>Short-term treatments will be favoured (as a general rule: 1 or 2 injections) and regular                                                                                                                                                                                                                                                                                                                                                                                                                                                                                 |                                                                                                         |

monitoring of renal and auditory function will be done.  
 \*Special situation under which administration multiple times a day is traditionally used: endocarditis (except endocarditis with streptococcus and enterococcus for which a single daily administration is recommended or possible, respectively).

**Reference** AFSSAPS/SPILF/GPIP 2011 : Mise au point sur le bon usage des aminosides administrés par voie injectable : [http://www.infectiologie.com/site/medias/documents/consensus/2011-afssaps\\_SPILF-MAP\\_Aminosides\\_Argumentaire.pdf](http://www.infectiologie.com/site/medias/documents/consensus/2011-afssaps_SPILF-MAP_Aminosides_Argumentaire.pdf)

**Strength of recommendation** Experts median agreement: agree % of experts agree or strongly agree: 89.7 %  
 Median usefulness rating: useful % of experts rating items useful or very useful: 89.7 %

**ENDOCRINOLOGY**  
**DIABETES MELLITUS (DM)**

**Rational** Prevention of microvascular complications and cardiovascular disease.

**Recommendations** Combination individualized on a case-by-case basis.  
 Metformin as 1<sup>st</sup> line treatment in T2DM.

\*Recommended HbA1c targets:  
HbA1c ≤ 6.5%: in newly diagnosed patients, whose life expectancy is > 15 years and with no cardiovascular history (with no history of major hypoglycaemia), in diabetic patients who are pregnant or plan to become pregnant.  
HbA1c ≤ 7%: in most adult diabetic patients, patients with moderate chronic renal failure (stage 3: CrCl between 30 and 59 ml/min/1.73 m<sup>2</sup>), in elderly patients whose life expectancy is deemed satisfactory.  
HbA1c ≤ 8%: in patients with proven serious comorbidity and/or a limited life expectancy (< 5 years), or with evolved macrovascular complications, or having a long evolution duration of diabetes (> 10 years) and for whom the 7% target is difficult to achieve because drug intensification causes severe hypoglycaemia, in patients with severe or terminal chronic renal failure (stages 4–5: CrCl < 30 mL/min/1.73 m<sup>2</sup>), and fragile elderly patients (intermediate health condition and at risk for switching patient categories).  
HbA1c < 9%: in dependent elderly patients, in poor health due to evolved chronic poly-pathology creating handicaps and social isolation.

**References** HAS 2014 : Stratégie médicamenteuse du contrôle glycémique du diabète de type 2 : [http://www.has-sante.fr/portail/upload/docs/application/pdf/2013-02/10irp04\\_synth\\_diabete\\_type\\_2\\_objectif\\_glycemique\\_messages\\_cles.pdf](http://www.has-sante.fr/portail/upload/docs/application/pdf/2013-02/10irp04_synth_diabete_type_2_objectif_glycemique_messages_cles.pdf)  
 ADA 2013: Standards of Medical Care in Diabetes: [http://care.diabetesjournals.org/content/36/Supplement\\_1/S11.full.pdf](http://care.diabetesjournals.org/content/36/Supplement_1/S11.full.pdf)  
 ESC/ EASD 2013: Diabetes, Pre-Diabetes and Cardiovascular Diseases developed with the EASD: <http://eurheartj.oxfordjournals.org/content/34/39/3035.full.pdf>

**Strength of recommendation** Experts median agreement: strongly agree % of experts agree or strongly agree: 94.9 %  
 Median usefulness rating: useful % of experts rating items useful or very useful: 92.3 %

**Rational** Prevention of hypo and hyperglycaemia.

**Recommendation** \*Customized glycaemic monitoring according to diabetologist opinion.

**Remarks** \*\*Non-exhaustive list of hyperglycaemic drugs: anticalcineurines (cyclosporine, tacrolimus), some antihypertensives (thiazidic diuretics, diazoxide, non-cardioselective beta-blockers), antipsychotics, some ARVs, β2-agonists, corticosteroids, alpha interferon, oestrogenestatives, pentamidine.  
Non-exhaustive list of hypoglycaemic drugs: NSAIDs, class 1a antiarrhythmics, beta blockers, fluoxetine, fluoroquinolones, ACEI, sulfamethoxazole-trimethoprim.

**References** Sattar N, et al. Statins and risk of incident diabetes: a collaborative meta-analysis of randomised statin trials. Lancet 2010 [abstract]: <http://www.ncbi.nlm.nih.gov/pubmed/20167359>  
 Hassan Murad M, et al. Drug-Induced Hypoglycemia: A Systematic Review. J Clin Endocrinol Metab 2009: <http://press.endocrine.org/doi/pdf/10.1210/jc.2008-1416>  
 F. Bosquet, et al. Effets endocriniens et métaboliques iatrogènes des médicaments. EMC - AKOS (Traité de Médecine) 2008 [abstract]: <http://www.em-consulte.com/en/article/178169>

**Strength of recommendation** Experts median agreement: agree % of experts agree or strongly agree: 84.6 %  
 Median usefulness rating: useful % of experts rating items useful or very useful: 74.4 %

**Rational** Possible induction of hyperglycaemia and glucose intolerance, which would destabilize treatment.

**Remark** Reducing doses of corticosteroids or stopping treatment generally allow normalizing

116  
UP

117  
OP

118  
Other

|              |                                   |                                                                                                                                                                                                                                                                                                                                                                                                                                                                                                                                                                                                                                                        |
|--------------|-----------------------------------|--------------------------------------------------------------------------------------------------------------------------------------------------------------------------------------------------------------------------------------------------------------------------------------------------------------------------------------------------------------------------------------------------------------------------------------------------------------------------------------------------------------------------------------------------------------------------------------------------------------------------------------------------------|
|              |                                   | glycaemia.                                                                                                                                                                                                                                                                                                                                                                                                                                                                                                                                                                                                                                             |
|              | <b>Reference</b>                  | Moghadam-Kia S, et al. Prevention and treatment of systemic glucocorticoid side effects. International Journal of Dermatology 2010: <a href="http://onlinelibrary.wiley.com/doi/10.1111/j.1365-4632.2009.04322.x/pdf">http://onlinelibrary.wiley.com/doi/10.1111/j.1365-4632.2009.04322.x/pdf</a>                                                                                                                                                                                                                                                                                                                                                      |
|              | <b>Strength of recommendation</b> | Experts median agreement: agree % of experts agree or strongly agree: 97.4 %<br>Median usefulness rating: useful % of experts rating items useful or very useful: 92.3 %                                                                                                                                                                                                                                                                                                                                                                                                                                                                               |
| 119<br>Other | <b>Rational</b>                   | Nephroprotective effect of ACEI and ARB. Many clinical trials conducted for this indication.                                                                                                                                                                                                                                                                                                                                                                                                                                                                                                                                                           |
|              | <b>Recommendation</b>             | Blood pressure objective < 140/90 or 85 mmHg.                                                                                                                                                                                                                                                                                                                                                                                                                                                                                                                                                                                                          |
|              | <b>Remark</b>                     | *microalbuminuria: urinary albumin = 30 to 300 mg/ 24 hours.                                                                                                                                                                                                                                                                                                                                                                                                                                                                                                                                                                                           |
|              | <b>References</b>                 | ESH/ESC 2013: Arterial Hypertension (Management of): <a href="http://eurheartj.oxfordjournals.org/content/34/28/2159.full.pdf">http://eurheartj.oxfordjournals.org/content/34/28/2159.full.pdf</a><br>ADA 2013: Standards of Medical Care in Diabetes: <a href="http://care.diabetesjournals.org/content/36/Supplement_1/S11.full.pdf">http://care.diabetesjournals.org/content/36/Supplement_1/S11.full.pdf</a>                                                                                                                                                                                                                                       |
|              | <b>Strength of recommendation</b> | Experts median agreement: strongly agree % of experts agree or strongly agree: 97.4 %<br>Median usefulness rating: very useful % of experts rating items useful or very useful: 94.9 %                                                                                                                                                                                                                                                                                                                                                                                                                                                                 |
| 120<br>UP    | <b>Rational</b>                   | Prevention of cardiovascular diseases.                                                                                                                                                                                                                                                                                                                                                                                                                                                                                                                                                                                                                 |
|              | <b>Recommendations</b>            | <u>Therapeutic goals:</u><br>*T1DM or T2DM patient with very high cardiovascular risk** (e.g.: diabet mellitus combined with a cardiovascular disease, severe CKD or one or more cardiovascular risk factors and/or organ impairment): LDL-c level < 1.8 mmol/l (< 70 mg/dL) or a reduction greater than or equal to 50% of the initial LDL-c level.<br><u>T2DM patient with high cardiovascular risk**:</u> LDLc level < 2.5 mmol/L (< 100 mg/dL).<br><u>T1DM patient with a high cardiovascular risk**:</u> possible prescription of statins regardless of basal LDL-c level.                                                                        |
|              | <b>Remark</b>                     | ** <u>Calculation of cardiovascular risk:</u> see item no. 5.                                                                                                                                                                                                                                                                                                                                                                                                                                                                                                                                                                                          |
|              | <b>References</b>                 | ESC/ EASD 2013: Diabetes, Pre-Diabetes and Cardiovascular Diseases developed with the EASD: <a href="http://eurheartj.oxfordjournals.org/content/34/39/3035.full.pdf">http://eurheartj.oxfordjournals.org/content/34/39/3035.full.pdf</a><br>ADA 2013: Standards of Medical Care in Diabetes: <a href="http://care.diabetesjournals.org/content/36/Supplement_1/S11.full.pdf">http://care.diabetesjournals.org/content/36/Supplement_1/S11.full.pdf</a>                                                                                                                                                                                                |
|              | <b>Strength of recommendation</b> | Experts median agreement: strongly agree % of experts agree or strongly agree: 100 %<br>Median usefulness rating: very useful % of experts rating items useful or very useful: 97.4 %                                                                                                                                                                                                                                                                                                                                                                                                                                                                  |
| 121<br>UP    | <b>Rational</b>                   | Primary prevention of possible cardiovascular diseases. Secondary prevention of cardiovascular diseases necessary in this population.                                                                                                                                                                                                                                                                                                                                                                                                                                                                                                                  |
|              | <b>Recommendations</b>            | *Aspirin: 75 to 160 mg QD +/- combined, for one year, with a P2Y12 receptor antagonist (clopidogrel, prasugrel, ticagrelor) in case of acute coronary syndrome.<br><u>Alternative in case of aspirin intolerance:</u> clopidogrel.<br>Take contraindications for antiplatelet drugs into account.                                                                                                                                                                                                                                                                                                                                                      |
|              | <b>Remark</b>                     | ** <u>Calculation of cardiovascular risk:</u> see item no. 5.                                                                                                                                                                                                                                                                                                                                                                                                                                                                                                                                                                                          |
|              | <b>References</b>                 | ESC/ EASD 2013: Diabetes, Pre-Diabetes and Cardiovascular Diseases developed with the EASD: <a href="http://eurheartj.oxfordjournals.org/content/34/39/3035.full.pdf">http://eurheartj.oxfordjournals.org/content/34/39/3035.full.pdf</a><br>ADA 2013: Standards of Medical Care in Diabetes: <a href="http://care.diabetesjournals.org/content/36/Supplement_1/S11.full.pdf">http://care.diabetesjournals.org/content/36/Supplement_1/S11.full.pdf</a><br>ESC/EAS 2011: Dyslipidaemias (Management of): <a href="http://eurheartj.oxfordjournals.org/content/32/14/1769.full.pdf">http://eurheartj.oxfordjournals.org/content/32/14/1769.full.pdf</a> |
|              | <b>Strength of recommendation</b> | Experts median agreement: agree % of experts agree or strongly agree: 84.6 %<br>Median usefulness rating: useful % of experts rating items useful or very useful: 89.7 %                                                                                                                                                                                                                                                                                                                                                                                                                                                                               |
| 122<br>UP    | <b>Rational</b>                   | Allow to avoid side effects of T2DM.<br>Recommended as 1 <sup>st</sup> line treatment, in particular in case of excess weight or obesity, if there is no contraindication.                                                                                                                                                                                                                                                                                                                                                                                                                                                                             |
|              | <b>References</b>                 | ESC/ EASD 2013: Diabetes, Pre-Diabetes and Cardiovascular Diseases developed with the EASD: <a href="http://eurheartj.oxfordjournals.org/content/34/39/3035.full.pdf">http://eurheartj.oxfordjournals.org/content/34/39/3035.full.pdf</a><br>ADA 2013: Standards of Medical Care in Diabetes: <a href="http://care.diabetesjournals.org/content/36/Supplement_1/S11.full.pdf">http://care.diabetesjournals.org/content/36/Supplement_1/S11.full.pdf</a>                                                                                                                                                                                                |
|              | <b>Strength of recommendation</b> | Experts median agreement: strongly agree % of experts agree or strongly agree: 97.4 %<br>Median usefulness rating: indispensable % of experts rating items useful or very useful: 100 %                                                                                                                                                                                                                                                                                                                                                                                                                                                                |
| 123<br>OP    | <b>Rational</b>                   | Risk of lactic acidosis.                                                                                                                                                                                                                                                                                                                                                                                                                                                                                                                                                                                                                               |
|              | <b>Recommendations</b>            | Favour insulin treatment during instability.<br>Stopping possible and recommended 48 hours before an at-risk procedure. Resume                                                                                                                                                                                                                                                                                                                                                                                                                                                                                                                         |

|                          |                                   |                                                                                                                                                                                                                                                                                                                                                                                                                                                                                                                                                                                   |
|--------------------------|-----------------------------------|-----------------------------------------------------------------------------------------------------------------------------------------------------------------------------------------------------------------------------------------------------------------------------------------------------------------------------------------------------------------------------------------------------------------------------------------------------------------------------------------------------------------------------------------------------------------------------------|
|                          |                                   | administration 48 hours after the procedure.                                                                                                                                                                                                                                                                                                                                                                                                                                                                                                                                      |
|                          | <b>Remark</b>                     | It is not necessary to suspend the administration of metformin in all patients. In some cases, close monitoring of renal function after the procedure is sufficient. Metformin should be suspended if renal function deteriorates and until it returns to its initial level.                                                                                                                                                                                                                                                                                                      |
|                          | <b>References</b>                 | ESC/ EASD 2013: Diabetes, Pre-Diabetes and Cardiovascular Diseases developed with the EASD:<br><a href="http://eurheartj.oxfordjournals.org/content/34/39/3035.full.pdf">http://eurheartj.oxfordjournals.org/content/34/39/3035.full.pdf</a><br>ADA 2013: Standards of Medical Care in Diabetes:<br><a href="http://care.diabetesjournals.org/content/36/Supplement_1/S11.full.pdf">http://care.diabetesjournals.org/content/36/Supplement_1/S11.full.pdf</a>                                                                                                                     |
|                          | <b>Strength of recommendation</b> | Experts median agreement: agree % of experts agree or strongly agree: 89.7 %<br>Median usefulness rating: useful % of experts rating items useful or very useful: 89.7 %                                                                                                                                                                                                                                                                                                                                                                                                          |
| 124<br>Other             | <b>Rational</b>                   | Most at risk antidiabetics for hypoglycaemia.                                                                                                                                                                                                                                                                                                                                                                                                                                                                                                                                     |
|                          | <b>Remarks</b>                    | * <u>Non-exhaustive list of sulfonylurea molecules</u> : chlorpropamide, glibenclamide/glyburide, gliclazide, glimepiride, glipizide, gliquidone, tolbutamide, tolazamide.<br>Taking beta-blockers concomitantly may hide the signs of hypoglycaemia.                                                                                                                                                                                                                                                                                                                             |
|                          | <b>Reference</b>                  | ADA 2013: Standards of Medical Care in Diabetes:<br><a href="http://care.diabetesjournals.org/content/36/Supplement_1/S11.full.pdf">http://care.diabetesjournals.org/content/36/Supplement_1/S11.full.pdf</a>                                                                                                                                                                                                                                                                                                                                                                     |
|                          | <b>Strength of recommendation</b> | Experts median agreement: strongly agree % of experts agree or strongly agree: 92.3 %<br>Median usefulness rating: useful % of experts rating items useful or very useful: 84.6 %                                                                                                                                                                                                                                                                                                                                                                                                 |
| 125<br>Other             | <b>Rational</b>                   | Risks of side effects and complications increased in these patients.                                                                                                                                                                                                                                                                                                                                                                                                                                                                                                              |
|                          | <b>Remark</b>                     | * <u>Non-exhaustive list of molecules and classes to be adapted or changed</u> : gliptin, long-acting insulin, metformin, sulfonylurea.                                                                                                                                                                                                                                                                                                                                                                                                                                           |
|                          | <b>References</b>                 | ADA/ endocrine Society 2013: Hypoglycemia and Diabetes:<br><a href="http://care.diabetesjournals.org/content/36/5/1384.full.pdf">http://care.diabetesjournals.org/content/36/5/1384.full.pdf</a><br>ADA/ EASD 2012: Management of Hyperglycemia in Type 2 Diabetes: A Patient-Centered Approach:<br><a href="http://care.diabetesjournals.org/content/35/6/1364.full.pdf">http://care.diabetesjournals.org/content/35/6/1364.full.pdf</a>                                                                                                                                         |
|                          | <b>Strength of recommendation</b> | Experts median agreement: strongly agree % of experts agree or strongly agree: 100 %<br>Median usefulness rating: very useful % of experts rating items useful or very useful: 94.8 %                                                                                                                                                                                                                                                                                                                                                                                             |
| <b>THYROID DISORDERS</b> |                                   |                                                                                                                                                                                                                                                                                                                                                                                                                                                                                                                                                                                   |
| 126<br>Other             | <b>Rational</b>                   | The TSH concentration is balanced after approximately 6 weeks of treatment.<br>In some specific cases, an earlier assay of the TSH may be useful (very high or very low TSH, myxoedematous coma, etc.).<br>Subtle differences may persist in bioavailability between the formulations of levothyroxine.                                                                                                                                                                                                                                                                           |
|                          | <b>Recommendations</b>            | The dose is adapted to the weight and to the TSH target.<br>When possible, keep the same formulation.                                                                                                                                                                                                                                                                                                                                                                                                                                                                             |
|                          | <b>Reference</b>                  | ATA/ endocrine society/ AACE 2004: Joint Statement on the U.S. Food and Drug Administration's Decision Regarding Bioequivalence of Levothyroxine Sodium:<br><a href="https://www.endocrine.org/~media/endosociety/Files/Advocacy%20and%20Outreach/Position%20Statements/Other%20Statements/Joint_Statement_LevothyroxineThyroxine.pdf">https://www.endocrine.org/~media/endosociety/Files/Advocacy%20and%20Outreach/Position%20Statements/Other%20Statements/Joint_Statement_LevothyroxineThyroxine.pdf</a>                                                                       |
|                          | <b>Strength of recommendation</b> | Experts median agreement: strongly agree % of experts agree or strongly agree: 100 %<br>Median usefulness rating: useful % of experts rating items useful or very useful: 94.6 %                                                                                                                                                                                                                                                                                                                                                                                                  |
| 127<br>Other             | <b>Rational</b>                   | Taking on an empty stomach ensures more stable T4 and TSH serum concentrations.                                                                                                                                                                                                                                                                                                                                                                                                                                                                                                   |
|                          | <b>Recommendation</b>             | When possible, keep the same formulation and same administration methods as usual.                                                                                                                                                                                                                                                                                                                                                                                                                                                                                                |
|                          | <b>Remarks</b>                    | *On an empty stomach in the morning = at least 30 minutes before breakfast, or optionally in the evening before going to bed = at least 2 hours after the evening meal.<br><br>** <u>Non-exhaustive list of substances that may decrease the absorption of levothyroxine</u> : antacids containing aluminium hydroxide, caffeine/theine, biliary acid chelators, phosphorus chelators, PPIs, food, sucralfate, calcium salts, iron sulphate.                                                                                                                                      |
|                          | <b>References</b>                 | Bach-Huynh TG, et al. Timing of Levothyroxine Administration Affects Serum Thyrotropin Concentration. JCEM 2009: <a href="http://www.ncbi.nlm.nih.gov/pmc/articles/PMC2758731/?report=printable">http://www.ncbi.nlm.nih.gov/pmc/articles/PMC2758731/?report=printable</a><br>Liwanpo L, et al. Conditions and drugs interfering with thyroxine absorption. Best Practice & Research Clinical Endocrinology & Metabolism 2009 [abstract]: <a href="http://www.bprcem.com/article/S1521-690X(09)00076-1/abstract">http://www.bprcem.com/article/S1521-690X(09)00076-1/abstract</a> |
|                          | <b>Strength of recommendation</b> | Experts median agreement: strongly agree % of experts agree or strongly agree: 92.3 %<br>Median usefulness rating: useful % of experts rating items useful or very useful: 84.6 %                                                                                                                                                                                                                                                                                                                                                                                                 |
| 128<br>OP                | <b>Rational</b>                   | Long half-life of levothyroxine (approximately 7 days) and oral absorption = approximately 80% of the dose.                                                                                                                                                                                                                                                                                                                                                                                                                                                                       |

|                      |                                   |                                                                                                                                                                                                                                                                                                                                                                                                                                                                                                                                                                                                                                                                                                                                                                                                                       |                                                                                                         |
|----------------------|-----------------------------------|-----------------------------------------------------------------------------------------------------------------------------------------------------------------------------------------------------------------------------------------------------------------------------------------------------------------------------------------------------------------------------------------------------------------------------------------------------------------------------------------------------------------------------------------------------------------------------------------------------------------------------------------------------------------------------------------------------------------------------------------------------------------------------------------------------------------------|---------------------------------------------------------------------------------------------------------|
|                      | <b>Recommendation</b>             | If the duration exceeds 7 days, administer approximately 80% of the dose normally taken orally, parenterally.                                                                                                                                                                                                                                                                                                                                                                                                                                                                                                                                                                                                                                                                                                         |                                                                                                         |
|                      | <b>Reference</b>                  | Fish LH, et al. Replacement Dose, Metabolism, and Bioavailability of Levothyroxine in the Treatment of Hypothyroidism. NEJM 1987 [abstract]: <a href="http://www.nejm.org/doi/full/10.1056/NEJM198703263161302">http://www.nejm.org/doi/full/10.1056/NEJM198703263161302</a>                                                                                                                                                                                                                                                                                                                                                                                                                                                                                                                                          |                                                                                                         |
|                      | <b>Strength of recommendation</b> | Experts median agreement: agree<br>Median usefulness rating: useful                                                                                                                                                                                                                                                                                                                                                                                                                                                                                                                                                                                                                                                                                                                                                   | % of experts agree or strongly agree: 87.2 %<br>% of experts rating items useful or very useful: 89.7 % |
| 129<br>OP            | <b>Rational</b>                   | Look for induced thyroid disorders.<br>The TSH concentration is balanced after approximately 6 weeks of treatment.                                                                                                                                                                                                                                                                                                                                                                                                                                                                                                                                                                                                                                                                                                    |                                                                                                         |
|                      | <b>Remark</b>                     | * <u>Non-exhaustive list of drugs that may induce thyroid disorders</u> : aminoglutethimide, amiodarone, certain antineoplastics: tyrosine kinase inhibitors (imatinib, motesanib, sunitinib, sorafenib), bexarotene, thalidomide, thioamides, interferon alpha, interleukin-2, lithium, perchlorate, products containing iodine (iodine, radioactive iodine, iodized contrast products, potassium iodide solutions, iodized povidone), lithium salts.                                                                                                                                                                                                                                                                                                                                                                |                                                                                                         |
|                      | <b>References</b>                 | ATA/AACE 2012: Clinical practice guidelines for hypothyroidism in adults: <a href="http://aace.metapress.com/content/611883025v735392/fulltext.pdf">http://aace.metapress.com/content/611883025v735392/fulltext.pdf</a><br>ATA/AACE 2011: Hyperthyroidism and other causes of thyrotoxicosis: management guidelines: <a href="https://www.aace.com/files/hyper-guidelines-2011.pdf">https://www.aace.com/files/hyper-guidelines-2011.pdf</a>                                                                                                                                                                                                                                                                                                                                                                          |                                                                                                         |
|                      | <b>Strength of recommendation</b> | Experts median agreement: agree<br>Median usefulness rating: useful                                                                                                                                                                                                                                                                                                                                                                                                                                                                                                                                                                                                                                                                                                                                                   | % of experts agree or strongly agree: 94.9 %<br>% of experts rating items useful or very useful: 84.6 % |
| 130<br>UP            | <b>Rational</b>                   | Allow to decrease symptoms caused by the increase beta-adrenergic tonus (palpitations, tachycardia, shaking, anxiety, heat intolerance).<br>Propranolol inhibits the conversion of the T4 into T3.                                                                                                                                                                                                                                                                                                                                                                                                                                                                                                                                                                                                                    |                                                                                                         |
|                      | <b>Recommendation</b>             | In general, long-acting molecules are favoured: atenolol, metoprolol, nadolol, propranolol, etc.                                                                                                                                                                                                                                                                                                                                                                                                                                                                                                                                                                                                                                                                                                                      |                                                                                                         |
|                      | <b>Reference</b>                  | ATA/AACE 2011: Hyperthyroidism and other causes of thyrotoxicosis: management guidelines: <a href="https://www.aace.com/files/hyper-guidelines-2011.pdf">https://www.aace.com/files/hyper-guidelines-2011.pdf</a>                                                                                                                                                                                                                                                                                                                                                                                                                                                                                                                                                                                                     |                                                                                                         |
|                      | <b>Strength of recommendation</b> | Experts median agreement: agree<br>Median usefulness rating: useful                                                                                                                                                                                                                                                                                                                                                                                                                                                                                                                                                                                                                                                                                                                                                   | % of experts agree or strongly agree: 94.9 %<br>% of experts rating items useful or very useful: 92.3 % |
| <b>CONTRACEPTION</b> |                                   |                                                                                                                                                                                                                                                                                                                                                                                                                                                                                                                                                                                                                                                                                                                                                                                                                       |                                                                                                         |
| 131<br>DDI           | <b>Rational</b>                   | Risk of inefficacy of the contraceptive hormonal treatment or of the combination.                                                                                                                                                                                                                                                                                                                                                                                                                                                                                                                                                                                                                                                                                                                                     |                                                                                                         |
|                      | <b>Recommendation</b>             | Another method of contraception may optionally be offered.                                                                                                                                                                                                                                                                                                                                                                                                                                                                                                                                                                                                                                                                                                                                                            |                                                                                                         |
|                      | <b>Remark</b>                     | * <u>Non-exhaustive list of drugs interacting with hormonal contraceptives</u> : some antibiotics (rifampicin, rifabutin), some anti-epileptics (barbiturates, carbamazepine, lamotrigine, oxcarbamaepine, phenytoin, primidone, topiramate), some antiretrovirals.                                                                                                                                                                                                                                                                                                                                                                                                                                                                                                                                                   |                                                                                                         |
|                      | <b>Reference</b>                  | CDC 2013: U.S. Selected Practice Recommendations for Contraceptive Use. Adapted from the WHO Selected Practice Recommendations for Contraceptive Use, 2nd Edition: <a href="http://www.cdc.gov/mmwr/pdf/rr/rr6205.pdf">http://www.cdc.gov/mmwr/pdf/rr/rr6205.pdf</a>                                                                                                                                                                                                                                                                                                                                                                                                                                                                                                                                                  |                                                                                                         |
|                      | <b>Strength of recommendation</b> | Experts median agreement: agree<br>Median usefulness rating: useful                                                                                                                                                                                                                                                                                                                                                                                                                                                                                                                                                                                                                                                                                                                                                   | % of experts agree or strongly agree: 92.3 %<br>% of experts rating items useful or very useful: 84.6 % |
| <b>OPHTHALMOLOGY</b> |                                   |                                                                                                                                                                                                                                                                                                                                                                                                                                                                                                                                                                                                                                                                                                                                                                                                                       |                                                                                                         |
| <b>GLAUCOMA</b>      |                                   |                                                                                                                                                                                                                                                                                                                                                                                                                                                                                                                                                                                                                                                                                                                                                                                                                       |                                                                                                         |
| 132<br>UP            | <b>Rational</b>                   | Avoid forgetting prescriptions and avoid increasing the intraocular pressure during hospitalisation.                                                                                                                                                                                                                                                                                                                                                                                                                                                                                                                                                                                                                                                                                                                  |                                                                                                         |
|                      | <b>Strength of recommendation</b> | Experts median agreement: strongly agree<br>Median usefulness rating: very useful                                                                                                                                                                                                                                                                                                                                                                                                                                                                                                                                                                                                                                                                                                                                     | % of experts agree or strongly agree: 97.4 %<br>% of experts rating items useful or very useful: 92.3 % |
| 133<br>OP            | <b>Rational</b>                   | Risk of acute attack in patients with irido-closed angles.                                                                                                                                                                                                                                                                                                                                                                                                                                                                                                                                                                                                                                                                                                                                                            |                                                                                                         |
|                      | <b>Recommendation</b>             | Perform a laser iridotomy. After this treatment, these drugs may be administered again.                                                                                                                                                                                                                                                                                                                                                                                                                                                                                                                                                                                                                                                                                                                               |                                                                                                         |
|                      | <b>Remark</b>                     | * <u>Non-exhaustive list of drugs that may induce acute closed angle glaucoma</u> : alpha-adrenergic drugs (apraclonidine, dipivefrin, ephedrine, epinephrine, phenylephrine), drugs with anaesthetic properties (ketamine, succinylcholine), anticholinergics (atropine), anticoagulants (by massive retinal haemorrhage or unsticking of the choroid: rare), antidepressants (citalopram, escitalopram, fluoxetine, fluvoxamine, monoamine oxidase inhibitors, mianserin, paroxetine, tricyclics), certain antihistamines (cimetidine, ranitidine, promethazine), certain Parkinson's medications (orphenadrine, trihexyphenidyl), certain antipsychotics (fluphenazine, perphenazine, trifluoperazine), colchicine combined with opium and tiemonium methysulate, disopyramide, parasymphomimetics (acetylcholine, |                                                                                                         |

carbachol, pilocarpine), parasympatholytics (ipratropium bromide, scopolamine, anticholinergics spasmolytics thrombolytics and botulinum toxin.

**Reference** Razeghinejad MR, et al. Iatrogenic Glaucoma Secondary to Medications. The American Journal of Medicine 2011 (review): [http://www.dottnet.it/public/content/Documento/Glaucoma\\_iatrogeno\\_causato\\_da\\_farmaci.pdf](http://www.dottnet.it/public/content/Documento/Glaucoma_iatrogeno_causato_da_farmaci.pdf)

**Strength of recommendation** Experts median agreement: agree % of experts agree or strongly agree: 100 %  
Median usefulness rating: useful % of experts rating items useful or very useful: 82.1 %

## DEPENDENCIES

### ADDICTIONS and HOSPITALIZATION

134  
Other

**Rational** Allow to improve patients monitoring during hospitalisation and to offer an appropriate care before leaving the hospital.

**Recommendation** Depending on patient needs: simple information or referral to a specialised consultation.

**Remark** Possible use of a rapid addiction detection tool such as the WHO-ASSIST \*.

**Useful link** \*[http://www.who.int/substance\\_abuse/activities/assist\\_v3\\_english.pdf?ua=1](http://www.who.int/substance_abuse/activities/assist_v3_english.pdf?ua=1)

**Reference** WHO 2008: The Effectiveness of a Brief Intervention for Illicit Drugs Linked to the Alcohol, Smoking and Substance Involvement Screening Test (ASSIST) in Primary Health Care Settings: [http://www.who.int/substance\\_abuse/activities/assist\\_technicalreport\\_phase3\\_final.pdf?ua=1](http://www.who.int/substance_abuse/activities/assist_technicalreport_phase3_final.pdf?ua=1)

**Strength of recommendation** Experts median agreement: agree % of experts agree or strongly agree: 89.7 %  
Median usefulness rating: useful % of experts rating items useful or very useful: 79.5 %

### ALCOHOL DEPENDENCE

135  
Other

**Rational** Allow to prevent complicated withdrawal during hospitalisation.

**Recommendation** Use a rapid test such as the Audit, Audit-C, Fast or Cage/Deta tests\*.

**Remark** \*Cage/Deta (A total score of 2 or greater is considered clinically significant and is a good predictive criterion for an alcohol consumption problem):  
Have you ever felt you should cut down on your drinking?  
Have people annoyed you by criticizing your drinking?  
Have you ever felt bad or guilty about your drinking?  
Have you ever had a drink first thing in the morning to steady your nerves or to get rid of a hangover (eye opener)?

**Useful link** \*\*Cage questionnaire:  
<http://pubs.niaaa.nih.gov/publications/inscage.htm>

**Reference** Anderson P, et al. Alcohol and Primary Health Care: Clinical Guidelines on Identification and Brief Interventions. Department of Health of the Government of Catalonia: Barcelona 2005: [http://www.gencat.cat/salut/phepa/units/phepa/pdf/cg\\_1.pdf](http://www.gencat.cat/salut/phepa/units/phepa/pdf/cg_1.pdf)

**Strength of recommendation** Experts median agreement: agree % of experts agree or strongly agree: 87.2 %  
Median usefulness rating: useful % of experts rating items useful or very useful: 69.2 %

136  
UP

**Rational** Allow to prevent complicated withdrawal during hospitalisation

**Recommendations** Use a predictive evolution scale such as the CIWA-Ar\* (Clinical Index Withdrawal Assessment-Revised) or the Cushman withdrawal score.

**Remark** \*Non-exhaustive list of benzodiazepines that may be used in case of risk of alcohol withdrawal: chlordiazepoxide (50–100 mg), diazepam (10–20 mg), lorazepam (2–4 mg), oxazepam (15–30 mg), 4 to 6 doses/d.

The prescription duration should not exceed 7 days, except in case of complications, and the dose should be gradually reduced (20% per day).

**Useful link** \*Clinical Institute Withdrawal Assessment of Alcohol Scale, Revised (CIWA-Ar): <http://wiki.hl7.org/images/2/25/Alcohol-Withdrawal-Assessment-Scale.pdf>

**References** HUG 2010 : alcohol consumption problem: [http://www.hug-ge.ch/sites/interhug/files/structures/medecine\\_de\\_premier\\_recours/documents/infos\\_soignants/probleme\\_d\\_alcool\\_2010df.pdf](http://www.hug-ge.ch/sites/interhug/files/structures/medecine_de_premier_recours/documents/infos_soignants/probleme_d_alcool_2010df.pdf)  
R. Saitz et al. Unhealthy alcohol use, clinical practice, NEJM, 2005: <http://www.nejm.org/doi/pdf/10.1056/NEJM200505193522021>  
ANAES 1999 : Conférence de consensus Objectifs, indications et modalités du sevrage du patient alcoolodépendant : <http://www.has-sante.fr/portail/upload/docs/application/pdf/alcool.court.pdf>

**Strength of recommendation** Experts median agreement: agree % of experts agree or strongly agree: 94.9 %  
Median usefulness rating: useful % of experts rating items useful or very useful: 89.7 %

|                                           |                                   |                                                                                                                                                                                                                                                                                                                                                                                                                                                                                                                                                                                                                                                                                                                                                                                                                                                                                                                                                                                                                                                                                                                                                                                                                                                                                                                                                                                                                                                     |
|-------------------------------------------|-----------------------------------|-----------------------------------------------------------------------------------------------------------------------------------------------------------------------------------------------------------------------------------------------------------------------------------------------------------------------------------------------------------------------------------------------------------------------------------------------------------------------------------------------------------------------------------------------------------------------------------------------------------------------------------------------------------------------------------------------------------------------------------------------------------------------------------------------------------------------------------------------------------------------------------------------------------------------------------------------------------------------------------------------------------------------------------------------------------------------------------------------------------------------------------------------------------------------------------------------------------------------------------------------------------------------------------------------------------------------------------------------------------------------------------------------------------------------------------------------------|
| 137<br>UP                                 | <b>Rational</b>                   | Risk of vitamin B1 deficiency in alcoholic patients due to decreased digestive absorption in case of alcohol abuse and malnutrition.                                                                                                                                                                                                                                                                                                                                                                                                                                                                                                                                                                                                                                                                                                                                                                                                                                                                                                                                                                                                                                                                                                                                                                                                                                                                                                                |
|                                           | <b>Recommendations</b>            | Administer 100 to 300 mg/d of vitamin B1 for 3 weeks (in case of withdrawal).<br>If there are signs of deficiency, favour the parenteral route, 1 to 2 times per day, the 1 <sup>st</sup> week (decreased digestive absorption of vitamin B1 in case of alcohol abuse or malnutrition).<br>Vitamin B6 and vitamin PP (nicotinamide) can be combined over a short period.                                                                                                                                                                                                                                                                                                                                                                                                                                                                                                                                                                                                                                                                                                                                                                                                                                                                                                                                                                                                                                                                            |
|                                           | <b>References</b>                 | HUG 2010 : alcohol consumption problem: <a href="http://www.hug-ge.ch/sites/interhug/files/structures/medecine_de_premier_recours/documents/infos_soignants/probleme_d_alcool_2010df.pdf">http://www.hug-ge.ch/sites/interhug/files/structures/medecine_de_premier_recours/documents/infos_soignants/probleme_d_alcool_2010df.pdf</a><br>SFA 2006 : Sevrage simple en alcool : <a href="http://www.sfalcoologie.asso.fr/download/Svg_simple.pdf">http://www.sfalcoologie.asso.fr/download/Svg_simple.pdf</a><br>Yersin B, et al. Syndrome de sevrage alcoolique : Prise en charge ambulatoire par le médecin praticien. Rev Méd Suisse romande 1998 : <a href="http://cms.addiction-valais.ch/Upload/medrotox/5_3_Syndrome_sevrage_alcoolique.pdf">http://cms.addiction-valais.ch/Upload/medrotox/5_3_Syndrome_sevrage_alcoolique.pdf</a><br>Gian Pietro S, et al. Wernicke's encephalopathy: new clinical settings and recent advances in diagnosis and management. Lancet Neurol 2007 [abstract] : <a href="http://www.thelancet.com/journals/laneur/article/PIIS1474-4422(07)70104-7/abstract">http://www.thelancet.com/journals/laneur/article/PIIS1474-4422(07)70104-7/abstract</a><br>ANAES/ SFA 1999 : Conférence de consensus. Objectifs, indications et modalités du sevrage du patient alcoolodépendant : <a href="http://www.sfm.org/documents/consensus/cc_sevoh_long.pdf">http://www.sfm.org/documents/consensus/cc_sevoh_long.pdf</a> |
|                                           | <b>Strength of recommendation</b> | Experts median agreement: agree % of experts agree or strongly agree: 84.6 %<br>Median usefulness rating: useful % of experts rating items useful or very useful: 89.7 %                                                                                                                                                                                                                                                                                                                                                                                                                                                                                                                                                                                                                                                                                                                                                                                                                                                                                                                                                                                                                                                                                                                                                                                                                                                                            |
| <b>TOBACCO USE and TOBACCO WITHDRAWAL</b> |                                   |                                                                                                                                                                                                                                                                                                                                                                                                                                                                                                                                                                                                                                                                                                                                                                                                                                                                                                                                                                                                                                                                                                                                                                                                                                                                                                                                                                                                                                                     |
| 138<br>UP                                 | <b>Rational</b>                   | Allow to prevent withdrawal during hospitalisation                                                                                                                                                                                                                                                                                                                                                                                                                                                                                                                                                                                                                                                                                                                                                                                                                                                                                                                                                                                                                                                                                                                                                                                                                                                                                                                                                                                                  |
|                                           | <b>Recommendation</b>             | Patients in intensive care should not systematically receive nicotine substitutes; only those for whom the expected benefits exceed the toxicity risks should receive them.                                                                                                                                                                                                                                                                                                                                                                                                                                                                                                                                                                                                                                                                                                                                                                                                                                                                                                                                                                                                                                                                                                                                                                                                                                                                         |
|                                           | <b>Reference</b>                  | Wilby K, et al. Nicotine replacement therapy in the intensive care unit: a systematic review. J Intensive Care Med. 2014 [abstract]: <a href="http://jic.sagepub.com/content/29/1/22.abstract">http://jic.sagepub.com/content/29/1/22.abstract</a>                                                                                                                                                                                                                                                                                                                                                                                                                                                                                                                                                                                                                                                                                                                                                                                                                                                                                                                                                                                                                                                                                                                                                                                                  |
|                                           | <b>Strength of recommendation</b> | Experts median agreement: agree % of experts agree or strongly agree: 97.4 %<br>Median usefulness rating: useful % of experts rating items useful or very useful: 89.7 %                                                                                                                                                                                                                                                                                                                                                                                                                                                                                                                                                                                                                                                                                                                                                                                                                                                                                                                                                                                                                                                                                                                                                                                                                                                                            |
| 139<br>UP                                 | <b>Rational</b>                   | Quitting tobacco has a large capacity to prevent cardiovascular events and to influence the natural history of chronic respiratory diseases.                                                                                                                                                                                                                                                                                                                                                                                                                                                                                                                                                                                                                                                                                                                                                                                                                                                                                                                                                                                                                                                                                                                                                                                                                                                                                                        |
|                                           | <b>Recommendation</b>             | Treatments using nicotine substitutes, extended-release bupropion or varenicline may be offered to favour long-term tobacco cessation.                                                                                                                                                                                                                                                                                                                                                                                                                                                                                                                                                                                                                                                                                                                                                                                                                                                                                                                                                                                                                                                                                                                                                                                                                                                                                                              |
|                                           | <b>References</b>                 | EMA 2010: Overview of comments received on draft guideline on the development of medicinal products for the treatment of smoking: <a href="http://www.ema.europa.eu/docs/en_GB/document_library/Other/2009/11/WC500011384.pdf">http://www.ema.europa.eu/docs/en_GB/document_library/Other/2009/11/WC500011384.pdf</a><br>GOLD 2014: <a href="http://www.goldcopd.org/uploads/users/files/GOLD_Report_2014.pdf">http://www.goldcopd.org/uploads/users/files/GOLD_Report_2014.pdf</a>                                                                                                                                                                                                                                                                                                                                                                                                                                                                                                                                                                                                                                                                                                                                                                                                                                                                                                                                                                 |
|                                           | <b>Strength of recommendation</b> | Experts median agreement: strongly agree % of experts agree or strongly agree: 100 %<br>Median usefulness rating: useful % of experts rating items useful or very useful: 94.9 %                                                                                                                                                                                                                                                                                                                                                                                                                                                                                                                                                                                                                                                                                                                                                                                                                                                                                                                                                                                                                                                                                                                                                                                                                                                                    |
| <b>BENZODIAZEPINE DEPENDENCE</b>          |                                   |                                                                                                                                                                                                                                                                                                                                                                                                                                                                                                                                                                                                                                                                                                                                                                                                                                                                                                                                                                                                                                                                                                                                                                                                                                                                                                                                                                                                                                                     |
| 140<br>UP                                 | <b>Rational</b>                   | Allow to prevent withdrawal during hospitalisation.                                                                                                                                                                                                                                                                                                                                                                                                                                                                                                                                                                                                                                                                                                                                                                                                                                                                                                                                                                                                                                                                                                                                                                                                                                                                                                                                                                                                 |
|                                           | <b>Recommendation</b>             | Do not stop BZD treatment abruptly.                                                                                                                                                                                                                                                                                                                                                                                                                                                                                                                                                                                                                                                                                                                                                                                                                                                                                                                                                                                                                                                                                                                                                                                                                                                                                                                                                                                                                 |
|                                           | <b>Reference</b>                  | HUG 2010 : PharmaKit, Formation post-graduée en addictologie: <a href="http://www.hug-ge.ch/sites/interhug/files/structures/addictologie/documents/Formation/Postgrade/Starterkit/pharmakit.pdf">http://www.hug-ge.ch/sites/interhug/files/structures/addictologie/documents/Formation/Postgrade/Starterkit/pharmakit.pdf</a>                                                                                                                                                                                                                                                                                                                                                                                                                                                                                                                                                                                                                                                                                                                                                                                                                                                                                                                                                                                                                                                                                                                       |
|                                           | <b>Strength of recommendation</b> | Experts median agreement: agree % of experts agree or strongly agree: 89.7 %<br>Median usefulness rating: useful % of experts rating items useful or very useful: 92.3 %                                                                                                                                                                                                                                                                                                                                                                                                                                                                                                                                                                                                                                                                                                                                                                                                                                                                                                                                                                                                                                                                                                                                                                                                                                                                            |
| <b>OPIOID DEPENDENCE</b>                  |                                   |                                                                                                                                                                                                                                                                                                                                                                                                                                                                                                                                                                                                                                                                                                                                                                                                                                                                                                                                                                                                                                                                                                                                                                                                                                                                                                                                                                                                                                                     |
| 141<br>UP                                 | <b>Rational</b>                   | Allow to prevent withdrawal during hospitalization.                                                                                                                                                                                                                                                                                                                                                                                                                                                                                                                                                                                                                                                                                                                                                                                                                                                                                                                                                                                                                                                                                                                                                                                                                                                                                                                                                                                                 |
|                                           | <b>Strength of recommendation</b> | Experts median agreement: strongly agree % of experts agree or strongly agree: 97.4 %<br>Median usefulness rating: useful % of experts rating items useful or very useful: 89.7 %                                                                                                                                                                                                                                                                                                                                                                                                                                                                                                                                                                                                                                                                                                                                                                                                                                                                                                                                                                                                                                                                                                                                                                                                                                                                   |
| 142<br>DDI                                | <b>Rational</b>                   | Risk of lower efficacy of the antalgic treatment by occupation of the opiate receptors by the buprenorphine.                                                                                                                                                                                                                                                                                                                                                                                                                                                                                                                                                                                                                                                                                                                                                                                                                                                                                                                                                                                                                                                                                                                                                                                                                                                                                                                                        |
|                                           | <b>Remark</b>                     | The treatment for the pain and the substitution treatment may be re-evaluated and adapted with the help of a pain specialist                                                                                                                                                                                                                                                                                                                                                                                                                                                                                                                                                                                                                                                                                                                                                                                                                                                                                                                                                                                                                                                                                                                                                                                                                                                                                                                        |
|                                           | <b>Reference</b>                  | Suboxone summary of product characteristics (2015) : <a href="http://www.ema.europa.eu/docs/en_GB/document_library/EPAR_-_Product_Information/human/000697/WC500058505.pdf">http://www.ema.europa.eu/docs/en_GB/document_library/EPAR_-_Product_Information/human/000697/WC500058505.pdf</a>                                                                                                                                                                                                                                                                                                                                                                                                                                                                                                                                                                                                                                                                                                                                                                                                                                                                                                                                                                                                                                                                                                                                                        |
|                                           | <b>Strength of recommendation</b> | Experts median agreement: agree % of experts agree or strongly agree: 89.7 %<br>Median usefulness rating: useful % of experts rating items useful or very useful: 92.3 %                                                                                                                                                                                                                                                                                                                                                                                                                                                                                                                                                                                                                                                                                                                                                                                                                                                                                                                                                                                                                                                                                                                                                                                                                                                                            |

## OBESITY

### PROPER USE OF DRUGS IN CASE OF OBESITY

|              |                                   |                                                                                                                                                                                                                                                                                                                                                                                                                                                                                                                                                                                                                                                                                                                                                                                                                                                                                                                                    |                                              |
|--------------|-----------------------------------|------------------------------------------------------------------------------------------------------------------------------------------------------------------------------------------------------------------------------------------------------------------------------------------------------------------------------------------------------------------------------------------------------------------------------------------------------------------------------------------------------------------------------------------------------------------------------------------------------------------------------------------------------------------------------------------------------------------------------------------------------------------------------------------------------------------------------------------------------------------------------------------------------------------------------------|----------------------------------------------|
| 143<br>Other | <b>Rational</b>                   | Obesity is a risk factor for venous thromboembolism.                                                                                                                                                                                                                                                                                                                                                                                                                                                                                                                                                                                                                                                                                                                                                                                                                                                                               |                                              |
|              | <b>Recommendation</b>             | <p><u>Daily suggested dosing regimen</u>: Use the total body weight to determine the doses to be administered.</p> <p><u>Prophylactic treatment</u>: increase the dosing regimens by 30% if body mass index (BMI) <math>\geq</math> 40 kg/m<sup>2</sup>.</p> <p><u>Curative treatment</u>: subcutaneous administration (adapt the needle size) of enoxaparin BID and unfractionated heparins TID. Monitor anti-Xa activity for patients with BMI <math>\geq</math> 40 kg/m<sup>2</sup>. Fondaparinux recommended dose, in patients over 100 kg with venous thromboembolism: 10 mg QD, administered subcutaneously.</p>                                                                                                                                                                                                                                                                                                             |                                              |
|              | <b>References</b>                 | <p>Nutescu E, et al. Low-Molecular-Weight Heparins in Renal Impairment and Obesity: Available Evidence and Clinical Practice Recommendations Across Medical and Surgical Settings. Ann Pharmacother 2009: <a href="http://excellence.acforum.org/sites/default/files/nutescu_dosing%20LMWH%20special%20populations.pdf">http://excellence.acforum.org/sites/default/files/nutescu_dosing%20LMWH%20special%20populations.pdf</a></p> <p>ACCP 2012: Antithrombotic Therapy and Prevention of Thrombosis (9th Edition): <a href="http://journal.publications.chestnet.org/article.aspx?articleID=1159453">http://journal.publications.chestnet.org/article.aspx?articleID=1159453</a></p> <p>ACCP 2008: Prevention of Venous Thromboembolism (8th Edition): <a href="http://journal.publications.chestnet.org/data/Journals/CHEST/22073/381S.pdf">http://journal.publications.chestnet.org/data/Journals/CHEST/22073/381S.pdf</a></p> |                                              |
|              | <b>Strength of recommendation</b> | Experts median agreement: agree                                                                                                                                                                                                                                                                                                                                                                                                                                                                                                                                                                                                                                                                                                                                                                                                                                                                                                    | % of experts agree or strongly agree: 92.3 % |
|              | Median usefulness rating: useful  | % of experts rating items useful or very useful: 94.9 %                                                                                                                                                                                                                                                                                                                                                                                                                                                                                                                                                                                                                                                                                                                                                                                                                                                                            |                                              |
| 144<br>Other | <b>Rational</b>                   | <p>Intramuscular (IM), subcutaneous (SC) and cutaneous absorption in obese patients is variable.</p> <p>IM: Frequent intra-lipomatous injection.</p> <p>SC: crossing of the lipophilic layer unpredictable.</p> <p>Cutaneous route: unsuitable transdermal systems.</p>                                                                                                                                                                                                                                                                                                                                                                                                                                                                                                                                                                                                                                                            |                                              |
|              | <b>Recommendation</b>             | If the IM or SC route must be used, adapt the needle size accordingly.                                                                                                                                                                                                                                                                                                                                                                                                                                                                                                                                                                                                                                                                                                                                                                                                                                                             |                                              |
|              | <b>Reference</b>                  | Cockshott P, et al. Intramuscular or intralipomatous injections. NEJM 1982 [abstract]: <a href="http://www.nejm.org/doi/full/10.1056/NEJM198208053070607">http://www.nejm.org/doi/full/10.1056/NEJM198208053070607</a>                                                                                                                                                                                                                                                                                                                                                                                                                                                                                                                                                                                                                                                                                                             |                                              |
|              | <b>Strength of recommendation</b> | Experts median agreement: agree                                                                                                                                                                                                                                                                                                                                                                                                                                                                                                                                                                                                                                                                                                                                                                                                                                                                                                    | % of experts agree or strongly agree: 82.1 % |
|              | Median usefulness rating: useful  | % of experts rating items useful or very useful: 79.5 %                                                                                                                                                                                                                                                                                                                                                                                                                                                                                                                                                                                                                                                                                                                                                                                                                                                                            |                                              |
| 145<br>Other | <b>Rational</b>                   | Hydrophilic molecules whose kinetic is modified in case of obesity.                                                                                                                                                                                                                                                                                                                                                                                                                                                                                                                                                                                                                                                                                                                                                                                                                                                                |                                              |
|              | <b>Recommendations</b>            | <p>Monitor plasma concentrations.</p> <p>*Formula to calculate the adjusted weight = ideal weight** + 0.43 x (Total Body Weight - Ideal Weight**).</p> <p>**Ideal weights = (Lorentz formula expressed in kg, used in adults over the age of 18 years measuring between 140 and 220 cm)</p> <p>Women = Waist (cm) – 100 – [(Waist (cm)-150)/2.5]</p> <p>Men = Waist (cm) – 100 – [(Waist (cm)-150)/4]</p> <p>Also consider adjusting the dose based on the patient's renal function.</p>                                                                                                                                                                                                                                                                                                                                                                                                                                           |                                              |
|              | <b>Reference</b>                  | AFSSAPS/ SPILF/ GPII 2011 : mise au point sur le bon usage des aminosides administrés par voie injectable : gentamicine, tobramycine, nétilmicine, amikacine : <a href="http://ansm.sante.fr/var/ansm_site/storage/original/application/3e0d2264e2921c8465d9ad6464e12660.pdf">http://ansm.sante.fr/var/ansm_site/storage/original/application/3e0d2264e2921c8465d9ad6464e12660.pdf</a>                                                                                                                                                                                                                                                                                                                                                                                                                                                                                                                                             |                                              |
|              | <b>Strength of recommendation</b> | Experts median agreement: strongly agree                                                                                                                                                                                                                                                                                                                                                                                                                                                                                                                                                                                                                                                                                                                                                                                                                                                                                           | % of experts agree or strongly agree: 97.4 % |
|              | Median usefulness rating: useful  | % of experts rating items useful or very useful: 92.3 %                                                                                                                                                                                                                                                                                                                                                                                                                                                                                                                                                                                                                                                                                                                                                                                                                                                                            |                                              |
| 146<br>Other | <b>Rational</b>                   | Molecules whose kinetic is modified in case of obesity.                                                                                                                                                                                                                                                                                                                                                                                                                                                                                                                                                                                                                                                                                                                                                                                                                                                                            |                                              |
|              | <b>Recommendation</b>             | Monitor plasma concentrations.                                                                                                                                                                                                                                                                                                                                                                                                                                                                                                                                                                                                                                                                                                                                                                                                                                                                                                     |                                              |
|              | <b>References</b>                 | <p>ASHSP/ IDSA/ SIDP 2010: Therapeutic Monitoring of Vancomycin in Adult Patients: <a href="http://www.ncbi.nlm.nih.gov/pmc/articles/PMC2826264/pdf/cbr_31_1_21.pdf">http://www.ncbi.nlm.nih.gov/pmc/articles/PMC2826264/pdf/cbr_31_1_21.pdf</a></p> <p>Rybak M, et al. Therapeutic monitoring of vancomycin in adult patients: A consensus review of the American Society of Health-System Pharmacists, the Infectious Diseases Society of America, and the Society of Infectious Diseases Pharmacists. Am J Health-Syst Pharm. 2009: <a href="http://www.ajhp.org/content/66/1/82.full.pdf">http://www.ajhp.org/content/66/1/82.full.pdf</a></p>                                                                                                                                                                                                                                                                                 |                                              |
|              | <b>Strength of recommendation</b> | Experts median agreement: strongly agree                                                                                                                                                                                                                                                                                                                                                                                                                                                                                                                                                                                                                                                                                                                                                                                                                                                                                           | % of experts agree or strongly agree: 94.9 % |
|              | Median usefulness rating: useful  | % of experts rating items useful or very useful: 89.7 %                                                                                                                                                                                                                                                                                                                                                                                                                                                                                                                                                                                                                                                                                                                                                                                                                                                                            |                                              |

## PHARMACOLOGY AND TOXICOLOGY

### CLINICAL PHARMACOLOGY

|           |                       |                                                                                                 |
|-----------|-----------------------|-------------------------------------------------------------------------------------------------|
| 147<br>OP | <b>Rational</b>       | Potential allergic reaction.                                                                    |
|           | <b>Recommendation</b> | Outline the allergy check in the patient's file and choose a therapeutic alternative in case of |

|            |                                   |                                                                                                                                                                                                                                                                                                                                                                                                                                                                                                                                                                                                                                                                                                                                                                                                                                                                                                                                                                                                                                                                                                                                                                                                                                                                                                                                                                                                                                                                                                                                                                                                                                                                                                                                                                  |                                                                                                         |
|------------|-----------------------------------|------------------------------------------------------------------------------------------------------------------------------------------------------------------------------------------------------------------------------------------------------------------------------------------------------------------------------------------------------------------------------------------------------------------------------------------------------------------------------------------------------------------------------------------------------------------------------------------------------------------------------------------------------------------------------------------------------------------------------------------------------------------------------------------------------------------------------------------------------------------------------------------------------------------------------------------------------------------------------------------------------------------------------------------------------------------------------------------------------------------------------------------------------------------------------------------------------------------------------------------------------------------------------------------------------------------------------------------------------------------------------------------------------------------------------------------------------------------------------------------------------------------------------------------------------------------------------------------------------------------------------------------------------------------------------------------------------------------------------------------------------------------|---------------------------------------------------------------------------------------------------------|
|            |                                   | allergy.                                                                                                                                                                                                                                                                                                                                                                                                                                                                                                                                                                                                                                                                                                                                                                                                                                                                                                                                                                                                                                                                                                                                                                                                                                                                                                                                                                                                                                                                                                                                                                                                                                                                                                                                                         |                                                                                                         |
|            | <b>Strength of recommendation</b> | Experts median agreement: strongly agree<br>Median usefulness rating: very useful                                                                                                                                                                                                                                                                                                                                                                                                                                                                                                                                                                                                                                                                                                                                                                                                                                                                                                                                                                                                                                                                                                                                                                                                                                                                                                                                                                                                                                                                                                                                                                                                                                                                                | % of experts agree or strongly agree: 97.4 %<br>% of experts rating items useful or very useful: 89.7 % |
|            | <b>Rational</b>                   | Risk of torsade de pointes.                                                                                                                                                                                                                                                                                                                                                                                                                                                                                                                                                                                                                                                                                                                                                                                                                                                                                                                                                                                                                                                                                                                                                                                                                                                                                                                                                                                                                                                                                                                                                                                                                                                                                                                                      |                                                                                                         |
|            | <b>Recommendations</b>            | Monitor the electrocardiogram in case of necessary use.<br>If long QT syndrome appears in relation to taking the drugs, to an interaction, to an overdose, to the presence of several at-risk drugs, the patient's treatment should be adapted.                                                                                                                                                                                                                                                                                                                                                                                                                                                                                                                                                                                                                                                                                                                                                                                                                                                                                                                                                                                                                                                                                                                                                                                                                                                                                                                                                                                                                                                                                                                  |                                                                                                         |
|            | <b>Remarks</b>                    | <p>*<u>Non-exhaustive list of drugs that may cause an elongation of the QT interval</u>: some antiarrhythmics (amiodarone, disopyramide, dofetilide, dronedarone, flecainide, ibutilide, procainamide, quinidine, sotalol), some antibiotics (azithromycin, bedaquiline, ciprofloxacin, clarithromycin, erythromycin, levofloxacin, moxifloxacin, norfloxacin, ofloxacin, pentamidine, roxithromycin, spitamycin IV, telithromycin, trimethoprim-sulfamethoxazole), some antineoplastics (arsenic, dabrafenib, eribulin, lapatinib, nilotinib, sunitinib, tamoxifen, vorinostat), some antidepressants (amitriptyline, amoxapine, citalopram, clomipramine, desipramine, doxepin, escitalopram, fluoxetine, imipramine, mirtazapine, nortriptyline, paroxetine, protriptyline, sertraline, trazodone, trimipramine, venlafaxine), some antifungals (fluconazole, itraconazole, ketoconazole, posaconazole, voriconazole), some antimalarials (chloroquine, halofantrine, quinine sulphate), some antivirals (amantadine, atazanavir, foscarnet, nelfinavir, rilpivirine, ritonavir, saquinavir, telaprevir), methadone, neuroleptics (amisulpride, aripiprazole, chlorpromazine, clozapine, cyamemazine, droperidol, fluphenazine, haloperidol, levomepromazine, olanzapine, pimozide, pipamperone, promethazine, quetiapine, risperidone, sertindole, sulpiride, sultopride, tiapride, zuclopenthixol).</p> <p>**<u>Risk factors for elongation of the QTc interval</u>: age &gt; 65 years, female, cardiopathies: heart failure, ischaemia, myocardial hypertrophy, bradycardia, 2<sup>nd</sup> or 3<sup>rd</sup> degree intra-ventricular blockage, electrolytic disorders (in particular hypokalaemia and hypomagnesaemia), congenital long QT syndrome.</p> |                                                                                                         |
|            | <b>Useful link</b>                | Crediblemeds: All QTDrugs: <a href="http://www.crediblemeds.org/everyone/composite-list-all-qtdrugs/?rf=All">http://www.crediblemeds.org/everyone/composite-list-all-qtdrugs/?rf=All</a>                                                                                                                                                                                                                                                                                                                                                                                                                                                                                                                                                                                                                                                                                                                                                                                                                                                                                                                                                                                                                                                                                                                                                                                                                                                                                                                                                                                                                                                                                                                                                                         |                                                                                                         |
|            | <b>Strength of recommendation</b> | Experts median agreement: strongly agree<br>Median usefulness rating: useful                                                                                                                                                                                                                                                                                                                                                                                                                                                                                                                                                                                                                                                                                                                                                                                                                                                                                                                                                                                                                                                                                                                                                                                                                                                                                                                                                                                                                                                                                                                                                                                                                                                                                     | % of experts agree or strongly agree: 100 %<br>% of experts rating items useful or very useful: 97.4 %  |
|            | <b>Rational</b>                   | Risk of serotonin syndrome.                                                                                                                                                                                                                                                                                                                                                                                                                                                                                                                                                                                                                                                                                                                                                                                                                                                                                                                                                                                                                                                                                                                                                                                                                                                                                                                                                                                                                                                                                                                                                                                                                                                                                                                                      |                                                                                                         |
|            | <b>Recommendation</b>             | Adapt treatments or monitor patients closely.                                                                                                                                                                                                                                                                                                                                                                                                                                                                                                                                                                                                                                                                                                                                                                                                                                                                                                                                                                                                                                                                                                                                                                                                                                                                                                                                                                                                                                                                                                                                                                                                                                                                                                                    |                                                                                                         |
|            | <b>Remark</b>                     | * <u>Non-exhaustive list of drugs that may increase serotonin concentrations at the SNC</u> : tricyclic antidepressants, some anti-Parkinson medications, antipsychotics, buspirone, codeine, fentanyl, dextromethorphan, SSRIs, SNRIs, monoamine oxidase inhibitors, hypericum, setrons, tramadol, triptans.                                                                                                                                                                                                                                                                                                                                                                                                                                                                                                                                                                                                                                                                                                                                                                                                                                                                                                                                                                                                                                                                                                                                                                                                                                                                                                                                                                                                                                                    |                                                                                                         |
|            | <b>Reference</b>                  | Boyer E, et al. The Serotonin Syndrome. NEJM 2005:<br><a href="http://www.nejm.org.gate2.inist.fr/doi/pdf/10.1056/NEJMra041867">http://www.nejm.org.gate2.inist.fr/doi/pdf/10.1056/NEJMra041867</a>                                                                                                                                                                                                                                                                                                                                                                                                                                                                                                                                                                                                                                                                                                                                                                                                                                                                                                                                                                                                                                                                                                                                                                                                                                                                                                                                                                                                                                                                                                                                                              |                                                                                                         |
|            | <b>Strength of recommendation</b> | Experts median agreement: agree<br>Median usefulness rating: useful                                                                                                                                                                                                                                                                                                                                                                                                                                                                                                                                                                                                                                                                                                                                                                                                                                                                                                                                                                                                                                                                                                                                                                                                                                                                                                                                                                                                                                                                                                                                                                                                                                                                                              | % of experts agree or strongly agree: 94.9 %<br>% of experts rating items useful or very useful: 87.2 % |
|            | <b>Rational</b>                   | Risk of exacerbation of the extrapyramidal syndrome.                                                                                                                                                                                                                                                                                                                                                                                                                                                                                                                                                                                                                                                                                                                                                                                                                                                                                                                                                                                                                                                                                                                                                                                                                                                                                                                                                                                                                                                                                                                                                                                                                                                                                                             |                                                                                                         |
|            | <b>Recommendation</b>             | Stop the treatments or decrease the dosing regimens if possible (stopping treatments allows a differential diagnosis and a decrease or elimination of symptomatology).                                                                                                                                                                                                                                                                                                                                                                                                                                                                                                                                                                                                                                                                                                                                                                                                                                                                                                                                                                                                                                                                                                                                                                                                                                                                                                                                                                                                                                                                                                                                                                                           |                                                                                                         |
|            | <b>Remark</b>                     | * <u>Non-exhaustive list of drugs that may induce an extrapyramidal syndrome</u> : amphotericin B, some antiarrhythmics (amiodarone, procaine), some antidepressants (selective serotonin reuptake inhibitors: fluoxetine, sertraline, monoamine oxidase inhibitors: moclobemide, phenelzine), some anti-emetics: alizapride, metoclopramide, prochlorperazine, promethazine, certain anti-epileptics (levetiracetam phenytoin, valproate), standard antipsychotics (amisulpride, flupentixol, fluphenazine, haloperidol, levomepromazine, pimozide, prochlorperazine, promazine, sulpiride, thioridazine, thioxanthenes, zuclopenthixol), non-standard antipsychotics (aripiprazole, clozapine, olanzapine, quetiapine, risperidone, ziprasidone), some antivirals (aciclovir, antiretrovirals, vidarabine), alpha-methyl dopa, cinnarizine, flunarizine, certain hormones (epinephrine (adrenaline), levothyroxine sodium, medroxyprogesterone, some immunosuppressants (cyclosporine, tacrolimus), calcium                                                                                                                                                                                                                                                                                                                                                                                                                                                                                                                                                                                                                                                                                                                                                    |                                                                                                         |
| 148<br>OP  |                                   |                                                                                                                                                                                                                                                                                                                                                                                                                                                                                                                                                                                                                                                                                                                                                                                                                                                                                                                                                                                                                                                                                                                                                                                                                                                                                                                                                                                                                                                                                                                                                                                                                                                                                                                                                                  |                                                                                                         |
| 149<br>DDI |                                   |                                                                                                                                                                                                                                                                                                                                                                                                                                                                                                                                                                                                                                                                                                                                                                                                                                                                                                                                                                                                                                                                                                                                                                                                                                                                                                                                                                                                                                                                                                                                                                                                                                                                                                                                                                  |                                                                                                         |
| 150<br>OP  |                                   |                                                                                                                                                                                                                                                                                                                                                                                                                                                                                                                                                                                                                                                                                                                                                                                                                                                                                                                                                                                                                                                                                                                                                                                                                                                                                                                                                                                                                                                                                                                                                                                                                                                                                                                                                                  |                                                                                                         |

|                               |                                   |                                                                                                                                                                                                                                                                                                                                                                                                                                                                     |
|-------------------------------|-----------------------------------|---------------------------------------------------------------------------------------------------------------------------------------------------------------------------------------------------------------------------------------------------------------------------------------------------------------------------------------------------------------------------------------------------------------------------------------------------------------------|
|                               |                                   | inhibitors (diltiazem, verapamil), devastatingly, lithium, reserpine, tetrabenazine.                                                                                                                                                                                                                                                                                                                                                                                |
|                               | <b>Reference</b>                  | Lopez-Sendon J, et al. Drug-induced parkinsonism. Expert Opin. Drug Saf. 2013 [abstract]: <a href="http://informahealthcare.com/doi/abs/10.1517/14740338.2013.787065">http://informahealthcare.com/doi/abs/10.1517/14740338.2013.787065</a>                                                                                                                                                                                                                         |
|                               | <b>Strength of recommendation</b> | Experts median agreement: strongly agree % of experts agree or strongly agree: 100 %<br>Median usefulness rating: useful % of experts rating items useful or very useful: 89.7 %                                                                                                                                                                                                                                                                                    |
| 151<br>OP                     | <b>Rational</b>                   | Risk of acute haemolysis.                                                                                                                                                                                                                                                                                                                                                                                                                                           |
|                               | <b>Recommendations</b>            | Substances may be contraindicated, not advised (except under particular situations) due to observed cases of acute haemolysis, not advised (except in specific situations) because they belong to an at-risk pharmacological class, or potential risk of haemolysis, or not advised at a high dosing regimen, verification on a list* is advised.<br>Favour a therapeutic alternative if one is available.                                                          |
|                               | <b>Useful link</b>                | *ANSM Médicaments et déficit en Glucose-6-Phosphate Déshydrogénase (G6PD)<br>Classement des médicaments par substance active: <a href="http://ansm.sante.fr/S-informer/Points-d-information-Points-d-information/Medicament-et-deficit-en-G6PD-l-ANSM-actualise-le-referentiel-Point-d-Information">http://ansm.sante.fr/S-informer/Points-d-information-Points-d-information/Medicament-et-deficit-en-G6PD-l-ANSM-actualise-le-referentiel-Point-d-Information</a> |
|                               | <b>Reference</b>                  | ANSM 2014 : Médicaments et déficit en Glucose-6-Phosphate Déshydrogénase (G6PD). Classement des médicaments par substance active : <a href="http://www.vigifavisme.com/wp-content/uploads/2014/06/liste_substances2014.pdf">http://www.vigifavisme.com/wp-content/uploads/2014/06/liste_substances2014.pdf</a>                                                                                                                                                      |
|                               | <b>Strength of recommendation</b> | Experts median agreement: strongly agree % of experts agree or strongly agree: 100 %<br>Median usefulness rating: useful % of experts rating items useful or very useful: 89.7 %                                                                                                                                                                                                                                                                                    |
| 152<br>UP                     | <b>Rational</b>                   | Allow to treat induced hematotoxicities.                                                                                                                                                                                                                                                                                                                                                                                                                            |
|                               | <b>Recommendation</b>             | Adapt the dosing regimen of the folic acid based on the indication and the antagonist in question.                                                                                                                                                                                                                                                                                                                                                                  |
|                               | <b>Remark</b>                     | * <u>Non-exhaustive list of folic acid antagonistic treatment</u> : methotrexate, pyrimethamine, trimethoprim, trimetrexate, salazopyrin.                                                                                                                                                                                                                                                                                                                           |
|                               | <b>Reference</b>                  | Résumé des caractéristiques de l'acide folinique (monographie) : <a href="http://agence-prd.ansm.sante.fr/php/ecodex/rcp/R0226090.htm">http://agence-prd.ansm.sante.fr/php/ecodex/rcp/R0226090.htm</a>                                                                                                                                                                                                                                                              |
|                               | <b>Strength of recommendation</b> | Experts median agreement: strongly agree % of experts agree or strongly agree: 97.4 %<br>Median usefulness rating: useful % of experts rating items useful or very useful: 92.3 %                                                                                                                                                                                                                                                                                   |
| <b>DRUG-DRUG INTERACTIONS</b> |                                   |                                                                                                                                                                                                                                                                                                                                                                                                                                                                     |
| 153<br>DDI                    | <b>Rational</b>                   | Potential DDI.                                                                                                                                                                                                                                                                                                                                                                                                                                                      |
|                               | <b>Useful link</b>                | HUG 2014: Drug interactions, cytochromes P450 and P-glycoprotein (Pgp): <a href="http://www.hug-ge.ch/sites/interhug/files/structures/pharmacologie_et_toxicologie_cliniques/documents/interactions_medicamenteuses_et_cyp450.pdf">http://www.hug-ge.ch/sites/interhug/files/structures/pharmacologie_et_toxicologie_cliniques/documents/interactions_medicamenteuses_et_cyp450.pdf</a>                                                                             |
|                               | <b>Strength of recommendation</b> | Experts median agreement: strongly agree % of experts agree or strongly agree: 94.9 %<br>Median usefulness rating: useful % of experts rating items useful or very useful: 92.3 %                                                                                                                                                                                                                                                                                   |
| 154<br>DDI                    | <b>Rational</b>                   | Upon stopping an inducer treatment, enzymatic activity gradually returns to normal (in approximately 2 weeks). Gradual lifting of interaction.                                                                                                                                                                                                                                                                                                                      |
|                               | <b>Recommendation</b>             | Adapt the dosing regimens.                                                                                                                                                                                                                                                                                                                                                                                                                                          |
|                               | <b>Useful link</b>                | **HUG 2014: Drug interactions, cytochromes P450 and P-glycoprotein (Pgp): <a href="http://www.hug-ge.ch/sites/interhug/files/structures/pharmacologie_et_toxicologie_cliniques/documents/interactions_medicamenteuses_et_cyp450.pdf">http://www.hug-ge.ch/sites/interhug/files/structures/pharmacologie_et_toxicologie_cliniques/documents/interactions_medicamenteuses_et_cyp450.pdf</a>                                                                           |
|                               | <b>Strength of recommendation</b> | Experts median agreement: strongly agree % of experts agree or strongly agree: 89.7 %<br>Median usefulness rating: useful % of experts rating items useful or very useful: 92.3 %                                                                                                                                                                                                                                                                                   |
| <b>TRANSPLANTS</b>            |                                   |                                                                                                                                                                                                                                                                                                                                                                                                                                                                     |
| 155<br>UP                     | <b>Rational</b>                   | Risk of destabilisation of the immunosuppression, of rejection or of toxicity.<br>Prevention of side effects related to immunosuppressant overdose or rejection and deterioration of the grft's functions in case of underdosing.                                                                                                                                                                                                                                   |
|                               | <b>Recommendations</b>            | **Monitoring of plasma or blood concentrations proposed:<br>For cyclosporine: C0 and/or C2h after the dose.<br>For tacrolimus and mTOR inhibitors (everolimus, sirolimus): C0.<br>For mycophenolate mofetil: Area under the curve.                                                                                                                                                                                                                                  |
|                               | <b>Remarks</b>                    | * <u>Typical immunosuppressive therapy</u> :<br><u>In cardiac and pulmonary grafts</u> : immunosuppressive tri-therapy, often with higher                                                                                                                                                                                                                                                                                                                           |

immunosuppression levels in the pulmonary graft.  
In renal grafts: bi- or tri-therapy.  
In hepatic grafts: bi- or tri-therapy, sometimes reduced by a specialist to monotherapy in chronic phase.  
 Typical immunosuppressive therapy most often comprises an anti-calcineurin, an anti-metabolite +/- corticosteroids.

**References**  
 ACCP 2011: Pulmonary Complications of Lung Transplantation: <http://journal.publications.chestnet.org/data/Journals/CHEST/22093/101048.pdf>  
 ISHLT 2010: Guidelines for the care of heart transplant recipients: <http://download.journals.elsevierhealth.com/pdfs/journals/1053-2498/PIIS105324981000358X.pdf>  
 AST/ ASTS 2009: Long-term Management of the Liver Transplant Patient: Recommendations for the Primary Care Doctor: <http://onlinelibrary.wiley.com/doi/10.1111/j.1600-6143.2009.02733.x/pdf>  
 KDIGO 2009: Clinical practice guideline for the care of kidney transplant recipients. American Journal of Transplantation: <http://www.kdigo.org/pdf/KDIGO%20Txp%20GL%20publ%20version.pdf>

**Strength of recommendation**  
 Experts median agreement: strongly agree % of experts agree or strongly agree: 100 %  
 Median usefulness rating: very useful % of experts rating items useful or very useful: 94.9 %

**Rational** Prevention of side effects related to immunosuppressive overdose or rejection and deterioration of the grft's functions in case of underdosing.

**Recommendations** \* Monitoring of plasma or blood concentrations proposed:  
 For cyclosporine: C0 and/or C2h after the dose.  
 For tacrolimus and mTOR inhibitors (everolimus, sirolimus): C0.  
 For mycophenolate mofetil: area under the curve.

**Useful link** HUG 2014: Drug interactions, cytochromes P450 and P-glycoprotein (Pgp): [http://www.hug-gc.ch/sites/interhug/files/structures/pharmacologie\\_et\\_toxicologie\\_cliniques/documents/interactions\\_medicamenteuses\\_et\\_cyp450.pdf](http://www.hug-gc.ch/sites/interhug/files/structures/pharmacologie_et_toxicologie_cliniques/documents/interactions_medicamenteuses_et_cyp450.pdf)

**References**  
 ISHLT 2010: Guidelines for the care of heart transplant recipients: <http://download.journals.elsevierhealth.com/pdfs/journals/1053-2498/PIIS105324981000358X.pdf>  
 KDIGO 2009: Clinical practice guideline for the care of kidney transplant recipients. American Journal of Transplantation: <http://www.kdigo.org/pdf/KDIGO%20Txp%20GL%20publ%20version.pdf>

**Strength of recommendation**  
 Experts median agreement: strongly agree % of experts agree or strongly agree: 100 %  
 Median usefulness rating: very useful % of experts rating items useful or very useful: 94.9 %

## VACCINATIONS

**Rational** Increased risk of complications in case of infection, superinfections or decompensations of the underlying disease.

**Recommendation** Offer an annual flu vaccine (preferably between October and December).

**Remarks** \*Non-exhaustive list of patients with a high risk of complications: patients with chronic respiratory disease (asthma, COPD, mucoviscidosis, etc.), a chronic cardiac pathology, CKD, diabetes, hepatic failure, patients receiving treatment with DMARD, biologic treatments, immunosuppressive treatment, age > 65 years, frequent travellers.  
 In immunocompromised patients, use only inactive vaccines.

**References**  
 Vaccine recommendations are constantly changing; they should therefore be consulted regularly.  
 Infovac Suisse : <http://www.infovac.ch/index.php?Itemid=95>  
 Calendrier vaccinal et recommandations vaccinales 2013 France : [http://www.sante.gouv.fr/IMG/pdf/Calendrier\\_vaccinal\\_detaille\\_2013\\_ministere\\_Affaires\\_sociales\\_et\\_Sante-pdf.pdf](http://www.sante.gouv.fr/IMG/pdf/Calendrier_vaccinal_detaille_2013_ministere_Affaires_sociales_et_Sante-pdf.pdf)  
 Vacc.info Belgique : <http://www.vaccination-info.be/>  
 Protocole d'immunisation du Québec : [http://publications.msss.gouv.qc.ca/acrobat/f/documentation/piq/piq\\_complet.pdf](http://publications.msss.gouv.qc.ca/acrobat/f/documentation/piq/piq_complet.pdf)  
 KDIGO 2012: Clinical Practice Guideline for the Evaluation and Management of Chronic Kidney Disease: [http://www.kdigo.org/clinical\\_practice\\_guidelines/pdf/CKD/KDIGO\\_2012\\_CKD\\_GL.pdf](http://www.kdigo.org/clinical_practice_guidelines/pdf/CKD/KDIGO_2012_CKD_GL.pdf)  
 ACCR 2012: Use of Disease-Modifying Antirheumatic Drugs and Biologic Agents in the Treatment of Rheumatoid Arthritis: <http://onlinelibrary.wiley.com/doi/10.1002/acr.21641/pdf>  
 Jacobs J, et al. Biometric fingerprinting for visa application: device and procedure are risk factors for infection transmission. J Travel Med 2008: <http://onlinelibrary.wiley.com/doi/10.1111/j.1708-8305.2008.00232.x/pdf>

**Strength of recommendation**  
 Experts median agreement: strongly agree % of experts agree or strongly agree: 100 %  
 Median usefulness rating: very useful % of experts rating items useful or very useful: 92.3 %

**Rational** Vulnerability to pneumococcal infection, risk of invasive infection.

**Recommendation** Vaccine regimen according to the national vaccine plan, optionally offer new vaccine every 5 years in immunocompromised patients.



oral anticoagulant, DM: diabete mellitus, T1DM: type 1 diabete mellitus, T2DM: type 2 diabete mellitus, DVT: deep vein thrombosis, ER: extended-release, FEV1: forced expiratory volume in one second, G6PD: glucose-6-phosphate dehydrogenase, Hb: haemoglobin, HBA1c: glycated haemoglobin, HBP: high blood pressure, HBV: hepatitis B virus, HCV: hepatitis C virus, HDL-c: high-density lipoprotein cholesterol, HEB: haematoencephalic barrier, HF: heart failure, HIV: human immunodeficiency virus, IM: Intramuscular, INR: International Normalized Ratio, IR: immediate-release, IV: intravenous, LA: long acting, LDL-c: low-density lipoprotein cholesterol, LVEF: left ventricular ejection fraction, MAOI: Monoamine oxidase inhibitor, mTOR: mammalian target of rapamycin, MTX: methotrexate, NSAIDs: nonsteroidal anti-inflammatory drugs, OP: over-prescription, OR: oral route, PE: pulmonry embolism, Pgp: P-glycoprotein, PPIs: proton pump inhibitors, RA: rheumatoid arthritis, sBP: systolic blood pressure, SC: subcutaneous route, SNRI: serotonin-norepinephrine reuptake inhibitor, SR: sustained-release, SSRI: selective serotonin reuptake inhibitors, STEMI: ST-segment elevation myocardial infarction, T3: triiodothyronine, T4: thyroxine, TIA: transient ischaemic attack, TNF: Tumor Necrosis Factor, TSH: Thyroid Stimulating Hormone, UP: under-prescription, VAS: visual analogue scale, Vitamin B1: thiamine, Vitamin B6: pyridoxine, Vitamin PP: nicotinamide, VKA: vitamin K antagonist, VTE: venus thromboembolism, WHO: World Health Organization.
